# Supplementary material for: Chewing differences in consumers affect the digestion and colonic fermentation outcomes: in vitro studies
Source: Royal Society of Chemistry journal article supplement (doi:10.1039/d1fo04364a), 2022-01-01
Supplement: d1fo04364a1.xlsx [file d1fo04364a1.xlsx]

## Sheet: Description
Project	Consumer eating and digestion
Project leader	Esther Kim/ MarcoMorgenstein
Project code	P/212011/01
Project summary
Note:
Protocol for experiment	https://iplant.plantandfood.co.nz/Team/fi/bioengchem/fse/_layouts/15/WopiFrame.aspx?sourcedoc=/Team/fi/bioengchem/fse/SharedDocuments/Consumer%20eating%20and%20digestion/2016%20May_Digestion%20trial%20n=30/CED_Fermn_Exp003.xlsx&action=default
Bioinformatics workflow	https://jupyterhub.powerplant.pfr.co.nz/user/hrrsgp/notebooks/hrrsgp/notebooks/CEDcomb2.ipynb
Note:	1	The DNA from this experiment was extracted and sent for sequencing in two separate runs (
	2	Data from D30 not included in final analysis (email from Esther 29/09/2017)
		D30 has different ethnic group so the chewing behaviour could be different.
		These are NZGL02702 samples S113, S114, S115
		tab colour
Worksheets	include	red	metadata
		white	information of the relative abundance of bacteria at taxonomic levels L2 to L6 (2, 3, 4, 5 and 6 represent phylum, class, order, family and genus respectively)
		grey	shanthi's workings of L6 data
more information on alpha and beta diversity, comparisons etc						\\akldfs12\iplantfiles\Science Teams\Food Structure and Engineering\Exception Files\01 FSE Documents
		This includes Biplots,				what are the top 10 ot top 3 microbial groups most affected by the treatment
			comp_a_div_CED_minuS			significance plots for alpha diversity
			as			alpha beta diversity and the tax information as generated by QIIME1

## Sheet: Metadata
#SampleID	BarcodeSequence	LinkerPrimerSequence	UserID	Chewer	Total_Chewing_time_s	Average_chew_time	MB_group	Day	Substrate_state	Substrate	Control	Time	Description		NZGLcode
#Mapping file for QIIME			Map_File_CED_comb_minuS113114115
S1	AGTATACATA	N	27	D03	20.6	Med	Chewer	1	chewed	rice	NA	16	chewed_rice_16h_D03		02255
S2	AGTATACATA	N	29	D03	20.6	Med	Chewer	1	chewed	rice	NA	16	chewed_rice_16h_D03		02255
S3	AGTATACATA	N	30	D03	20.6	Med	Chewer	1	chewed	rice	NA	16	chewed_rice_16h_D03		02255
S4	AGTATACATA	N	38	D04	34.2	Long	Smoosher	1	chewed	rice	NA	16	chewed_rice_16h_D04		02255
S5	AGTATACATA	N	41	D04	34.2	Long	Smoosher	1	chewed	rice	NA	16	chewed_rice_16h_D04		02255
S6	AGTATACATA	N	42	D04	34.2	Long	Smoosher	1	chewed	rice	NA	16	chewed_rice_16h_D04		02255
S7	AGTATACATA	N	D1U1	NA	NA	NA	Unchewed	1	unchewed	rice	NA	16	unchewed_rice_16h		02255
S8	AGTATACATA	N	D1U2	NA	NA	NA	Unchewed	1	unchewed	rice	NA	16	unchewed_rice_16h		02255
S9	AGTATACATA	N	D1U3	NA	NA	NA	Unchewed	1	unchewed	rice	NA	16	unchewed_rice_16h		02255
S10	AGTATACATA	N	D1H1	NA	NA	NA	Homogenised	1	homogenised	rice	NA	16	homogenised_rice_16h		02255
S11	AGTATACATA	N	D1H2	NA	NA	NA	Homogenised	1	homogenised	rice	NA	16	homogenised_rice_16h		02255
S12	AGTATACATA	N	D1H3	NA	NA	NA	Homogenised	1	homogenised	rice	NA	16	homogenised_rice_16h		02255
S13	AGTATACATA	N	204	D19	18.7	Short	Cruncher	4	chewed	rice	NA	16	chewed_rice_16h_D19		02255
S14	AGTATACATA	N	206	D19	18.7	Short	Cruncher	4	chewed	rice	NA	16	chewed_rice_16h_D19		02255
S15	AGTATACATA	N	207	D19	18.7	Short	Cruncher	4	chewed	rice	NA	16	chewed_rice_16h_D19		02255
S16	AGTATACATA	N	Control A	NA	NA	NA	NA	NA	NA	water	vehicle 16 h	16	water_16h		02255
S17	AGTATACATA	N	Control B	NA	NA	NA	NA	NA	NA	water	vehicle 16 h	16	water_16h		02255
S18	AGTATACATA	N	Blank 0 h	NA	NA	NA	NA	NA	NA	water	inoculum 0 h	0	Blank_0h		02255
S19	AGTATACATA	N	Pos A	NA	NA	NA	NA	NA	NA	inulin GR	inulin GR 16 h	16	inulin_GR_16h		02255
S20	AGTATACATA	N	Pos B	NA	NA	NA	NA	NA	NA	inulin GR	inulin GR 16 h	16	inulin_GR_16h		02255
S21	AGTATACATA	N	Pos C	NA	NA	NA	NA	NA	NA	inulin GR	inulin GR 16 h	16	inulin_GR_16h		02255
S22	AGTATACATA	N	Blank 16 h	NA	NA	NA	NA	NA	NA	water	inoculum 16 h	16	Blank_16h		02255
S23	AGTATACATA	N	5	D01	12.7	Short	Chewer	1	chewed	rice	NA	16	chewed_rice_16h_D01		02255
S24	AGTATACATA	N	7	D01	12.7	Short	Chewer	1	chewed	rice	NA	16	chewed_rice_16h_D01		02255
S25	AGTATACATA	N	8	D01	12.7	Short	Chewer	1	chewed	rice	NA	16	chewed_rice_16h_D01		02255
S26	AGTATACATA	N	50	D05	29.7	Long	Cruncher	1	chewed	rice	NA	16	chewed_rice_16h_D05		02255
S27	AGTATACATA	N	52	D05	29.7	Long	Cruncher	1	chewed	rice	NA	16	chewed_rice_16h_D05		02255
S28	AGTATACATA	N	53	D05	29.7	Long	Cruncher	1	chewed	rice	NA	16	chewed_rice_16h_D05		02255
S29	AGTATACATA	N	303	D28	30.7	Long	Smoosher	5	chewed	rice	NA	16	chewed_rice_16h_D28		02255
S30	AGTATACATA	N	305	D28	30.7	Long	Smoosher	5	chewed	rice	NA	16	chewed_rice_16h_D28		02255
S31	AGTATACATA	N	306	D28	30.7	Long	Smoosher	5	chewed	rice	NA	16	chewed_rice_16h_D28		02255
S32	AGTATACATA	N	17	D02	21	Med	Cruncher	1	chewed	rice	NA	16	chewed_rice_16h_D02		02702
S33	AGTATACATA	N	19	D02	21	Med	Cruncher	1	chewed	rice	NA	16	chewed_rice_16h_D02		02702
S34	AGTATACATA	N	20	D02	21	Med	Cruncher	1	chewed	rice	NA	16	chewed_rice_16h_D02		02702
S35	AGTATACATA	N	61	D06	10.3	Short	Smoosher	1	chewed	rice	NA	16	chewed_rice_16h_D06		02702
S36	AGTATACATA	N	62	D06	10.3	Short	Smoosher	1	chewed	rice	NA	16	chewed_rice_16h_D06		02702
S37	AGTATACATA	N	63	D06	10.3	Short	Smoosher	1	chewed	rice	NA	16	chewed_rice_16h_D06		02702
S38	AGTATACATA	N	71	D07	16	Short	Chewer	2	chewed	rice	NA	16	chewed_rice_16h_D07		02702
S39	AGTATACATA	N	73	D07	16	Short	Chewer	2	chewed	rice	NA	16	chewed_rice_16h_D07		02702
S40	AGTATACATA	N	75	D07	16	Short	Chewer	2	chewed	rice	NA	16	chewed_rice_16h_D07		02702
S41	AGTATACATA	N	83	D08	21	Med	Chewer	2	chewed	rice	NA	16	chewed_rice_16h_D08		02702
S42	AGTATACATA	N	84	D08	21	Med	Chewer	2	chewed	rice	NA	16	chewed_rice_16h_D08		02702
S43	AGTATACATA	N	86	D08	21	Med	Chewer	2	chewed	rice	NA	16	chewed_rice_16h_D08		02702
S44	AGTATACATA	N	93	D09	22.8	Med	Smoosher	2	chewed	rice	NA	16	chewed_rice_16h_D09		02702
S45	AGTATACATA	N	96	D09	22.8	Med	Smoosher	2	chewed	rice	NA	16	chewed_rice_16h_D09		02702
S46	AGTATACATA	N	97	D09	22.8	Med	Smoosher	2	chewed	rice	NA	16	chewed_rice_16h_D09		02702
S47	AGTATACATA	N	105	D10	20.9	Med	Cruncher	2	chewed	rice	NA	16	chewed_rice_16h_D10		02702
S48	AGTATACATA	N	106	D10	20.9	Med	Cruncher	2	chewed	rice	NA	16	chewed_rice_16h_D10		02702
S49	AGTATACATA	N	107	D10	20.9	Med	Cruncher	2	chewed	rice	NA	16	chewed_rice_16h_D10		02702
S50	AGTATACATA	N	115	D11	32.7	Long	Smoosher	2	chewed	rice	NA	16	chewed_rice_16h_D11		02702
S51	AGTATACATA	N	117	D11	32.7	Long	Smoosher	2	chewed	rice	NA	16	chewed_rice_16h_D11		02702
S52	AGTATACATA	N	119	D11	32.7	Long	Smoosher	2	chewed	rice	NA	16	chewed_rice_16h_D11		02702
S53	AGTATACATA	N	127	D12	28.4	Long	Cruncher	2	chewed	rice	NA	16	chewed_rice_16h_D12		02702
S54	AGTATACATA	N	128	D12	28.4	Long	Cruncher	2	chewed	rice	NA	16	chewed_rice_16h_D12		02702
S55	AGTATACATA	N	130	D12	28.4	Long	Cruncher	2	chewed	rice	NA	16	chewed_rice_16h_D12		02702
S56	AGTATACATA	N	D2U1	Unchewed	Unchewed	Unchewed	Unchewed	2	Unchewed	rice	NA	16	unchewed_rice_16h_		02702
S57	AGTATACATA	N	D2U2	Unchewed	Unchewed	Unchewed	Unchewed	2	Unchewed	rice	NA	16	unchewed_rice_16h_		02702
S58	AGTATACATA	N	D2U3	Unchewed	Unchewed	Unchewed	Unchewed	2	Unchewed	rice	NA	16	unchewed_rice_16h_		02702
S59	AGTATACATA	N	D2H1	Homogenised	Homogenised	Homogenised	Homogenised	2	Homogenised	rice	NA	16	homogenised_rice_16h_		02702
S60	AGTATACATA	N	D2H2	Homogenised	Homogenised	Homogenised	Homogenised	2	Homogenised	rice	NA	16	homogenised_rice_16h_		02702
S61	AGTATACATA	N	D2H3	Homogenised	Homogenised	Homogenised	Homogenised	2	Homogenised	rice	NA	16	homogenised_rice_16h_		02702
S62	AGTATACATA	N	138	D13	23.7	Med	Smoosher	3	chewed	rice	NA	16	chewed_rice_16h_D13		02702
S63	AGTATACATA	N	139	D13	23.7	Med	Smoosher	3	chewed	rice	NA	16	chewed_rice_16h_D13		02702
S64	AGTATACATA	N	140	D13	23.7	Med	Smoosher	3	chewed	rice	NA	16	chewed_rice_16h_D13		02702
S65	AGTATACATA	N	148	D14	20.4	Med	Smoosher	3	chewed	rice	NA	16	chewed_rice_16h_D14		02702
S66	AGTATACATA	N	151	D14	20.4	Med	Smoosher	3	chewed	rice	NA	16	chewed_rice_16h_D14		02702
S67	AGTATACATA	N	152	D14	20.4	Med	Smoosher	3	chewed	rice	NA	16	chewed_rice_16h_D14		02702
S68	AGTATACATA	N	160	D15	28.2	Long	Chewer	3	chewed	rice	NA	16	chewed_rice_16h_D15		02702
S69	AGTATACATA	N	162	D15	28.2	Long	Chewer	3	chewed	rice	NA	16	chewed_rice_16h_D15		02702
S70	AGTATACATA	N	163	D15	28.2	Long	Chewer	3	chewed	rice	NA	16	chewed_rice_16h_D15		02702
S71	AGTATACATA	N	170	D16	10.2	Short	Chewer	3	chewed	rice	NA	16	chewed_rice_16h_D16		02702
S72	AGTATACATA	N	172	D16	10.2	Short	Chewer	3	chewed	rice	NA	16	chewed_rice_16h_D16		02702
S73	AGTATACATA	N	173	D16	10.2	Short	Chewer	3	chewed	rice	NA	16	chewed_rice_16h_D16		02702
S74	AGTATACATA	N	182	D17	11.1	Short	Cruncher	3	chewed	rice	NA	16	chewed_rice_16h_D17		02702
S75	AGTATACATA	N	183	D17	11.1	Short	Cruncher	3	chewed	rice	NA	16	chewed_rice_16h_D17		02702
S76	AGTATACATA	N	185	D17	11.1	Short	Cruncher	3	chewed	rice	NA	16	chewed_rice_16h_D17		02702
S77	AGTATACATA	N	192	D18	36.1	Long	Smoosher	3	chewed	rice	NA	16	chewed_rice_16h_D18		02702
S78	AGTATACATA	N	194	D18	36.1	Long	Smoosher	3	chewed	rice	NA	16	chewed_rice_16h_D18		02702
S79	AGTATACATA	N	195	D18	36.1	Long	Smoosher	3	chewed	rice	NA	16	chewed_rice_16h_D18		02702
S80	AGTATACATA	N	D3U1	Unchewed	Unchewed	Unchewed	Unchewed	3	Unchewed	rice	NA	16	unchewed_rice_16h_		02702
S81	AGTATACATA	N	D3U2	Unchewed	Unchewed	Unchewed	Unchewed	3	Unchewed	rice	NA	16	unchewed_rice_16h_		02702
S82	AGTATACATA	N	D3U3	Unchewed	Unchewed	Unchewed	Unchewed	3	Unchewed	rice	NA	16	unchewed_rice_16h_		02702
S83	AGTATACATA	N	D3H1	Homogenised	Homogenised	Homogenised	Homogenised	3	Homogenised	rice	NA	16	homogenised_rice_16h_		02702
S84	AGTATACATA	N	D3H2	Homogenised	Homogenised	Homogenised	Homogenised	3	Homogenised	rice	NA	16	homogenised_rice_16h_		02702
S85	AGTATACATA	N	D3H3	Homogenised	Homogenised	Homogenised	Homogenised	3	Homogenised	rice	NA	16	homogenised_rice_16h_		02702
S86	AGTATACATA	N	215	D20	40.8	Long	Smoosher	4	chewed	rice	NA	16	chewed_rice_16h_D20		02702
S87	AGTATACATA	N	216	D20	40.8	Long	Smoosher	4	chewed	rice	NA	16	chewed_rice_16h_D20		02702
S88	AGTATACATA	N	218	D20	40.8	Long	Smoosher	4	chewed	rice	NA	16	chewed_rice_16h_D20		02702
S89	AGTATACATA	N	225	D21	16.7	Short	Cruncher	4	chewed	rice	NA	16	chewed_rice_16h_D21		02702
S90	AGTATACATA	N	228	D21	16.7	Short	Cruncher	4	chewed	rice	NA	16	chewed_rice_16h_D21		02702
S91	AGTATACATA	N	229	D21	16.7	Short	Cruncher	4	chewed	rice	NA	16	chewed_rice_16h_D21		02702
S92	AGTATACATA	N	236	D22	19.2	Short	Chewer	4	chewed	rice	NA	16	chewed_rice_16h_D22		02702
S93	AGTATACATA	N	238	D22	19.2	Short	Chewer	4	chewed	rice	NA	16	chewed_rice_16h_D22		02702
S94	AGTATACATA	N	239	D22	19.2	Short	Chewer	4	chewed	rice	NA	16	chewed_rice_16h_D22		02702
S95	AGTATACATA	N	248	D23	14.7	Short	Chewer	4	chewed	rice	NA	16	chewed_rice_16h_D23		02702
S96	AGTATACATA	N	249	D23	14.7	Short	Chewer	4	chewed	rice	NA	16	chewed_rice_16h_D23		02702
S97	AGTATACATA	N	251	D23	14.7	Short	Chewer	4	chewed	rice	NA	16	chewed_rice_16h_D23		02702
S98	AGTATACATA	N	258	D24	26.1	Med	Smoosher	4	chewed	rice	NA	16	chewed_rice_16h_D24		02702
S99	AGTATACATA	N	260	D24	26.1	Med	Smoosher	4	chewed	rice	NA	16	chewed_rice_16h_D24		02702
S100	AGTATACATA	N	262	D24	26.1	Med	Smoosher	4	chewed	rice	NA	16	chewed_rice_16h_D24		02702
S101	AGTATACATA	N	270	D25	14.9	Short	Cruncher	5	chewed	rice	NA	16	chewed_rice_16h_D25		02702
S102	AGTATACATA	N	271	D25	14.9	Short	Cruncher	5	chewed	rice	NA	16	chewed_rice_16h_D25		02702
S103	AGTATACATA	N	272	D25	14.9	Short	Cruncher	5	chewed	rice	NA	16	chewed_rice_16h_D25		02702
S104	AGTATACATA	N	280	D26	25.6	Med	Chewer	5	chewed	rice	NA	16	chewed_rice_16h_D26		02702
S105	AGTATACATA	N	283	D26	25.6	Med	Chewer	5	chewed	rice	NA	16	chewed_rice_16h_D26		02702
S106	AGTATACATA	N	284	D26	25.6	Med	Chewer	5	chewed	rice	NA	16	chewed_rice_16h_D26		02702
S107	AGTATACATA	N	292	D27	41.3	Long	Chewer	5	chewed	rice	NA	16	chewed_rice_16h_D27		02702
S108	AGTATACATA	N	293	D27	41.3	Long	Chewer	5	chewed	rice	NA	16	chewed_rice_16h_D27		02702
S109	AGTATACATA	N	294	D27	41.3	Long	Chewer	5	chewed	rice	NA	16	chewed_rice_16h_D27		02702
S110	AGTATACATA	N	313	D29	29	Long	Cruncher	5	chewed	rice	NA	16	chewed_rice_16h_D29		02702
S111	AGTATACATA	N	315	D29	29	Long	Cruncher	5	chewed	rice	NA	16	chewed_rice_16h_D29		02702
S112	AGTATACATA	N	317	D29	29	Long	Cruncher	5	chewed	rice	NA	16	chewed_rice_16h_D29		02702
S116	AGTATACATA	N	Pos A rpt	NA			NA	NA	NA	NA	inulin GR	16	inulin_GR		02702
S117	AGTATACATA	N	Pos B rpt	NA			NA	NA	NA	NA	inulin GR	16	inulin_GR		02702
S118	AGTATACATA	N	Blank 0 h	NA			NA	NA	NA	NA	water	0	Blank_0h		02702

## Sheet: L2_2
#SampleID	UserID	Chewer	Total_Chewing_time_s	Average_chew_time	MB_group	Day	Substrate_state	Substrate	Control	Time	Description	Unassigned;Other	k__Archaea;p__Euryarchaeota	k__Bacteria;Other	k__Bacteria;p__Actinobacteria	k__Bacteria;p__Bacteroidetes	k__Bacteria;p__Cyanobacteria	k__Bacteria;p__Firmicutes	k__Bacteria;p__Fusobacteria	k__Bacteria;p__Lentisphaerae	k__Bacteria;p__OD1	k__Bacteria;p__Planctomycetes	k__Bacteria;p__Proteobacteria	k__Bacteria;p__SAR406	k__Bacteria;p__Synergistetes	k__Bacteria;p__TM7	k__Bacteria;p__Tenericutes	k__Bacteria;p__Verrucomicrobia	k__Bacteria;p__[Thermi]
S1	27	D03	20.6	Med	Chewer	1	chewed	rice	NA	16	chewed_rice_16h_D03	0.0146158	4.98954e-05	0	0.321301	0.223407	3.56396e-06	0.380759	0	0	0	0	0.058677	0	0	3.56396e-06	4.27675e-05	0.00114047	0
S2	29	D03	20.6	Med	Chewer	1	chewed	rice	NA	16	chewed_rice_16h_D03	0.0147135	7.28393e-05	1.12061e-05	0.303846	0.231511	5.60303e-06	0.376955	0	0	0	0	0.0713097	0	5.60303e-06	3.36182e-05	5.60303e-05	0.0014792	0
S3	30	D03	20.6	Med	Chewer	1	chewed	rice	NA	16	chewed_rice_16h_D03	0.0133974	7.41133e-05	0	0.298945	0.22189	1.71031e-05	0.396142	0	0	0	0	0.068247	0	0	3.42062e-05	5.13092e-05	0.00120292	0
S4	38	D04	34.2	Long	Smoosher	1	chewed	rice	NA	16	chewed_rice_16h_D04	0.0171853	5.32547e-06	0	0.131464	0.306486	0	0.405774	0	0	0	0	0.138015	0	0	1.59764e-05	1.59764e-05	0.00103314	5.32547e-06
S5	41	D04	34.2	Long	Smoosher	1	chewed	rice	NA	16	chewed_rice_16h_D04	0.0147487	0	0	0.149506	0.268448	0	0.511029	0	0	0	0	0.0555457	0	0	0	4.78389e-05	0.000674528	0
S6	42	D04	34.2	Long	Smoosher	1	chewed	rice	NA	16	chewed_rice_16h_D04	0.0150563	1.17596e-05	0	0.118859	0.328854	0	0.395692	0	0	0	0	0.140677	0	0	1.95994e-05	3.52789e-05	0.000795735	0
S7	D1U1	NA	NA	NA	Unchewed	1	unchewed	rice	NA	16	unchewed_rice_16h	0.0139768	1.4137e-05	0	0.283254	0.258985	0	0.346126	0	0	0	0	0.0970411	0	0	0	3.76987e-05	0.00056548	0
S8	D1U2	NA	NA	NA	Unchewed	1	unchewed	rice	NA	16	unchewed_rice_16h	0.0138537	2.58879e-05	0	0.30176	0.232159	0.000218198	0.396706	3.69827e-06	0	0	0	0.0542942	0	0	2.21896e-05	3.69827e-05	0.000920868	0
S9	D1U3	NA	NA	NA	Unchewed	1	unchewed	rice	NA	16	unchewed_rice_16h	0.0145972	2.81528e-05	0	0.258832	0.269816	4.22291e-05	0.341943	0	0	0	0	0.114197	0	0	0	4.69213e-06	0.000539595	0
S10	D1H1	NA	NA	NA	Homogenised	1	homogenised	rice	NA	16	homogenised_rice_16h	0.0132695	0	0	0.141398	0.29757	3.46334e-05	0.431611	0	0	0	0	0.115196	0	0	9.89526e-06	2.96858e-05	0.000880678	0
S11	D1H2	NA	NA	NA	Homogenised	1	homogenised	rice	NA	16	homogenised_rice_16h	0.0160655	9.83403e-06	0	0.0815569	0.419081	3.60581e-05	0.326798	3.27801e-06	0	0	0	0.155702	0	0	3.27801e-06	4.58922e-05	0.000698216	0
S12	D1H3	NA	NA	NA	Homogenised	1	homogenised	rice	NA	16	homogenised_rice_16h	0.0210804	3.63581e-06	7.27162e-06	0.214036	0.26821	0.000105438	0.325674	0	0	0	0	0.168865	0	0	1.8179e-05	5.09013e-05	0.00194879	0
S13	204	D19	18.7	Short	Cruncher	4	chewed	rice	NA	16	chewed_rice_16h_D19	0.0131215	5.22977e-06	0	0.191802	0.232882	4.18382e-05	0.41357	0	0	0	0	0.148243	0	0	0	1.04595e-05	0.000324246	0
S14	206	D19	18.7	Short	Cruncher	4	chewed	rice	NA	16	chewed_rice_16h_D19	0.0105797	0	0	0.295649	0.231049	1.78109e-05	0.261862	0	5.93697e-06	0	0	0.200313	0	0	1.18739e-05	1.18739e-05	0.000498706	0
S15	207	D19	18.7	Short	Cruncher	4	chewed	rice	NA	16	chewed_rice_16h_D19	0.00875586	6.96568e-06	0	0.306218	0.216396	0	0.263191	0	0	0	0	0.205028	0	0	1.39314e-05	1.39314e-05	0.000376147	0
S16	Control A	NA	NA	NA	NA	NA	NA	water	vehicle 16 h	16	water_16h	0.00869915	2.8244e-05	0	0.0614378	0.184899	7.061e-06	0.501472	0	0	0	0	0.24311	0	0	2.8244e-05	2.8244e-05	0.000289501	0
S17	Control B	NA	NA	NA	NA	NA	NA	water	vehicle 16 h	16	water_16h	0.00768038	1.62605e-05	0	0.0505214	0.167944	5.96219e-05	0.465056	0	0	0	0	0.308608	0	0	1.08403e-05	4.33614e-05	5.96219e-05	0
S18	Blank 0 h	NA	NA	NA	NA	NA	NA	water	inoculum 0 h	0	Blank_0h	0.00509919	7.2638e-05	0	0.113192	0.19982	1.45276e-05	0.671909	7.2638e-06	0	0	0	0.0080265	0	0	5.08466e-05	7.99018e-05	0.00172878	0
S19	Pos A	NA	NA	NA	NA	NA	NA	inulin GR	inulin GR 16 h	16	inulin_GR_16h	0.00879985	0	0	0.294153	0.190604	0	0.203479	0	0	0	0	0.302913	0	0	1.15106e-05	0	4.02871e-05	0
S20	Pos B	NA	NA	NA	NA	NA	NA	inulin GR	inulin GR 16 h	16	inulin_GR_16h	0.00919711	5.42602e-06	0	0.271448	0.202684	0	0.252495	0	1.62781e-05	0	0	0.263808	0	0	1.62781e-05	1.0852e-05	0.000320135	0
S21	Pos C	NA	NA	NA	NA	NA	NA	inulin GR	inulin GR 16 h	16	inulin_GR_16h	0.0116857	0	5.86631e-06	0.219529	0.251553	5.86631e-06	0.256657	0	0	0	0	0.260153	0	0	1.17326e-05	1.75989e-05	0.000357845	2.34652e-05
S22	Blank 16 h	NA	NA	NA	NA	NA	NA	water	inoculum 16 h	16	Blank_16h	0.00746096	1.7378e-05	0	0.050541	0.220342	5.79267e-06	0.457157	0	0	0	0	0.264175	0	0	1.7378e-05	4.63414e-05	0.000237499	0
S23	5	D01	12.7	Short	Chewer	1	chewed	rice	NA	16	chewed_rice_16h_D01	0.00910225	1.80869e-05	0	0.326745	0.198314	2.71304e-05	0.389936	4.52174e-06	4.52174e-06	0	0	0.0752733	0	0	1.35652e-05	2.71304e-05	0.00052	1.35652e-05
S24	7	D01	12.7	Short	Chewer	1	chewed	rice	NA	16	chewed_rice_16h_D01	0.0123379	1.73712e-05	0	0.304383	0.214283	1.30284e-05	0.38555	0	0	0	0	0.0825002	0	0	3.03996e-05	3.47424e-05	0.000846847	4.3428e-06
S25	8	D01	12.7	Short	Chewer	1	chewed	rice	NA	16	chewed_rice_16h_D01	0.00934504	2.16822e-05	0	0.369025	0.186947	2.47797e-05	0.362186	0	0	3.09746e-06	0	0.0720934	0	0	1.54873e-05	3.09746e-06	0.000334526	0
S26	50	D05	29.7	Long	Cruncher	1	chewed	rice	NA	16	chewed_rice_16h_D05	0.00886945	0	0	0.182953	0.260424	4.59795e-06	0.407071	0	0	0	0	0.140472	0	0	4.59795e-06	0	0.00020231	0
S27	52	D05	29.7	Long	Cruncher	1	chewed	rice	NA	16	chewed_rice_16h_D05	0.00702848	1.59015e-05	0	0.164735	0.27154	1.59015e-05	0.39968	0	0	0	0	0.156683	0	0	2.12021e-05	4.24041e-05	0.000238523	0
S28	53	D05	29.7	Long	Cruncher	1	chewed	rice	NA	16	chewed_rice_16h_D05	0.00923327	5.85868e-06	0	0.152947	0.263482	1.17174e-05	0.419593	0	0	0	0	0.154405	0	0	1.7576e-05	1.7576e-05	0.000287075	0
S29	303	D28	30.7	Long	Smoosher	5	chewed	rice	NA	16	chewed_rice_16h_D28	0.00701924	0	0	0.190625	0.18803	0	0.376559	0	0	0	0	0.237625	0	0	1.42282e-05	0	0.000123311	4.74273e-06
S30	305	D28	30.7	Long	Smoosher	5	chewed	rice	NA	16	chewed_rice_16h_D28	0.0080353	0	0	0.252433	0.127254	1.03215e-05	0.379548	0	0	0	0	0.232513	0	0	5.16076e-06	5.16076e-06	0.000196109	0
S31	306	D28	30.7	Long	Smoosher	5	chewed	rice	NA	16	chewed_rice_16h_D28	0.00746547	0	0	0.323304	0.177194	0	0.241849	0	0	0	0	0.249897	0	0	3.57689e-05	5.10984e-06	0.000250382	0
S32	17	D02	21	Med	Cruncher	1	chewed	rice	NA	16	chewed_rice_16h_D02	0.0312069	5.25811e-05	0	0.324741	0.220722	1.31453e-05	0.353174	0	0	0	0	0.0680136	0	0	1.31453e-05	0.000131453	0.00193235	0
S33	19	D02	21	Med	Cruncher	1	chewed	rice	NA	16	chewed_rice_16h_D02	0.033074	7.22139e-05	0	0.275279	0.260385	0	0.298659	0	0	0	0	0.130779	0	0	1.80535e-05	7.22139e-05	0.00166092	0
S34	20	D02	21	Med	Cruncher	1	chewed	rice	NA	16	chewed_rice_16h_D02	0.0329602	9.64878e-05	0	0.322983	0.191451	0	0.390892	0	0	0	0	0.0598804	0	0	0	5.78927e-05	0.00167889	0
S35	61	D06	10.3	Short	Smoosher	1	chewed	rice	NA	16	chewed_rice_16h_D06	0.0389605	0	0	0.150601	0.246816	0	0.421486	0	0	0	0	0.140851	0	0	1.97769e-05	1.97769e-05	0.00124595	0
S36	62	D06	10.3	Short	Smoosher	1	chewed	rice	NA	16	chewed_rice_16h_D06	0.0265209	0	0	0.271651	0.223995	0	0.330346	0	0	0	0	0.145928	0	0	1.57488e-05	0.000110241	0.00143314	0
S37	63	D06	10.3	Short	Smoosher	1	chewed	rice	NA	16	chewed_rice_16h_D06	0.0384988	0	0	0.168571	0.230448	0	0.448278	2.01882e-05	0	0	0	0.113316	0	0	0	0	0.000868091	0
S38	71	D07	16	Short	Chewer	2	chewed	rice	NA	16	chewed_rice_16h_D07	0.0307592	1.54725e-05	0	0.242562	0.262521	0	0.313255	0	0	0	0	0.14999	0	0	0	7.73623e-05	0.00082004	0
S39	73	D07	16	Short	Chewer	2	chewed	rice	NA	16	chewed_rice_16h_D07	0.0315646	0	0	0.279097	0.256828	0	0.30805	0	0	0	0	0.123605	0	0	0	5.61648e-05	0.000800348	0
S40	75	D07	16	Short	Chewer	2	chewed	rice	NA	16	chewed_rice_16h_D07	0.0284955	5.81243e-05	0	0.263841	0.258305	0	0.304194	0	0	0	0	0.143829	0	0	1.45311e-05	2.90622e-05	0.00123514	0
S41	83	D08	21	Med	Chewer	2	chewed	rice	NA	16	chewed_rice_16h_D08	0.0282289	1.6094e-05	0	0.240653	0.18022	0	0.393385	0	0	0	0	0.15624	0	0	0	1.6094e-05	0.00123924	0
S42	84	D08	21	Med	Chewer	2	chewed	rice	NA	16	chewed_rice_16h_D08	0.0269592	1.24869e-05	0	0.138542	0.286612	0	0.40204	0	0	0	0	0.145347	0	0	0	4.99476e-05	0.000437041	0
S43	86	D08	21	Med	Chewer	2	chewed	rice	NA	16	chewed_rice_16h_D08	0.0351838	0	0	0.115006	0.277008	0	0.404189	0	1.1019e-05	0	0	0.167776	0	0	0	7.71333e-05	0.000749295	0
S44	93	D09	22.8	Med	Smoosher	2	chewed	rice	NA	16	chewed_rice_16h_D09	0.0356252	3.58042e-05	0	0.114048	0.268985	0	0.397129	0	0	0	0	0.18327	0	0	0	2.38695e-05	0.000883171	0
S45	96	D09	22.8	Med	Smoosher	2	chewed	rice	NA	16	chewed_rice_16h_D09	0.033581	0	0	0.100817	0.295006	0	0.384372	2.96652e-05	0	0	0	0.18517	0	0	1.48326e-05	4.44978e-05	0.00096412	0
S46	97	D09	22.8	Med	Smoosher	2	chewed	rice	NA	16	chewed_rice_16h_D09	0.0312403	0	0	0.115123	0.297236	0	0.396838	4.42184e-05	0	0	0	0.158678	0	0	2.21092e-05	8.84369e-05	0.000729604	0
S47	105	D10	20.9	Med	Cruncher	2	chewed	rice	NA	16	chewed_rice_16h_D10	0.0354738	0	0	0.218356	0.250823	0	0.333798	2.17898e-05	0	0	0	0.158303	0	0	0	4.35796e-05	0.00318131	0
S48	106	D10	20.9	Med	Cruncher	2	chewed	rice	NA	16	chewed_rice_16h_D10	0.0290597	4.43885e-05	0	0.242953	0.215935	0	0.317053	0	0	0	0	0.193652	0	0	0	8.87771e-05	0.00121329	0
S49	107	D10	20.9	Med	Cruncher	2	chewed	rice	NA	16	chewed_rice_16h_D10	0.0361547	1.85981e-05	0	0.240548	0.221336	1.85981e-05	0.371683	0	0	0	0	0.128922	0	0	0	1.85981e-05	0.00130187	0
S50	115	D11	32.7	Long	Smoosher	2	chewed	rice	NA	16	chewed_rice_16h_D11	0.0326422	0	2.18929e-05	0.176478	0.220746	0	0.429779	0	0	0	0	0.139655	0	0	0	6.56786e-05	0.000613	0
S51	117	D11	32.7	Long	Smoosher	2	chewed	rice	NA	16	chewed_rice_16h_D11	0.0274793	1.42527e-05	0	0.135529	0.261851	0	0.428523	0	0	0	0	0.14572	0	0	0	2.85055e-05	0.000855164	0
S52	119	D11	32.7	Long	Smoosher	2	chewed	rice	NA	16	chewed_rice_16h_D11	0.0258852	0	0	0.10113	0.297947	0	0.450985	0	0	0	0	0.123295	0	0	1.72224e-05	1.72224e-05	0.00072334	0
S53	127	D12	28.4	Long	Cruncher	2	chewed	rice	NA	16	chewed_rice_16h_D12	0.0286537	0	0	0.177374	0.235444	0	0.419186	0	0	0	0	0.138235	0	0	1.90643e-05	3.81286e-05	0.00104854	0
S54	128	D12	28.4	Long	Cruncher	2	chewed	rice	NA	16	chewed_rice_16h_D12	0.0254843	2.43055e-05	0	0.277593	0.216307	0	0.312933	3.64582e-05	0	0	0	0.166225	0	0	1.21527e-05	0.000121527	0.00126388	0
S55	130	D12	28.4	Long	Cruncher	2	chewed	rice	NA	16	chewed_rice_16h_D12	0.0384486	0	0	0.21908	0.177294	0	0.419232	0	0	0	0	0.144148	0	0	3.04785e-05	7.61963e-05	0.00169156	0
S56	D2U1	Unchewed	Unchewed	Unchewed	Unchewed	2	Unchewed	rice	NA	16	unchewed_rice_16h_	0.0397333	2.22284e-05	0	0.260061	0.232976	1.11142e-05	0.336338	1.11142e-05	0	0	0	0.129881	0	0	0	2.22284e-05	0.000944707	0
S57	D2U2	Unchewed	Unchewed	Unchewed	Unchewed	2	Unchewed	rice	NA	16	unchewed_rice_16h_	0.0360838	8.21207e-05	0	0.281345	0.221365	0	0.383142	0	0	0	0	0.0768157	0	0	0	0.000131393	0.00103472	0
S58	D2U3	Unchewed	Unchewed	Unchewed	Unchewed	2	Unchewed	rice	NA	16	unchewed_rice_16h_	0.0235159	4.64742e-05	0	0.322531	0.187182	1.54914e-05	0.412737	0	0	0	0	0.05312	0	0	1.54914e-05	4.64742e-05	0.000790061	0
S59	D2H1	Homogenised	Homogenised	Homogenised	Homogenised	2	Homogenised	rice	NA	16	homogenised_rice_16h_	0.0339061	2.8734e-05	0	0.083113	0.370108	0	0.340613	0	0	0	0	0.170824	0	0	0	5.7468e-05	0.0013505	0
S60	D2H2	Homogenised	Homogenised	Homogenised	Homogenised	2	Homogenised	rice	NA	16	homogenised_rice_16h_	0.0254415	0	0	0.121767	0.280693	0	0.463722	0	0	0	0	0.10731	0	0	1.28622e-05	0.00011576	0.000938943	0
S61	D2H3	Homogenised	Homogenised	Homogenised	Homogenised	2	Homogenised	rice	NA	16	homogenised_rice_16h_	0.0266331	1.37001e-05	0	0.0802006	0.358834	0	0.382384	4.11004e-05	0	0	0	0.151017	0	0	1.37001e-05	2.74003e-05	0.000835708	0
S62	138	D13	23.7	Med	Smoosher	3	chewed	rice	NA	16	chewed_rice_16h_D13	0.0312282	0	0	0.288108	0.17357	0	0.338872	0	0	0	0	0.167407	0	0	2.58405e-05	5.16809e-05	0.000736453	0
S63	139	D13	23.7	Med	Smoosher	3	chewed	rice	NA	16	chewed_rice_16h_D13	0.030062	0	0	0.221228	0.201617	0	0.417507	0	0	0	0	0.128722	0	0	0	2.36709e-05	0.000840316	0
S64	140	D13	23.7	Med	Smoosher	3	chewed	rice	NA	16	chewed_rice_16h_D13	0.0279981	0	1.2855e-05	0.185291	0.228317	1.2855e-05	0.43041	0	0	0	0	0.127405	0	0	0	1.2855e-05	0.000539908	0
S65	148	D14	20.4	Med	Smoosher	3	chewed	rice	NA	16	chewed_rice_16h_D14	0.02273	0	0	0.146645	0.318944	1.5073e-05	0.345939	0	0	0	0	0.165139	0	0	0	9.04377e-05	0.000497407	0
S66	151	D14	20.4	Med	Smoosher	3	chewed	rice	NA	16	chewed_rice_16h_D14	0.0234868	1.09854e-05	0	0.149258	0.287422	0	0.362496	0	0	0	0	0.176821	0	0	1.09854e-05	8.78831e-05	0.000406459	0
S67	152	D14	20.4	Med	Smoosher	3	chewed	rice	NA	16	chewed_rice_16h_D14	0.0309241	1.46699e-05	0	0.126513	0.287441	4.40096e-05	0.357886	0	0	0	0	0.1964	0	0	1.46699e-05	4.40096e-05	0.000718823	0
S68	160	D15	28.2	Long	Chewer	3	chewed	rice	NA	16	chewed_rice_16h_D15	0.0382613	0	0	0.11989	0.295342	0	0.36078	0	0	0	0	0.185129	2.49097e-05	0	1.24549e-05	4.98194e-05	0.000510649	0
S69	162	D15	28.2	Long	Chewer	3	chewed	rice	NA	16	chewed_rice_16h_D15	0.0256538	1.42126e-05	0	0.158854	0.261242	0	0.402885	1.42126e-05	0	0	0	0.150725	0	0	0	5.68505e-05	0.000554292	0
S70	163	D15	28.2	Long	Chewer	3	chewed	rice	NA	16	chewed_rice_16h_D15	0.0251865	0	0	0.165747	0.249198	0	0.419739	0	0	0	0	0.139728	0	0	0	6.16561e-05	0.000339108	0
S71	170	D16	10.2	Short	Chewer	3	chewed	rice	NA	16	chewed_rice_16h_D16	0.0267456	1.61215e-05	0	0.284061	0.266682	1.61215e-05	0.306099	0	0	0	0	0.115059	0	0	0	8.06075e-05	0.00124135	0
S72	172	D16	10.2	Short	Chewer	3	chewed	rice	NA	16	chewed_rice_16h_D16	0.026062	0	0	0.292095	0.218654	0	0.341187	0	0	0	0	0.121077	0	0	0	3.03223e-05	0.000894509	0
S73	173	D16	10.2	Short	Chewer	3	chewed	rice	NA	16	chewed_rice_16h_D16	0.0155541	0	0	0.298823	0.243967	0	0.339795	0	0	0	0	0.101433	0	0	0	6.41849e-05	0.000363714	0
S74	182	D17	11.1	Short	Cruncher	3	chewed	rice	NA	16	chewed_rice_16h_D17	0.0272795	1.35181e-05	0	0.296857	0.268983	0	0.276337	0	0	0	0	0.130071	0	0	0	1.35181e-05	0.000446097	0
S75	183	D17	11.1	Short	Cruncher	3	chewed	rice	NA	16	chewed_rice_16h_D17	0.020201	0	0	0.298824	0.271298	0	0.272918	0	0	0	0	0.13562	0	0	1.17379e-05	4.69517e-05	0.00107989	0
S76	185	D17	11.1	Short	Cruncher	3	chewed	rice	NA	16	chewed_rice_16h_D17	0.0323622	2.81901e-05	0	0.252301	0.265099	0	0.299548	1.4095e-05	0	0	0	0.149492	0	0	1.4095e-05	2.81901e-05	0.00111351	0
S77	192	D18	36.1	Long	Smoosher	3	chewed	rice	NA	16	chewed_rice_16h_D18	0.0244738	0	0	0.115077	0.296506	0	0.377108	0	0	0	0	0.1862	0	0	0	6.34035e-05	0.000570631	0
S78	194	D18	36.1	Long	Smoosher	3	chewed	rice	NA	16	chewed_rice_16h_D18	0.0254879	0	0	0.134609	0.286795	0	0.358339	0	0	0	0	0.194237	0	0	3.70824e-05	7.41647e-05	0.000420267	0
S79	195	D18	36.1	Long	Smoosher	3	chewed	rice	NA	16	chewed_rice_16h_D18	0.0354941	1.53721e-05	0	0.144252	0.272716	3.07442e-05	0.359415	0	0	0	0	0.187186	0	0	0	3.07442e-05	0.000860837	0
S80	D3U1	Unchewed	Unchewed	Unchewed	Unchewed	3	Unchewed	rice	NA	16	unchewed_rice_16h_	0.0263734	0	0	0.297622	0.171796	0	0.442419	9.32253e-06	0	0	0	0.0611465	0	0	0	9.32253e-06	0.00062461	0
S81	D3U2	Unchewed	Unchewed	Unchewed	Unchewed	3	Unchewed	rice	NA	16	unchewed_rice_16h_	0.0261166	4.65261e-05	0	0.313151	0.219293	0	0.346821	0	1.55087e-05	0	0	0.0939361	0	0	0	3.10174e-05	0.000573821	1.55087e-05
S82	D3U3	Unchewed	Unchewed	Unchewed	Unchewed	3	Unchewed	rice	NA	16	unchewed_rice_16h_	0.02061	1.27458e-05	0	0.338045	0.191519	0	0.385447	0	0	0	0	0.0636782	0	0	0	2.54917e-05	0.000662783	0
S83	D3H1	Homogenised	Homogenised	Homogenised	Homogenised	3	Homogenised	rice	NA	16	homogenised_rice_16h_	0.0364013	0	0	0.201758	0.163235	3.21425e-05	0.485512	0	0	0	0	0.111277	0	0	1.60712e-05	6.42849e-05	0.00170355	0
S84	D3H2	Homogenised	Homogenised	Homogenised	Homogenised	3	Homogenised	rice	NA	16	homogenised_rice_16h_	0.0290214	2.77982e-05	0	0.0999208	0.331008	0	0.373386	0	0	0	0	0.165969	0	0	1.38991e-05	2.77982e-05	0.00062546	0
S85	D3H3	Homogenised	Homogenised	Homogenised	Homogenised	3	Homogenised	rice	NA	16	homogenised_rice_16h_	0.0291317	0	0	0.110593	0.332504	0	0.385621	1.57384e-05	1.57384e-05	0	0	0.141283	0	0	1.57384e-05	3.14767e-05	0.000786918	0
S86	215	D20	40.8	Long	Smoosher	4	chewed	rice	NA	16	chewed_rice_16h_D20	0.029787	0	0	0.223367	0.23511	0	0.299407	0	0	0	0	0.211512	0	0	0	5.63881e-05	0.000761239	0
S87	216	D20	40.8	Long	Smoosher	4	chewed	rice	NA	16	chewed_rice_16h_D20	0.0243519	1.15686e-05	0	0.27443	0.267327	0	0.26241	0	0	0	0	0.170405	0	0	1.15686e-05	2.31372e-05	0.0010296	0
S88	218	D20	40.8	Long	Smoosher	4	chewed	rice	NA	16	chewed_rice_16h_D20	0.033946	0	1.42931e-05	0.231733	0.248928	0	0.317792	1.42931e-05	0	0	0	0.166243	0	0	1.42931e-05	5.71723e-05	0.00125779	0
S89	225	D21	16.7	Short	Cruncher	4	chewed	rice	NA	16	chewed_rice_16h_D21	0.0259838	0	0	0.236844	0.259934	0	0.285278	0	1.599e-05	0	0	0.190489	0	0	3.198e-05	4.79701e-05	0.00137514	0
S90	228	D21	16.7	Short	Cruncher	4	chewed	rice	NA	16	chewed_rice_16h_D21	0.0240257	0	0	0.258592	0.238319	0	0.275705	0	0	0	0	0.202322	0	0	0	0.000134743	0.000901741	0
S91	229	D21	16.7	Short	Cruncher	4	chewed	rice	NA	16	chewed_rice_16h_D21	0.0357186	0	0	0.244089	0.219293	0	0.296367	0	0	0	0	0.203074	0	0	1.21492e-05	0.000109343	0.00133641	0
S92	236	D22	19.2	Short	Chewer	4	chewed	rice	NA	16	chewed_rice_16h_D22	0.0307726	0	0	0.256097	0.242092	0	0.278609	1.03507e-05	0	0	0	0.191436	0	0	1.03507e-05	0.000103507	0.000869457	0
S93	238	D22	19.2	Short	Chewer	4	chewed	rice	NA	16	chewed_rice_16h_D22	0.0310468	5.98666e-05	0	0.265293	0.28384	0	0.254445	0	0	0	0	0.16425	0	0	1.19733e-05	1.19733e-05	0.00104168	0
S94	239	D22	19.2	Short	Chewer	4	chewed	rice	NA	16	chewed_rice_16h_D22	0.0313707	3.31614e-05	0	0.266137	0.253055	0	0.296662	0	0	0	0	0.151896	0	0	1.65807e-05	1.65807e-05	0.000812455	0
S95	248	D23	14.7	Short	Chewer	4	chewed	rice	NA	16	chewed_rice_16h_D23	0.0328579	0	1.23805e-05	0.243389	0.240195	1.23805e-05	0.287686	0	0	0	0	0.194808	0	0	0	8.66637e-05	0.000953301	0
S96	249	D23	14.7	Short	Chewer	4	chewed	rice	NA	16	chewed_rice_16h_D23	0.0300196	0	0	0.220586	0.269438	0	0.294679	0	0	0	0	0.184272	0	0	1.27418e-05	3.82253e-05	0.000955633	0
S97	251	D23	14.7	Short	Chewer	4	chewed	rice	NA	16	chewed_rice_16h_D23	0.0277831	5.93023e-05	0	0.246861	0.264103	0	0.295162	0	0	0	0	0.165127	0	0	0	1.48256e-05	0.000889535	0
S98	258	D24	26.1	Med	Smoosher	4	chewed	rice	NA	16	chewed_rice_16h_D24	0.0309916	1.34454e-05	0	0.0995899	0.30357	0	0.3712	0	0	0	0	0.194084	0	0	4.03361e-05	1.34454e-05	0.000497479	0
S99	260	D24	26.1	Med	Smoosher	4	chewed	rice	NA	16	chewed_rice_16h_D24	0.0257892	0	0	0.130076	0.291269	0	0.38668	0	0	0	0	0.165662	0	0	0	3.13991e-05	0.00049192	0
S100	262	D24	26.1	Med	Smoosher	4	chewed	rice	NA	16	chewed_rice_16h_D24	0.0264452	0	0	0.139666	0.268276	0	0.401764	0	0	0	0	0.163432	0	0	0	1.3008e-05	0.000403247	0
S101	270	D25	14.9	Short	Cruncher	5	chewed	rice	NA	16	chewed_rice_16h_D25	0.0180004	1.40958e-05	0	0.281832	0.268807	0	0.304202	0	0	0	0	0.126552	0	0	2.81916e-05	1.40958e-05	0.000549737	0
S102	271	D25	14.9	Short	Cruncher	5	chewed	rice	NA	16	chewed_rice_16h_D25	0.0216063	0	0	0.244584	0.29938	0	0.279554	0	0	0	0	0.154259	0	0	0	1.16413e-05	0.000605348	0
S103	272	D25	14.9	Short	Cruncher	5	chewed	rice	NA	16	chewed_rice_16h_D25	0.0251654	0	0	0.235048	0.275501	1.22103e-05	0.316198	0	0	0	0	0.147281	0	0	1.22103e-05	8.54722e-05	0.000695988	0
S104	280	D26	25.6	Med	Chewer	5	chewed	rice	NA	16	chewed_rice_16h_D26	0.0334947	3.41e-05	0	0.23038	0.227728	8.525e-06	0.331299	0	0	0	0	0.176382	0	0	0	2.5575e-05	0.0006479	0
S105	283	D26	25.6	Med	Chewer	5	chewed	rice	NA	16	chewed_rice_16h_D26	0.0368702	3.29591e-05	0	0.241634	0.266166	0	0.284788	0	0	0	0	0.16964	0	0	0	2.19727e-05	0.000845949	0
S106	284	D26	25.6	Med	Chewer	5	chewed	rice	NA	16	chewed_rice_16h_D26	0.0272494	2.23631e-05	0	0.24775	0.265841	0	0.311082	0	0	0	0	0.147037	0	0	0	0.000122997	0.000894524	0
S107	292	D27	41.3	Long	Chewer	5	chewed	rice	NA	16	chewed_rice_16h_D27	0.0318651	1.04923e-05	0	0.136536	0.220611	0	0.430635	0	0	0	0	0.179597	0	0	0	5.24615e-05	0.000692492	0
S108	293	D27	41.3	Long	Chewer	5	chewed	rice	NA	16	chewed_rice_16h_D27	0.0325187	0	0	0.156585	0.215723	0	0.409985	0	0	0	1.0905e-05	0.184382	0	0	0	4.362e-05	0.000752445	0
S109	294	D27	41.3	Long	Chewer	5	chewed	rice	NA	16	chewed_rice_16h_D27	0.0302635	1.13431e-05	0	0.208555	0.182715	0	0.397532	1.13431e-05	0	0	0	0.180095	0	0	1.13431e-05	4.53726e-05	0.00075999	0
S110	313	D29	29	Long	Cruncher	5	chewed	rice	NA	16	chewed_rice_16h_D29	0.0307782	0	0	0.187565	0.181121	0	0.411097	1.1632e-05	0	0	0	0.18888	0	0	0	0.000104688	0.000442015	0
S111	315	D29	29	Long	Cruncher	5	chewed	rice	NA	16	chewed_rice_16h_D29	0.0284908	9.79403e-06	0	0.166391	0.218573	0	0.410654	0	0	0	0	0.175176	0	0	1.95881e-05	1.95881e-05	0.000665994	0
S112	317	D29	29	Long	Cruncher	5	chewed	rice	NA	16	chewed_rice_16h_D29	0.0393173	0	0	0.208236	0.199767	0	0.378809	0	0	0	0	0.173069	0	0	0	0	0.000801603	0
S116	Pos A rpt	NA			NA	NA	NA	NA	inulin GR	16	inulin_GR	0.0220901	9.93929e-05	8.28274e-06	0.0568941	0.229283	8.28274e-06	0.46467	0	0	0	0	0.226284	0	0	1.65655e-05	0.000149089	0.000496964	0
S117	Pos B rpt	NA			NA	NA	NA	NA	inulin GR	16	inulin_GR	0.0266514	1.83486e-05	0	0.222413	0.258615	1.83486e-05	0.238459	0	0	0	0	0.253119	0	0	0	6.42202e-05	0.000642202	0
S118	Blank 0 h	NA			NA	NA	NA	NA	water	0	Blank_0h	0.0184733	0	1.41884e-05	0.031328	0.362273	0.000482406	0.557804	0	0	0	0	0.0281498	0	0	7.09421e-05	0	0.00140465	0

## Sheet: BiomSummary
Num samples: 118
Num observations: 1046988
Total count: 12793338
Table density (fraction of non-zero values): 0.012
Counts/sample summary:
Min: 44886.0
Max: 322456.0
Median: 80371.000
Mean: 108418.119
Std. dev.: 63825.743
Sample Metadata Categories: None provided
Observation Metadata Categories: taxonomy
Counts/sample detail:
S15: 44886.0		S15: 44886.0		1	75411		44886
S19: 45301.0		S19: 45301.0		2	54879		45301
S16: 45464.0		S16: 45464.0		3	51264		45464
S42: 46631.0		S42: 46631.0		4	50075		46631
S6: 48801.0		S6: 48801.0		5	63051		48801
S4: 50075.0		S4: 50075.0		6	48801		50075
S3: 51264.0		S3: 51264.0		7	63998		51264
S22: 52014.0		S22: 52014.0		8	70645		52014
S18: 53249.0		S18: 53249.0		9	68299		53249
S2: 54879.0		S2: 54879.0		10	61535		54879
S82: 55920.0		S82: 55920.0		11	79665		55920
S21: 57659.0		S21: 57659.0		12	89890		57659
S63: 59848.0		S63: 59848.0		13	83050		59848
S26: 60387.0		S26: 60387.0		14	66782		60387
S52: 61101.0		S52: 61101.0		15	44886		61101
S10: 61535.0		S10: 61535.0		16	45464		61535
S40: 61620.0		S40: 61620.0		17	67188		61620
S58: 62121.0		S58: 62121.0		18	53249		62121
S46: 62714.0		S46: 62714.0		19	45301		62714
S54: 63011.0		S54: 63011.0		20	69768		63011
S5: 63051.0		S5: 63051.0		21	57659		63051
S7: 63998.0		S7: 63998.0		22	52014		63998
S50: 64195.0		S50: 64195.0		23	81788		64195
S27: 64203.0		S27: 64203.0		24	64877		64203
S84: 64474.0		S84: 64474.0		25	89205		64474
S39: 64522.0		S39: 64522.0		26	60387		64522
S48: 64639.0		S48: 64639.0		27	64203		64639
S24: 64877.0		S24: 64877.0		28	68801		64877
S41: 65558.0		S41: 65558.0		29	77267		65558
S34: 65915.0		S34: 65915.0		30	72388		65915
S14: 66782.0		S14: 66782.0		31	76717		66782
S66: 66964.0		S66: 66964.0		32	83682		66964
S17: 67188.0		S17: 67188.0		33	77226		67188
S36: 67679.0		S36: 67679.0		34	65915		67679
S87: 68224.0		S87: 68224.0		35	90651		68224
S9: 68299.0		S9: 68299.0		36	67679		68299
S28: 68801.0		S28: 68801.0		37	79555		68801
S57: 69361.0		S57: 69361.0		38	70028		69361
S20: 69768.0		S20: 69768.0		39	64522		69768
S38: 70028.0		S38: 70028.0		40	61620		70028
S55: 70398.0		S55: 70398.0		41	65558		70398
S45: 70443.0		S45: 70443.0		42	46631		70443
S8: 70645.0		S8: 70645.0		43	73545		70645
S70: 70859.0		S70: 70859.0		44	84807		70859
S53: 71172.0		S53: 71172.0		45	70443		71172
S30: 72388.0		S30: 72388.0		46	62714		72388
S43: 73545.0		S43: 73545.0		47	80591		73545
S67: 73843.0		S67: 73843.0		48	64639		73843
S1: 75411.0		S1: 75411.0		49	106803		75411
S31: 76717.0		S31: 76717.0		50	64195		76717
S69: 76833.0		S69: 76833.0		51	78167		76833
S81: 76949.0		S81: 76949.0		52	61101		76949
S33: 77226.0		S33: 77226.0		53	71172		77226
S29: 77267.0		S29: 77267.0		54	63011		77267
S65: 77975.0		S65: 77975.0		55	70398		77975
S51: 78167.0		S51: 78167.0		56	85891		78167
S37: 79555.0		S37: 79555.0		57	69361		79555
S11: 79665.0		S11: 79665.0		58	62121		79665
S64: 80151.0		S64: 80151.0		59	96046		80151
S47: 80591.0		S47: 80591.0		60	81678		80591
S60: 81678.0		S60: 81678.0		61	96029		81678
S23: 81788.0		S23: 81788.0		62	82930		81788
S72: 81833.0		S72: 81833.0		63	59848		81833
S62: 82930.0		S62: 82930.0		64	80151		82930
S13: 83050.0		S13: 83050.0		65	77975		83050
S32: 83682.0		S32: 83682.0		66	66964		83682
S83: 84345.0		S83: 84345.0		67	73843		84345
S44: 84807.0		S44: 84807.0		68	95031		84807
S79: 85698.0		S79: 85698.0		69	76833		85698
S71: 85824.0		S71: 85824.0		70	70859		85824
S56: 85891.0		S56: 85891.0		71	85824		85891
S78: 88012.0		S78: 88012.0		72	81833		88012
S25: 89205.0		S25: 89205.0		73	117079		89205
S75: 89476.0		S75: 89476.0		74	90940		89476
S12: 89890.0		S12: 89890.0		75	89476		89890
S35: 90651.0		S35: 90651.0		76	95428		90651
S74: 90940.0		S74: 90940.0		77	91621		90940
S77: 91621.0		S77: 91621.0		78	88012		91621
S68: 95031.0		S68: 95031.0		79	85698		95031
S76: 95428.0		S76: 95428.0		80	101798		95428
S61: 96029.0		S61: 96029.0		81	76949		96029
S59: 96046.0		S59: 96046.0		82	55920		96046
S80: 101798.0		S80: 101798.0		83	84345		101798
S49: 106803.0		S49: 106803.0		84	64474		106803
S86: 108408.0		S86: 108408.0		85	120158		108408
S73: 117079.0		S73: 117079.0		86	108408		117079
S85: 120158.0		S85: 120158.0		87	68224		120158
S105: 136841.0		S105: 136841.0		88	279710		136841
S103: 141375.0		S103: 141375.0		89	177692		141375
S102: 143330.0		S102: 143330.0		90	174564		143330
S101: 168110.0		S101: 168110.0		91	186982		168110
S108: 170099.0		S108: 170099.0		92	208237		170099
S115: 170383.0		S115: 170383.0		93	254209		172349
S109: 172349.0		S109: 172349.0		94	211605		173528
S106: 173528.0		S106: 173528.0		95	269652		174564
S90: 174564.0		S90: 174564.0		96	212415		177692
S89: 177692.0		S89: 177692.0		97	202047		183974
S107: 183974.0		S107: 183974.0		98	304084		184288
S104: 184288.0		S104: 184288.0		99	273946		186982
S91: 186982.0		S91: 186982.0		100	190758		190758
S114: 188379.0		S114: 188379.0		101	168110		193561
S100: 190758.0		S100: 190758.0		102	143330		195501
S117: 193561.0		S117: 193561.0		103	141375		202047
S118: 195501.0		S118: 195501.0		104	184288		208237
S97: 202047.0		S97: 202047.0		105	136841		210664
S92: 208237.0		S92: 208237.0		106	173528		211605
S116: 210664.0		S116: 210664.0		107	183974		212415
S94: 211605.0		S94: 211605.0		108	170099		220747
S96: 212415.0		S96: 212415.0		109	172349		229764
S113: 217181.0		S113: 217181.0		110	220747		254209
S110: 220747.0		S110: 220747.0		111	229764		269652
S111: 229764.0		S111: 229764.0		112	322456		273946
S93: 254209.0		S93: 254209.0	Delete	113	217181		279710
S95: 269652.0		S95: 269652.0		114	188379		304084
S99: 273946.0		S99: 273946.0		115	170383		322456
S88: 279710.0		S88: 279710.0		116	210664		12217395
S98: 304084.0		S98: 304084.0		117	193561
S112: 322456.0		S112: 322456.0		118	195501
			SUM	deleting highlighted	12217395
				with all	12793338
		S113, 114,115 were deleted before further analysis as the volunteer was of a different ethnic group, which might confound chewing behavior

## Sheet: L2
# Constructed from biom file
#OTU ID	S1	S2	S3	S4	S5	S6	S7	S8	S9	S10	S11	S12	S13	S14	S15	S16	S17	S18	S19	S20	S21	S22	S23	S24	S25	S26	S27	S28	S29	S30	S31	S32	S33	S34	S35	S36	S37	S38	S39	S40	S41	S42	S43	S44	S45	S46	S47	S48	S49
Unassigned;Other	0.0146158	0.0147135	0.0133974	0.0171853	0.0147487	0.0150563	0.0139768	0.0138537	0.0145972	0.0132695	0.0160655	0.0210804	0.0131215	0.0105797	0.00875586	0.00869915	0.00768038	0.00509919	0.00879985	0.00919711	0.0116857	0.00746096	0.00910225	0.0123379	0.00934504	0.00886945	0.00702848	0.00923327	0.00701924	0.0080353	0.00746547	0.0312069	0.033074	0.0329602	0.0389605	0.0265209	0.0384988	0.0307592	0.0315646	0.0284955	0.0282289	0.0269592	0.0351838	0.0356252	0.033581	0.0312403	0.0354738	0.0290597	0.0361547
k__Archaea;p__Euryarchaeota	4.98954e-05	7.28393e-05	7.41133e-05	5.32547e-06	0	1.17596e-05	1.4137e-05	2.58879e-05	2.81528e-05	0	9.83403e-06	3.63581e-06	5.22977e-06	0	6.96568e-06	2.8244e-05	1.62605e-05	7.2638e-05	0	5.42602e-06	0	1.7378e-05	1.80869e-05	1.73712e-05	2.16822e-05	0	1.59015e-05	5.85868e-06	0	0	0	5.25811e-05	7.22139e-05	9.64878e-05	0	0	0	1.54725e-05	0	5.81243e-05	1.6094e-05	1.24869e-05	0	3.58042e-05	0	0	0	4.43885e-05	1.85981e-05
k__Bacteria;Other	0	1.12061e-05	0	0	0	0	0	0	0	0	0	7.27162e-06	0	0	0	0	0	0	0	0	5.86631e-06	0	0	0	0	0	0	0	0	0	0	0	0	0	0	0	0	0	0	0	0	0	0	0	0	0	0	0	0
k__Bacteria;p__Actinobacteria	0.321301	0.303846	0.298945	0.131464	0.149506	0.118859	0.283254	0.30176	0.258832	0.141398	0.0815569	0.214036	0.191802	0.295649	0.306218	0.0614378	0.0505214	0.113192	0.294153	0.271448	0.219529	0.050541	0.326745	0.304383	0.369025	0.182953	0.164735	0.152947	0.190625	0.252433	0.323304	0.324741	0.275279	0.322983	0.150601	0.271651	0.168571	0.242562	0.279097	0.263841	0.240653	0.138542	0.115006	0.114048	0.100817	0.115123	0.218356	0.242953	0.240548
k__Bacteria;p__Bacteroidetes	0.223407	0.231511	0.22189	0.306486	0.268448	0.328854	0.258985	0.232159	0.269816	0.29757	0.419081	0.26821	0.232882	0.231049	0.216396	0.184899	0.167944	0.19982	0.190604	0.202684	0.251553	0.220342	0.198314	0.214283	0.186947	0.260424	0.27154	0.263482	0.18803	0.127254	0.177194	0.220722	0.260385	0.191451	0.246816	0.223995	0.230448	0.262521	0.256828	0.258305	0.18022	0.286612	0.277008	0.268985	0.295006	0.297236	0.250823	0.215935	0.221336
k__Bacteria;p__Cyanobacteria	3.56396e-06	5.60303e-06	1.71031e-05	0	0	0	0	0.000218198	4.22291e-05	3.46334e-05	3.60581e-05	0.000105438	4.18382e-05	1.78109e-05	0	7.061e-06	5.96219e-05	1.45276e-05	0	0	5.86631e-06	5.79267e-06	2.71304e-05	1.30284e-05	2.47797e-05	4.59795e-06	1.59015e-05	1.17174e-05	0	1.03215e-05	0	1.31453e-05	0	0	0	0	0	0	0	0	0	0	0	0	0	0	0	0	1.85981e-05
k__Bacteria;p__Firmicutes	0.380759	0.376955	0.396142	0.405774	0.511029	0.395692	0.346126	0.396706	0.341943	0.431611	0.326798	0.325674	0.41357	0.261862	0.263191	0.501472	0.465056	0.671909	0.203479	0.252495	0.256657	0.457157	0.389936	0.38555	0.362186	0.407071	0.39968	0.419593	0.376559	0.379548	0.241849	0.353174	0.298659	0.390892	0.421486	0.330346	0.448278	0.313255	0.30805	0.304194	0.393385	0.40204	0.404189	0.397129	0.384372	0.396838	0.333798	0.317053	0.371683
k__Bacteria;p__Fusobacteria	0	0	0	0	0	0	0	3.69827e-06	0	0	3.27801e-06	0	0	0	0	0	0	7.2638e-06	0	0	0	0	4.52174e-06	0	0	0	0	0	0	0	0	0	0	0	0	0	2.01882e-05	0	0	0	0	0	0	0	2.96652e-05	4.42184e-05	2.17898e-05	0	0
k__Bacteria;p__Lentisphaerae	0	0	0	0	0	0	0	0	0	0	0	0	0	5.93697e-06	0	0	0	0	0	1.62781e-05	0	0	4.52174e-06	0	0	0	0	0	0	0	0	0	0	0	0	0	0	0	0	0	0	0	1.1019e-05	0	0	0	0	0	0
k__Bacteria;p__OD1	0	0	0	0	0	0	0	0	0	0	0	0	0	0	0	0	0	0	0	0	0	0	0	0	3.09746e-06	0	0	0	0	0	0	0	0	0	0	0	0	0	0	0	0	0	0	0	0	0	0	0	0
k__Bacteria;p__Planctomycetes	0	0	0	0	0	0	0	0	0	0	0	0	0	0	0	0	0	0	0	0	0	0	0	0	0	0	0	0	0	0	0	0	0	0	0	0	0	0	0	0	0	0	0	0	0	0	0	0	0
k__Bacteria;p__Proteobacteria	0.058677	0.0713097	0.068247	0.138015	0.0555457	0.140677	0.0970411	0.0542942	0.114197	0.115196	0.155702	0.168865	0.148243	0.200313	0.205028	0.24311	0.308608	0.0080265	0.302913	0.263808	0.260153	0.264175	0.0752733	0.0825002	0.0720934	0.140472	0.156683	0.154405	0.237625	0.232513	0.249897	0.0680136	0.130779	0.0598804	0.140851	0.145928	0.113316	0.14999	0.123605	0.143829	0.15624	0.145347	0.167776	0.18327	0.18517	0.158678	0.158303	0.193652	0.128922
k__Bacteria;p__SAR406	0	0	0	0	0	0	0	0	0	0	0	0	0	0	0	0	0	0	0	0	0	0	0	0	0	0	0	0	0	0	0	0	0	0	0	0	0	0	0	0	0	0	0	0	0	0	0	0	0
k__Bacteria;p__Synergistetes	0	5.60303e-06	0	0	0	0	0	0	0	0	0	0	0	0	0	0	0	0	0	0	0	0	0	0	0	0	0	0	0	0	0	0	0	0	0	0	0	0	0	0	0	0	0	0	0	0	0	0	0
k__Bacteria;p__TM7	3.56396e-06	3.36182e-05	3.42062e-05	1.59764e-05	0	1.95994e-05	0	2.21896e-05	0	9.89526e-06	3.27801e-06	1.8179e-05	0	1.18739e-05	1.39314e-05	2.8244e-05	1.08403e-05	5.08466e-05	1.15106e-05	1.62781e-05	1.17326e-05	1.7378e-05	1.35652e-05	3.03996e-05	1.54873e-05	4.59795e-06	2.12021e-05	1.7576e-05	1.42282e-05	5.16076e-06	3.57689e-05	1.31453e-05	1.80535e-05	0	1.97769e-05	1.57488e-05	0	0	0	1.45311e-05	0	0	0	0	1.48326e-05	2.21092e-05	0	0	0
k__Bacteria;p__Tenericutes	4.27675e-05	5.60303e-05	5.13092e-05	1.59764e-05	4.78389e-05	3.52789e-05	3.76987e-05	3.69827e-05	4.69213e-06	2.96858e-05	4.58922e-05	5.09013e-05	1.04595e-05	1.18739e-05	1.39314e-05	2.8244e-05	4.33614e-05	7.99018e-05	0	1.0852e-05	1.75989e-05	4.63414e-05	2.71304e-05	3.47424e-05	3.09746e-06	0	4.24041e-05	1.7576e-05	0	5.16076e-06	5.10984e-06	0.000131453	7.22139e-05	5.78927e-05	1.97769e-05	0.000110241	0	7.73623e-05	5.61648e-05	2.90622e-05	1.6094e-05	4.99476e-05	7.71333e-05	2.38695e-05	4.44978e-05	8.84369e-05	4.35796e-05	8.87771e-05	1.85981e-05
k__Bacteria;p__Verrucomicrobia	0.00114047	0.0014792	0.00120292	0.00103314	0.000674528	0.000795735	0.00056548	0.000920868	0.000539595	0.000880678	0.000698216	0.00194879	0.000324246	0.000498706	0.000376147	0.000289501	5.96219e-05	0.00172878	4.02871e-05	0.000320135	0.000357845	0.000237499	0.00052	0.000846847	0.000334526	0.00020231	0.000238523	0.000287075	0.000123311	0.000196109	0.000250382	0.00193235	0.00166092	0.00167889	0.00124595	0.00143314	0.000868091	0.00082004	0.000800348	0.00123514	0.00123924	0.000437041	0.000749295	0.000883171	0.00096412	0.000729604	0.00318131	0.00121329	0.00130187
k__Bacteria;p__[Thermi]	0	0	0	5.32547e-06	0	0	0	0	0	0	0	0	0	0	0	0	0	0	0	0	2.34652e-05	0	1.35652e-05	4.3428e-06	0	0	0	0	4.74273e-06	0	0	0	0	0	0	0	0	0	0	0	0	0	0	0	0	0	0	0	0
[truncated: 66 more columns]

## Sheet: L3
# Constructed from biom file
#OTU ID	S1	S2	S3	S4	S5	S6	S7	S8	S9	S10	S11	S12	S13	S14	S15	S16	S17	S18	S19	S20	S21	S22	S23	S24	S25	S26	S27	S28	S29	S30	S31	S32	S33	S34	S35	S36	S37	S38	S39	S40	S41	S42	S43	S44	S45	S46	S47	S48	S49
Unassigned;Other;Other	0.0146158	0.0147135	0.0133974	0.0171853	0.0147487	0.0150563	0.0139768	0.0138537	0.0145972	0.0132695	0.0160655	0.0210804	0.0131215	0.0105797	0.00875586	0.00869915	0.00768038	0.00509919	0.00879985	0.00919711	0.0116857	0.00746096	0.00910225	0.0123379	0.00934504	0.00886945	0.00702848	0.00923327	0.00701924	0.0080353	0.00746547	0.0312069	0.033074	0.0329602	0.0389605	0.0265209	0.0384988	0.0307592	0.0315646	0.0284955	0.0282289	0.0269592	0.0351838	0.0356252	0.033581	0.0312403	0.0354738	0.0290597	0.0361547
k__Archaea;p__Euryarchaeota;c__Methanobacteria	4.98954e-05	7.28393e-05	7.41133e-05	5.32547e-06	0	1.17596e-05	1.4137e-05	2.58879e-05	2.81528e-05	0	9.83403e-06	3.63581e-06	5.22977e-06	0	6.96568e-06	2.8244e-05	1.62605e-05	7.2638e-05	0	5.42602e-06	0	1.7378e-05	1.80869e-05	1.73712e-05	2.16822e-05	0	1.59015e-05	5.85868e-06	0	0	0	5.25811e-05	7.22139e-05	9.64878e-05	0	0	0	1.54725e-05	0	5.81243e-05	1.6094e-05	1.24869e-05	0	3.58042e-05	0	0	0	4.43885e-05	1.85981e-05
k__Bacteria;Other;Other	0	1.12061e-05	0	0	0	0	0	0	0	0	0	7.27162e-06	0	0	0	0	0	0	0	0	5.86631e-06	0	0	0	0	0	0	0	0	0	0	0	0	0	0	0	0	0	0	0	0	0	0	0	0	0	0	0	0
k__Bacteria;p__Actinobacteria;Other	0	0	0	0	0	0	0	0	0	0	0	0	0	0	0	0	0	0	0	0	0	0	0	0	0	0	0	0	0	0	0	0	0	0	0	0	0	1.54725e-05	0	0	0	0	0	0	0	0	0	0	0
k__Bacteria;p__Actinobacteria;c__Actinobacteria	0.264339	0.253447	0.248166	0.0801696	0.0996053	0.073776	0.2313	0.2543	0.213487	0.108506	0.0476164	0.161826	0.125525	0.247465	0.245289	0.0397676	0.0314912	0.0696816	0.282263	0.256618	0.206752	0.0329082	0.286289	0.252773	0.314656	0.120195	0.105427	0.109317	0.140228	0.188022	0.25702	0.268992	0.214403	0.26897	0.10106	0.187552	0.114386	0.192168	0.21799	0.204903	0.1705	0.0810649	0.0683731	0.0710356	0.0491553	0.0603361	0.163293	0.179108	0.184233
k__Bacteria;p__Actinobacteria;c__Coriobacteriia	0.0569627	0.0503992	0.050779	0.0512949	0.0499007	0.0450825	0.0519535	0.0474451	0.0453447	0.0328869	0.0339405	0.0522102	0.0662769	0.0481845	0.0609288	0.0216702	0.0190302	0.0435102	0.0118904	0.0148293	0.0127768	0.0176329	0.040456	0.0516099	0.0543697	0.0627529	0.0593074	0.0436296	0.0503963	0.0644063	0.0662848	0.0557491	0.0608763	0.0540139	0.0495412	0.0840985	0.054185	0.0503783	0.0611073	0.0589381	0.0701537	0.0574771	0.0466326	0.0430128	0.051662	0.0547866	0.0550629	0.0638455	0.056315
k__Bacteria;p__Actinobacteria;c__OPB41	0	0	0	0	0	0	0	0	0	0	0	0	0	0	0	0	0	0	0	0	0	0	0	0	0	4.59795e-06	0	0	0	0	0	0	0	0	0	0	0	0	0	0	0	0	0	0	0	0	0	0	0
k__Bacteria;p__Actinobacteria;c__Thermoleophilia	0	0	0	0	0	0	0	1.47931e-05	0	4.94763e-06	0	0	0	0	0	0	0	0	0	0	0	0	0	0	0	0	0	0	0	5.16076e-06	0	0	0	0	0	0	0	0	0	0	0	0	0	0	0	0	0	0	0
k__Bacteria;p__Bacteroidetes;c__Bacteroidia	0.223407	0.231511	0.22189	0.306486	0.268448	0.328854	0.258985	0.232096	0.269816	0.29757	0.419081	0.26821	0.232882	0.231049	0.216396	0.184899	0.167944	0.19982	0.190604	0.202684	0.251553	0.220342	0.19831	0.214278	0.186938	0.260424	0.27154	0.263471	0.188021	0.127254	0.177194	0.220722	0.260367	0.191432	0.246816	0.223995	0.230448	0.262521	0.256828	0.258305	0.180204	0.286599	0.277008	0.268985	0.295006	0.297236	0.250823	0.215935	0.221336
k__Bacteria;p__Bacteroidetes;c__Cytophagia	0	0	0	0	0	0	0	2.58879e-05	0	0	0	0	0	0	0	0	0	0	0	0	0	0	0	0	0	0	0	0	0	0	0	0	0	0	0	0	0	0	0	0	0	0	0	0	0	0	0	0	0
k__Bacteria;p__Bacteroidetes;c__Flavobacteriia	0	0	0	0	0	0	0	3.69827e-06	0	0	0	0	0	0	0	0	0	0	0	0	0	0	4.52174e-06	0	3.09746e-06	0	0	0	9.48546e-06	0	0	0	0	1.92976e-05	0	0	0	0	0	0	1.6094e-05	1.24869e-05	0	0	0	0	0	0	0
k__Bacteria;p__Bacteroidetes;c__Sphingobacteriia	0	0	0	0	0	0	0	3.32844e-05	0	0	0	0	0	0	0	0	0	0	0	0	0	0	0	0	3.09746e-06	0	0	0	0	0	0	0	1.80535e-05	0	0	0	0	0	0	0	0	0	0	0	0	0	0	0	0
k__Bacteria;p__Bacteroidetes;c__[Saprospirae]	0	0	0	0	0	0	0	0	0	0	0	0	0	0	0	0	0	0	0	0	0	0	0	4.3428e-06	3.09746e-06	0	0	1.17174e-05	0	0	0	0	0	0	0	0	0	0	0	0	0	0	0	0	0	0	0	0	0
k__Bacteria;p__Cyanobacteria;c__4C0d-2	0	0	0	0	0	0	0	3.69827e-05	0	0	0	3.63581e-06	4.18382e-05	1.78109e-05	0	7.061e-06	5.96219e-05	0	0	0	5.86631e-06	5.79267e-06	2.71304e-05	0	2.16822e-05	0	1.59015e-05	5.85868e-06	0	1.03215e-05	0	0	0	0	0	0	0	0	0	0	0	0	0	0	0	0	0	0	1.85981e-05
k__Bacteria;p__Cyanobacteria;c__Chloroplast	3.56396e-06	5.60303e-06	1.71031e-05	0	0	0	0	0.000181215	4.22291e-05	3.46334e-05	3.60581e-05	0.000101803	0	0	0	0	0	1.45276e-05	0	0	0	0	0	1.30284e-05	3.09746e-06	4.59795e-06	0	5.85868e-06	0	0	0	1.31453e-05	0	0	0	0	0	0	0	0	0	0	0	0	0	0	0	0	0
k__Bacteria;p__Firmicutes;Other	0	5.60303e-06	0	5.32547e-06	0	0	4.71234e-06	0	4.69213e-06	0	0	0	0	0	0	0	0	0	0	0	0	0	0	0	0	0	0	0	0	0	0	1.31453e-05	0	0	0	0	0	0	1.40412e-05	0	0	0	1.1019e-05	0	0	0	0	0	0
k__Bacteria;p__Firmicutes;c__Bacilli	0.232017	0.212702	0.235903	0.0430351	0.070725	0.0426287	0.229434	0.274378	0.227221	0.0591093	0.0353861	0.170788	0.057015	0.120141	0.140832	0.0456141	0.0383911	0.0265129	0.108194	0.123703	0.155387	0.061773	0.221954	0.205319	0.219486	0.0375423	0.0351742	0.044274	0.057112	0.104846	0.114246	0.204199	0.146594	0.240911	0.0695554	0.163457	0.0709614	0.184772	0.176723	0.16827	0.124197	0.0464762	0.03471	0.0480015	0.0331212	0.0450586	0.184734	0.176666	0.231788
k__Bacteria;p__Firmicutes;c__Clostridia	0.145438	0.160134	0.156265	0.358138	0.435764	0.349046	0.112752	0.12012	0.112053	0.366609	0.288419	0.14965	0.354484	0.139792	0.12105	0.454573	0.426063	0.642163	0.0950545	0.128342	0.100912	0.394747	0.165722	0.177794	0.14139	0.368236	0.36308	0.37345	0.317578	0.272638	0.126157	0.145636	0.14793	0.146507	0.345206	0.157881	0.371644	0.123408	0.127592	0.132727	0.260336	0.353104	0.366912	0.346764	0.348018	0.348574	0.142157	0.133462	0.134966
k__Bacteria;p__Firmicutes;c__Erysipelotrichi	0.00330379	0.00411262	0.00397362	0.00459588	0.00453991	0.00401787	0.0039348	0.00220786	0.00266513	0.00589263	0.00299282	0.00523556	0.00207099	0.00192952	0.00130955	0.0012851	0.000601639	0.00323239	0.000230212	0.00045036	0.000357845	0.000637194	0.00226087	0.00243631	0.00131023	0.00129203	0.00142584	0.00186892	0.00186864	0.0020643	0.00144608	0.00332575	0.00413425	0.00347356	0.00672415	0.0090083	0.00567287	0.00507496	0.00372092	0.00319684	0.00885169	0.00245992	0.00255642	0.00236308	0.00323351	0.00320584	0.00690737	0.00692461	0.00492849
k__Bacteria;p__Fusobacteria;c__Fusobacteriia	0	0	0	0	0	0	0	3.69827e-06	0	0	3.27801e-06	0	0	0	0	0	0	7.2638e-06	0	0	0	0	4.52174e-06	0	0	0	0	0	0	0	0	0	0	0	0	0	2.01882e-05	0	0	0	0	0	0	0	2.96652e-05	4.42184e-05	2.17898e-05	0	0
k__Bacteria;p__Lentisphaerae;c__[Lentisphaeria]	0	0	0	0	0	0	0	0	0	0	0	0	0	5.93697e-06	0	0	0	0	0	1.62781e-05	0	0	4.52174e-06	0	0	0	0	0	0	0	0	0	0	0	0	0	0	0	0	0	0	0	1.1019e-05	0	0	0	0	0	0
k__Bacteria;p__OD1;c__ZB2	0	0	0	0	0	0	0	0	0	0	0	0	0	0	0	0	0	0	0	0	0	0	0	0	3.09746e-06	0	0	0	0	0	0	0	0	0	0	0	0	0	0	0	0	0	0	0	0	0	0	0	0
k__Bacteria;p__Planctomycetes;c__Planctomycetia	0	0	0	0	0	0	0	0	0	0	0	0	0	0	0	0	0	0	0	0	0	0	0	0	0	0	0	0	0	0	0	0	0	0	0	0	0	0	0	0	0	0	0	0	0	0	0	0	0
k__Bacteria;p__Proteobacteria;Other	0	0	0	5.32547e-06	0	3.91988e-06	0	3.69827e-06	4.69213e-06	1.48429e-05	3.27801e-06	0	0	0	6.96568e-06	0	5.42017e-06	0	0	0	0	0	0	0	0	0	0	0	0	0	0	0	0	0	0	0	2.01882e-05	0	0	0	1.6094e-05	0	1.1019e-05	2.38695e-05	2.96652e-05	2.21092e-05	0	0	0
k__Bacteria;p__Proteobacteria;c__Alphaproteobacteria	1.06919e-05	2.24121e-05	2.85051e-05	3.72783e-05	2.39194e-05	1.95994e-05	1.4137e-05	0.000654593	8.44583e-05	1.48429e-05	2.29461e-05	2.90865e-05	3.13786e-05	5.34328e-05	7.66225e-05	9.1793e-05	5.96219e-05	7.99018e-05	5.17977e-05	3.25561e-05	0.000105594	5.79267e-05	0.000108522	0.00010857	8.67289e-05	5.97734e-05	3.71036e-05	9.95975e-05	3.79418e-05	9.28936e-05	6.1318e-05	1.31453e-05	0	1.92976e-05	3.95538e-05	3.14976e-05	0	4.64174e-05	2.80824e-05	2.90622e-05	1.6094e-05	0	2.20381e-05	1.19347e-05	1.48326e-05	0	0	2.95924e-05	1.85981e-05
k__Bacteria;p__Proteobacteria;c__Betaproteobacteria	0.00274068	0.00159126	0.00170461	0.00342427	0.00208099	0.00779664	0.0154989	0.0163759	0.0178629	0.00275088	0.0230903	0.00133071	0.00335228	0.000825239	0.000731396	0.00175819	0.0013171	0.00157624	0.000276254	0.000293005	0.000340246	0.00146555	0.00134748	0.00168935	0.00206601	0.00237254	0.00536942	0.00869428	0.00190183	0.000299324	0.000408787	0.00202437	0.00175119	0.00123504	0.00401471	0.00135439	0.00254371	0.00131516	0.00210618	0.00140951	0.00117486	0.00452025	0.00262253	0.00384299	0.0204987	0.0031174	0.00117665	0.000695421	0.00198999
k__Bacteria;p__Proteobacteria;c__Deltaproteobacteria	0.000566669	0.000459448	0.000513092	0.000244971	0.000306169	0.000509584	0.000433535	0.000695274	0.000487981	0.000425496	0.000632656	0.000628995	0.000397463	0.000397777	0.000501529	0.000840259	0.00146345	0.00140191	0.000581285	0.000515472	0.000439973	0.00115274	0.000375304	0.000660106	0.000628785	0.000285073	0.000323331	0.000322227	0.000455302	0.000402539	0.000485434	0.000525811	0.000704086	0.000578927	0.000296654	0.000629951	0.000524892	0.000355866	0.000547607	0.00066843	0.000531102	0.000511962	0.000429743	0.00047739	0.0006823	0.000420075	0.000610115	0.000562255	0.000316167
k__Bacteria;p__Proteobacteria;c__Epsilonproteobacteria	0	5.60303e-06	1.14021e-05	0	4.78389e-06	7.83976e-06	0	3.69827e-06	0	0	3.27801e-06	0	0	1.78109e-05	1.39314e-05	0	0	0	0	0	0	0	0	0	3.09746e-06	0	0	0	0	1.03215e-05	1.02197e-05	0	0	0	0	0	0	0	0	0	0	0	0	1.19347e-05	0	0	2.17898e-05	0	1.85981e-05
k__Bacteria;p__Proteobacteria;c__Gammaproteobacteria	0.0553589	0.069231	0.0659894	0.134303	0.0531299	0.132339	0.0810946	0.0365611	0.0957569	0.11199	0.13195	0.166876	0.144462	0.199019	0.203697	0.24042	0.305763	0.00496844	0.302003	0.262967	0.259267	0.261498	0.073442	0.0800422	0.0693088	0.137755	0.150953	0.145289	0.23523	0.231708	0.248931	0.0654503	0.128324	0.0580471	0.1365	0.143912	0.110227	0.148273	0.120923	0.141722	0.154502	0.140315	0.164691	0.178902	0.163945	0.155118	0.156494	0.192365	0.126579
k__Bacteria;p__SAR406;c__AB16	0	0	0	0	0	0	0	0	0	0	0	0	0	0	0	0	0	0	0	0	0	0	0	0	0	0	0	0	0	0	0	0	0	0	0	0	0	0	0	0	0	0	0	0	0	0	0	0	0
k__Bacteria;p__Synergistetes;c__Synergistia	0	5.60303e-06	0	0	0	0	0	0	0	0	0	0	0	0	0	0	0	0	0	0	0	0	0	0	0	0	0	0	0	0	0	0	0	0	0	0	0	0	0	0	0	0	0	0	0	0	0	0	0
k__Bacteria;p__TM7;c__TM7-1	0	0	1.14021e-05	0	0	0	0	0	0	0	0	0	0	0	0	0	0	0	0	0	5.86631e-06	0	4.52174e-06	8.68561e-06	6.19492e-06	0	1.59015e-05	1.7576e-05	0	0	2.04393e-05	0	0	0	0	0	0	0	0	0	0	0	0	0	0	0	0	0	0
k__Bacteria;p__TM7;c__TM7-3	3.56396e-06	3.36182e-05	2.28041e-05	1.59764e-05	0	1.95994e-05	0	2.21896e-05	0	9.89526e-06	3.27801e-06	1.8179e-05	0	1.18739e-05	1.39314e-05	2.8244e-05	1.08403e-05	5.08466e-05	1.15106e-05	1.62781e-05	5.86631e-06	1.7378e-05	9.04347e-06	2.1714e-05	9.29238e-06	4.59795e-06	5.30051e-06	0	1.42282e-05	5.16076e-06	1.53295e-05	1.31453e-05	1.80535e-05	0	1.97769e-05	1.57488e-05	0	0	0	1.45311e-05	0	0	0	0	1.48326e-05	2.21092e-05	0	0	0
k__Bacteria;p__Tenericutes;c__Mollicutes	3.92035e-05	5.60303e-05	4.56082e-05	1.59764e-05	3.82711e-05	3.52789e-05	3.76987e-05	3.32844e-05	4.69213e-06	2.96858e-05	4.58922e-05	5.09013e-05	5.22977e-06	5.93697e-06	1.39314e-05	2.1183e-05	2.16807e-05	5.81104e-05	0	1.0852e-05	1.75989e-05	4.63414e-05	4.52174e-06	3.47424e-05	3.09746e-06	0	3.71036e-05	0	0	5.16076e-06	5.10984e-06	0.000131453	7.22139e-05	5.78927e-05	1.97769e-05	0.000110241	0	7.73623e-05	5.61648e-05	2.90622e-05	1.6094e-05	4.99476e-05	7.71333e-05	2.38695e-05	4.44978e-05	8.84369e-05	4.35796e-05	8.87771e-05	1.85981e-05
k__Bacteria;p__Tenericutes;c__RF3	3.56396e-06	0	5.70103e-06	0	9.56778e-06	0	0	3.69827e-06	0	0	0	0	5.22977e-06	5.93697e-06	0	7.061e-06	2.16807e-05	2.17914e-05	0	0	0	0	2.26087e-05	0	0	0	5.30051e-06	1.7576e-05	0	0	0	0	0	0	0	0	0	0	0	0	0	0	0	0	0	0	0	0	0
k__Bacteria;p__Verrucomicrobia;c__Opitutae	0	0	0	0	0	0	0	0	0	0	0	0	0	0	0	0	0	0	0	0	0	0	0	0	0	0	0	0	0	0	0	0	0	0	0	0	0	0	0	1.45311e-05	0	0	0	0	0	0	0	0	0
k__Bacteria;p__Verrucomicrobia;c__Verrucomicrobiae	0.00114047	0.0014792	0.00120292	0.00103314	0.000674528	0.000795735	0.00056548	0.000920868	0.000539595	0.000880678	0.000698216	0.00194879	0.000324246	0.000498706	0.000376147	0.000289501	5.96219e-05	0.00172878	4.02871e-05	0.000320135	0.000357845	0.000237499	0.00052	0.000846847	0.000334526	0.00020231	0.000238523	0.000287075	0.000123311	0.000196109	0.000250382	0.00193235	0.00166092	0.00167889	0.00124595	0.00143314	0.000868091	0.00082004	0.000800348	0.00122061	0.00123924	0.000437041	0.000749295	0.000883171	0.00096412	0.000729604	0.00318131	0.00121329	0.00130187
k__Bacteria;p__[Thermi];c__Deinococci	0	0	0	5.32547e-06	0	0	0	0	0	0	0	0	0	0	0	0	0	0	0	0	2.34652e-05	0	1.35652e-05	4.3428e-06	0	0	0	0	4.74273e-06	0	0	0	0	0	0	0	0	0	0	0	0	0	0	0	0	0	0	0	0
[truncated: 66 more columns]

## Sheet: L4
# Constructed from biom file
#OTU ID	S1	S2	S3	S4	S5	S6	S7	S8	S9	S10	S11	S12	S13	S14	S15	S16	S17	S18	S19	S20	S21	S22	S23	S24	S25	S26	S27	S28	S29	S30	S31	S32	S33	S34	S35	S36	S37	S38	S39	S40	S41	S42	S43	S44	S45	S46	S47	S48	S49
Unassigned;Other;Other;Other	0.0146158	0.0147135	0.0133974	0.0171853	0.0147487	0.0150563	0.0139768	0.0138537	0.0145972	0.0132695	0.0160655	0.0210804	0.0131215	0.0105797	0.00875586	0.00869915	0.00768038	0.00509919	0.00879985	0.00919711	0.0116857	0.00746096	0.00910225	0.0123379	0.00934504	0.00886945	0.00702848	0.00923327	0.00701924	0.0080353	0.00746547	0.0312069	0.033074	0.0329602	0.0389605	0.0265209	0.0384988	0.0307592	0.0315646	0.0284955	0.0282289	0.0269592	0.0351838	0.0356252	0.033581	0.0312403	0.0354738	0.0290597	0.0361547
k__Archaea;p__Euryarchaeota;c__Methanobacteria;o__Methanobacteriales	4.98954e-05	7.28393e-05	7.41133e-05	5.32547e-06	0	1.17596e-05	1.4137e-05	2.58879e-05	2.81528e-05	0	9.83403e-06	3.63581e-06	5.22977e-06	0	6.96568e-06	2.8244e-05	1.62605e-05	7.2638e-05	0	5.42602e-06	0	1.7378e-05	1.80869e-05	1.73712e-05	2.16822e-05	0	1.59015e-05	5.85868e-06	0	0	0	5.25811e-05	7.22139e-05	9.64878e-05	0	0	0	1.54725e-05	0	5.81243e-05	1.6094e-05	1.24869e-05	0	3.58042e-05	0	0	0	4.43885e-05	1.85981e-05
k__Bacteria;Other;Other;Other	0	1.12061e-05	0	0	0	0	0	0	0	0	0	7.27162e-06	0	0	0	0	0	0	0	0	5.86631e-06	0	0	0	0	0	0	0	0	0	0	0	0	0	0	0	0	0	0	0	0	0	0	0	0	0	0	0	0
k__Bacteria;p__Actinobacteria;Other;Other	0	0	0	0	0	0	0	0	0	0	0	0	0	0	0	0	0	0	0	0	0	0	0	0	0	0	0	0	0	0	0	0	0	0	0	0	0	1.54725e-05	0	0	0	0	0	0	0	0	0	0	0
k__Bacteria;p__Actinobacteria;c__Actinobacteria;o__Actinomycetales	0.000110483	0.000140076	7.98144e-05	9.58584e-05	5.26228e-05	0.000121516	4.71234e-05	0.000303258	9.38425e-05	9.89526e-05	0.000121286	7.99878e-05	0.000135974	0.000100929	0.000146279	0.000480148	0.000254748	0.000995141	0.000132372	0.000222467	0.000187722	0.000295426	0.00013113	0.000225826	8.98264e-05	0.000151733	0.000159015	9.37388e-05	8.06264e-05	0.000175466	0.000194174	0.00022347	0.000108321	9.64878e-05	9.88846e-05	0.000141739	4.03763e-05	9.28347e-05	0.00011233	0.000203435	0.000144846	0.000187303	0.000132228	0.000262564	0.000177991	0.000132655	0.000174319	0.000207147	9.29904e-05
k__Bacteria;p__Actinobacteria;c__Actinobacteria;o__Bifidobacteriales	0.264228	0.253307	0.248086	0.0800737	0.0995527	0.0736545	0.231253	0.253997	0.213393	0.108408	0.0474951	0.161746	0.125389	0.247364	0.245143	0.0392874	0.0312364	0.0686865	0.28213	0.256396	0.206564	0.0326127	0.286158	0.252547	0.314566	0.120043	0.105268	0.109223	0.140148	0.187846	0.256825	0.268768	0.214295	0.268873	0.100961	0.18741	0.114346	0.192075	0.217877	0.204699	0.170355	0.0808776	0.0682409	0.070773	0.0489773	0.0602034	0.163119	0.178901	0.18414
k__Bacteria;p__Actinobacteria;c__Coriobacteriia;o__Coriobacteriales	0.0569627	0.0503992	0.050779	0.0512949	0.0499007	0.0450825	0.0519535	0.0474451	0.0453447	0.0328869	0.0339405	0.0522102	0.0662769	0.0481845	0.0609288	0.0216702	0.0190302	0.0435102	0.0118904	0.0148293	0.0127768	0.0176329	0.040456	0.0516099	0.0543697	0.0627529	0.0593074	0.0436296	0.0503963	0.0644063	0.0662848	0.0557491	0.0608763	0.0540139	0.0495412	0.0840985	0.054185	0.0503783	0.0611073	0.0589381	0.0701537	0.0574771	0.0466326	0.0430128	0.051662	0.0547866	0.0550629	0.0638455	0.056315
k__Bacteria;p__Actinobacteria;c__OPB41;o__	0	0	0	0	0	0	0	0	0	0	0	0	0	0	0	0	0	0	0	0	0	0	0	0	0	4.59795e-06	0	0	0	0	0	0	0	0	0	0	0	0	0	0	0	0	0	0	0	0	0	0	0
k__Bacteria;p__Actinobacteria;c__Thermoleophilia;o__Solirubrobacterales	0	0	0	0	0	0	0	1.47931e-05	0	4.94763e-06	0	0	0	0	0	0	0	0	0	0	0	0	0	0	0	0	0	0	0	5.16076e-06	0	0	0	0	0	0	0	0	0	0	0	0	0	0	0	0	0	0	0
k__Bacteria;p__Bacteroidetes;c__Bacteroidia;o__Bacteroidales	0.223407	0.231511	0.22189	0.306486	0.268448	0.328854	0.258985	0.232096	0.269816	0.29757	0.419081	0.26821	0.232882	0.231049	0.216396	0.184899	0.167944	0.19982	0.190604	0.202684	0.251553	0.220342	0.19831	0.214278	0.186938	0.260424	0.27154	0.263471	0.188021	0.127254	0.177194	0.220722	0.260367	0.191432	0.246816	0.223995	0.230448	0.262521	0.256828	0.258305	0.180204	0.286599	0.277008	0.268985	0.295006	0.297236	0.250823	0.215935	0.221336
k__Bacteria;p__Bacteroidetes;c__Cytophagia;o__Cytophagales	0	0	0	0	0	0	0	2.58879e-05	0	0	0	0	0	0	0	0	0	0	0	0	0	0	0	0	0	0	0	0	0	0	0	0	0	0	0	0	0	0	0	0	0	0	0	0	0	0	0	0	0
k__Bacteria;p__Bacteroidetes;c__Flavobacteriia;o__Flavobacteriales	0	0	0	0	0	0	0	3.69827e-06	0	0	0	0	0	0	0	0	0	0	0	0	0	0	4.52174e-06	0	3.09746e-06	0	0	0	9.48546e-06	0	0	0	0	1.92976e-05	0	0	0	0	0	0	1.6094e-05	1.24869e-05	0	0	0	0	0	0	0
k__Bacteria;p__Bacteroidetes;c__Sphingobacteriia;o__Sphingobacteriales	0	0	0	0	0	0	0	3.32844e-05	0	0	0	0	0	0	0	0	0	0	0	0	0	0	0	0	3.09746e-06	0	0	0	0	0	0	0	1.80535e-05	0	0	0	0	0	0	0	0	0	0	0	0	0	0	0	0
k__Bacteria;p__Bacteroidetes;c__[Saprospirae];o__[Saprospirales]	0	0	0	0	0	0	0	0	0	0	0	0	0	0	0	0	0	0	0	0	0	0	0	4.3428e-06	3.09746e-06	0	0	1.17174e-05	0	0	0	0	0	0	0	0	0	0	0	0	0	0	0	0	0	0	0	0	0
k__Bacteria;p__Cyanobacteria;c__4C0d-2;o__YS2	0	0	0	0	0	0	0	3.69827e-05	0	0	0	3.63581e-06	4.18382e-05	1.78109e-05	0	7.061e-06	5.96219e-05	0	0	0	5.86631e-06	5.79267e-06	2.71304e-05	0	2.16822e-05	0	1.59015e-05	5.85868e-06	0	1.03215e-05	0	0	0	0	0	0	0	0	0	0	0	0	0	0	0	0	0	0	1.85981e-05
k__Bacteria;p__Cyanobacteria;c__Chloroplast;o__Cryptophyta	0	0	0	0	0	0	0	0	0	0	0	0	0	0	0	0	0	0	0	0	0	0	0	0	0	0	0	0	0	0	0	0	0	0	0	0	0	0	0	0	0	0	0	0	0	0	0	0	0
k__Bacteria;p__Cyanobacteria;c__Chloroplast;o__Stramenopiles	0	0	0	0	0	0	0	0	0	0	0	0	0	0	0	0	0	0	0	0	0	0	0	0	0	0	0	0	0	0	0	0	0	0	0	0	0	0	0	0	0	0	0	0	0	0	0	0	0
k__Bacteria;p__Cyanobacteria;c__Chloroplast;o__Streptophyta	3.56396e-06	5.60303e-06	1.71031e-05	0	0	0	0	0.000181215	4.22291e-05	3.46334e-05	3.60581e-05	0.000101803	0	0	0	0	0	1.45276e-05	0	0	0	0	0	1.30284e-05	3.09746e-06	4.59795e-06	0	5.85868e-06	0	0	0	1.31453e-05	0	0	0	0	0	0	0	0	0	0	0	0	0	0	0	0	0
k__Bacteria;p__Firmicutes;Other;Other	0	5.60303e-06	0	5.32547e-06	0	0	4.71234e-06	0	4.69213e-06	0	0	0	0	0	0	0	0	0	0	0	0	0	0	0	0	0	0	0	0	0	0	1.31453e-05	0	0	0	0	0	0	1.40412e-05	0	0	0	1.1019e-05	0	0	0	0	0	0
k__Bacteria;p__Firmicutes;c__Bacilli;Other	0	0	0	0	0	0	0	0	0	0	0	3.63581e-06	0	0	0	0	0	0	0	0	0	0	0	0	0	0	0	0	0	0	0	0	0	1.92976e-05	0	0	0	0	0	0	0	0	0	1.19347e-05	0	2.21092e-05	0	0	0
k__Bacteria;p__Firmicutes;c__Bacilli;o__Bacillales	0.0358213	0.0458888	0.0328778	5.32547e-05	0.0200636	3.91988e-05	5.18357e-05	0.00217828	5.16134e-05	9.89526e-06	3.60581e-05	2.54507e-05	0.00336274	1.78109e-05	6.96568e-06	2.8244e-05	5.42017e-06	5.08466e-05	1.72659e-05	2.17041e-05	0	5.79267e-06	0.0234678	0.00325276	0.0306308	2.29898e-05	0	3.51521e-05	2.37137e-05	2.58038e-05	0.000117526	0.0285384	0.000397176	0.0485527	0.000118661	0.000755941	0.000161505	9.28347e-05	8.42472e-05	0.000116249	9.65639e-05	3.74607e-05	3.30571e-05	9.54779e-05	4.44978e-05	6.63277e-05	4.35796e-05	0.000147962	5.57942e-05
k__Bacteria;p__Firmicutes;c__Bacilli;o__Gemellales	3.56396e-06	0	0	1.06509e-05	4.78389e-06	0	4.71234e-06	3.69827e-06	0	0	3.27801e-06	3.63581e-06	1.04595e-05	5.93697e-06	1.39314e-05	0	1.08403e-05	3.6319e-05	0	1.0852e-05	5.86631e-06	5.79267e-06	1.80869e-05	3.03996e-05	1.23898e-05	0	5.30051e-06	0	0	0	5.10984e-06	0	0	1.92976e-05	1.97769e-05	1.57488e-05	0	0	0	0	3.2188e-05	0	1.1019e-05	0	0	0	2.17898e-05	0	1.85981e-05
k__Bacteria;p__Firmicutes;c__Bacilli;o__Lactobacillales	0.195754	0.166236	0.202404	0.0426144	0.0503217	0.0423425	0.229071	0.271874	0.226996	0.0586838	0.0346945	0.170036	0.0534116	0.119612	0.140386	0.0426273	0.0370469	0.0242538	0.107561	0.122726	0.154736	0.060516	0.19783	0.201311	0.188403	0.0373492	0.0349251	0.044069	0.0569507	0.104418	0.113546	0.175029	0.145836	0.191528	0.0690412	0.162181	0.0704567	0.184076	0.176119	0.167514	0.123602	0.0460891	0.0343353	0.0475122	0.0326318	0.044528	0.18408	0.175808	0.2311
k__Bacteria;p__Firmicutes;c__Bacilli;o__Turicibacterales	0.000438367	0.000577112	0.000621412	0.000356806	0.000334872	0.000246952	0.000306302	0.000321749	0.000173609	0.000415601	0.000652324	0.00071989	0.00023011	0.000504643	0.000424906	0.00295856	0.00132794	0.00217188	0.000615817	0.000944128	0.000645294	0.00124542	0.000637565	0.000725248	0.00043984	0.000170124	0.000243824	0.000169902	0.000137539	0.000402539	0.000577411	0.000630973	0.000361069	0.0007912	0.000375761	0.000503961	0.000343199	0.000603426	0.000519524	0.000639368	0.000466726	0.000349633	0.000330571	0.000381912	0.000444978	0.000442184	0.000588325	0.000710217	0.000613737
k__Bacteria;p__Firmicutes;c__Clostridia;Other	0	0	0	0	0	0	0	0	0	0	0	0	0	0	0	0	0	0	0	0	0	0	0	0	0	0	0	0	0	0	0	0	0	0	0	0	0	0	0	0	0	0	0	0	0	0	0	0	0
k__Bacteria;p__Firmicutes;c__Clostridia;o__Clostridiales	0.145438	0.160134	0.156265	0.358138	0.435764	0.349046	0.112752	0.12012	0.112053	0.366609	0.288419	0.14965	0.354484	0.139792	0.12105	0.454573	0.426063	0.642156	0.0950545	0.128342	0.100912	0.394747	0.165722	0.17779	0.14139	0.368236	0.36308	0.37345	0.317578	0.272638	0.126157	0.145636	0.14793	0.146488	0.345206	0.157866	0.371644	0.123408	0.127592	0.132727	0.260336	0.353104	0.366912	0.346764	0.348018	0.348574	0.142157	0.133462	0.134966
k__Bacteria;p__Firmicutes;c__Clostridia;o__SHA-98	0	0	0	0	0	0	0	0	0	0	0	0	0	0	0	0	0	7.2638e-06	0	0	0	0	0	4.3428e-06	0	0	0	0	0	0	0	0	0	1.92976e-05	0	1.57488e-05	0	0	0	0	0	0	0	0	0	0	0	0	0
k__Bacteria;p__Firmicutes;c__Erysipelotrichi;o__Erysipelotrichales	0.00330379	0.00411262	0.00397362	0.00459588	0.00453991	0.00401787	0.0039348	0.00220786	0.00266513	0.00589263	0.00299282	0.00523556	0.00207099	0.00192952	0.00130955	0.0012851	0.000601639	0.00323239	0.000230212	0.00045036	0.000357845	0.000637194	0.00226087	0.00243631	0.00131023	0.00129203	0.00142584	0.00186892	0.00186864	0.0020643	0.00144608	0.00332575	0.00413425	0.00347356	0.00672415	0.0090083	0.00567287	0.00507496	0.00372092	0.00319684	0.00885169	0.00245992	0.00255642	0.00236308	0.00323351	0.00320584	0.00690737	0.00692461	0.00492849
k__Bacteria;p__Fusobacteria;c__Fusobacteriia;o__Fusobacteriales	0	0	0	0	0	0	0	3.69827e-06	0	0	3.27801e-06	0	0	0	0	0	0	7.2638e-06	0	0	0	0	4.52174e-06	0	0	0	0	0	0	0	0	0	0	0	0	0	2.01882e-05	0	0	0	0	0	0	0	2.96652e-05	4.42184e-05	2.17898e-05	0	0
k__Bacteria;p__Lentisphaerae;c__[Lentisphaeria];o__Victivallales	0	0	0	0	0	0	0	0	0	0	0	0	0	5.93697e-06	0	0	0	0	0	1.62781e-05	0	0	4.52174e-06	0	0	0	0	0	0	0	0	0	0	0	0	0	0	0	0	0	0	0	1.1019e-05	0	0	0	0	0	0
k__Bacteria;p__OD1;c__ZB2;o__	0	0	0	0	0	0	0	0	0	0	0	0	0	0	0	0	0	0	0	0	0	0	0	0	3.09746e-06	0	0	0	0	0	0	0	0	0	0	0	0	0	0	0	0	0	0	0	0	0	0	0	0
k__Bacteria;p__Planctomycetes;c__Planctomycetia;o__Gemmatales	0	0	0	0	0	0	0	0	0	0	0	0	0	0	0	0	0	0	0	0	0	0	0	0	0	0	0	0	0	0	0	0	0	0	0	0	0	0	0	0	0	0	0	0	0	0	0	0	0
k__Bacteria;p__Proteobacteria;Other;Other	0	0	0	5.32547e-06	0	3.91988e-06	0	3.69827e-06	4.69213e-06	1.48429e-05	3.27801e-06	0	0	0	6.96568e-06	0	5.42017e-06	0	0	0	0	0	0	0	0	0	0	0	0	0	0	0	0	0	0	0	2.01882e-05	0	0	0	1.6094e-05	0	1.1019e-05	2.38695e-05	2.96652e-05	2.21092e-05	0	0	0
k__Bacteria;p__Proteobacteria;c__Alphaproteobacteria;o__BD7-3	0	0	0	0	0	0	0	0	0	0	0	0	0	0	0	0	0	0	0	0	0	0	9.04347e-06	0	6.19492e-06	0	0	0	0	0	0	0	0	0	0	0	0	0	0	0	0	0	0	0	0	0	0	0	0
k__Bacteria;p__Proteobacteria;c__Alphaproteobacteria;o__Caulobacterales	0	0	5.70103e-06	5.32547e-06	9.56778e-06	0	0	1.84913e-05	0	4.94763e-06	0	0	0	0	0	0	0	0	0	0	5.86631e-06	5.79267e-06	4.52174e-06	4.3428e-06	6.19492e-06	4.59795e-06	5.30051e-06	0	0	1.03215e-05	5.10984e-06	0	0	0	0	0	0	0	0	0	0	0	0	0	0	0	0	0	0
k__Bacteria;p__Proteobacteria;c__Alphaproteobacteria;o__RF32	1.06919e-05	2.24121e-05	5.70103e-06	1.59764e-05	4.78389e-06	1.17596e-05	1.4137e-05	4.80775e-05	3.7537e-05	9.89526e-06	1.96681e-05	1.45432e-05	3.13786e-05	5.34328e-05	7.66225e-05	8.4732e-05	5.96219e-05	7.99018e-05	5.17977e-05	3.25561e-05	8.79946e-05	5.2134e-05	3.61739e-05	5.64564e-05	3.40721e-05	3.21857e-05	2.12021e-05	5.85868e-05	1.89709e-05	6.70898e-05	1.02197e-05	1.31453e-05	0	0	3.95538e-05	3.14976e-05	0	4.64174e-05	2.80824e-05	1.45311e-05	1.6094e-05	0	2.20381e-05	1.19347e-05	1.48326e-05	0	0	2.95924e-05	1.85981e-05
k__Bacteria;p__Proteobacteria;c__Alphaproteobacteria;o__Rhizobiales	0	0	5.70103e-06	1.59764e-05	9.56778e-06	0	0	0.00029956	1.40764e-05	0	3.27801e-06	3.63581e-06	0	0	0	7.061e-06	0	0	0	0	1.17326e-05	0	4.52174e-05	3.03996e-05	2.78772e-05	1.37939e-05	1.0601e-05	4.10107e-05	1.42282e-05	1.54823e-05	1.53295e-05	0	0	0	0	0	0	0	0	0	0	0	0	0	0	0	0	0	0
k__Bacteria;p__Proteobacteria;c__Alphaproteobacteria;o__Rhodobacterales	0	0	0	0	0	0	0	0	0	0	0	0	0	0	0	0	0	0	0	0	0	0	0	0	0	0	0	0	0	0	5.10984e-06	0	0	0	0	0	0	0	0	0	0	0	0	0	0	0	0	0	0
k__Bacteria;p__Proteobacteria;c__Alphaproteobacteria;o__Rhodospirillales	0	0	0	0	0	7.83976e-06	0	2.21896e-05	4.69213e-06	0	0	0	0	0	0	0	0	0	0	0	0	0	0	8.68561e-06	0	0	0	0	0	0	0	0	0	0	0	0	0	0	0	0	0	0	0	0	0	0	0	0	0
k__Bacteria;p__Proteobacteria;c__Alphaproteobacteria;o__Rickettsiales	0	0	0	0	0	0	0	1.84913e-05	0	0	0	1.09074e-05	0	0	0	0	0	0	0	0	0	0	0	0	0	0	0	0	0	0	0	0	0	1.92976e-05	0	0	0	0	0	1.45311e-05	0	0	0	0	0	0	0	0	0
k__Bacteria;p__Proteobacteria;c__Alphaproteobacteria;o__Sphingomonadales	0	0	1.14021e-05	0	0	0	0	0.000247784	2.81528e-05	0	0	0	0	0	0	0	0	0	0	0	0	0	1.35652e-05	8.68561e-06	1.23898e-05	9.19591e-06	0	0	4.74273e-06	0	2.55492e-05	0	0	0	0	0	0	0	0	0	0	0	0	0	0	0	0	0	0
k__Bacteria;p__Proteobacteria;c__Betaproteobacteria;Other	0	0	2.28041e-05	2.13019e-05	4.78389e-06	2.74391e-05	0	0	0	1.97905e-05	4.58922e-05	1.09074e-05	1.04595e-05	5.93697e-06	6.96568e-06	1.4122e-05	0	1.45276e-05	1.15106e-05	0	0	0	0	0	3.09746e-06	4.59795e-06	0	5.85868e-06	0	0	0	0	3.61069e-05	0	0	0	6.05645e-05	3.09449e-05	0	0	0	0	6.61142e-05	3.58042e-05	2.96652e-05	6.63277e-05	2.17898e-05	0	0
k__Bacteria;p__Proteobacteria;c__Betaproteobacteria;o__	0	0	0	0	0	0	0	0	0	0	1.3112e-05	0	0	0	0	0	0	0	5.7553e-06	0	0	0	0	0	0	0	0	0	0	0	0	1.31453e-05	0	0	0	0	0	0	0	1.45311e-05	0	0	0	1.19347e-05	0	0	0	0	0
k__Bacteria;p__Proteobacteria;c__Betaproteobacteria;o__Burkholderiales	0.00274068	0.00159126	0.0016818	0.00340297	0.00207621	0.00776528	0.0154989	0.0163759	0.0178629	0.00273109	0.0230313	0.0013198	0.00334182	0.000819302	0.000724431	0.00174407	0.0013171	0.00156172	0.000258988	0.000293005	0.000340246	0.00146555	0.00134748	0.00168935	0.00205671	0.00236795	0.00536942	0.00868842	0.00190183	0.000299324	0.000408787	0.00201123	0.00171508	0.00123504	0.00401471	0.00135439	0.00248314	0.00128421	0.00210618	0.00139498	0.00117486	0.00452025	0.00255642	0.00379525	0.020469	0.00305107	0.00115486	0.000695421	0.00198999
k__Bacteria;p__Proteobacteria;c__Betaproteobacteria;o__Methylophilales	0	0	0	0	0	0	0	0	0	0	0	0	0	0	0	0	0	0	0	0	0	0	0	0	0	0	0	0	0	0	0	0	0	0	0	0	0	0	0	0	0	0	0	0	0	0	0	0	0
k__Bacteria;p__Proteobacteria;c__Betaproteobacteria;o__Neisseriales	0	0	0	0	0	0	0	0	0	0	0	0	0	0	0	0	0	0	0	0	0	0	0	0	6.19492e-06	0	0	0	0	0	0	0	0	0	0	0	0	0	0	0	0	0	0	0	0	0	0	0	0
k__Bacteria;p__Proteobacteria;c__Betaproteobacteria;o__Rhodocyclales	0	0	0	0	0	3.91988e-06	0	0	0	0	0	0	0	0	0	0	0	0	0	0	0	0	0	0	0	0	0	0	0	0	0	0	0	0	0	0	0	0	0	0	0	0	0	0	0	0	0	0	0
k__Bacteria;p__Proteobacteria;c__Deltaproteobacteria;o__Bdellovibrionales	0	0	0	0	0	0	0	0	0	0	0	0	0	0	0	0	0	0	0	0	0	0	0	8.68561e-06	0	0	0	0	0	0	0	0	0	0	0	0	0	0	0	0	0	0	0	0	0	0	0	0	0
k__Bacteria;p__Proteobacteria;c__Deltaproteobacteria;o__Desulfovibrionales	0.000566669	0.000459448	0.000513092	0.000244971	0.000306169	0.000509584	0.000433535	0.000691576	0.000487981	0.000425496	0.000632656	0.000628995	0.000397463	0.000397777	0.000501529	0.000840259	0.00146345	0.00140191	0.000581285	0.000515472	0.000439973	0.00115274	0.000375304	0.000651421	0.000628785	0.000285073	0.000323331	0.000322227	0.000455302	0.000402539	0.000485434	0.000525811	0.000704086	0.000578927	0.000296654	0.000629951	0.000524892	0.000355866	0.000547607	0.00066843	0.000531102	0.000511962	0.000429743	0.00047739	0.0006823	0.000420075	0.000610115	0.000562255	0.000316167
k__Bacteria;p__Proteobacteria;c__Deltaproteobacteria;o__MIZ46	0	0	0	0	0	0	0	3.69827e-06	0	0	0	0	0	0	0	0	0	0	0	0	0	0	0	0	0	0	0	0	0	0	0	0	0	0	0	0	0	0	0	0	0	0	0	0	0	0	0	0	0
k__Bacteria;p__Proteobacteria;c__Deltaproteobacteria;o__Syntrophobacterales	0	0	0	0	0	0	0	0	0	0	0	0	0	0	0	0	0	0	0	0	0	0	0	0	0	0	0	0	0	0	0	0	0	0	0	0	0	0	0	0	0	0	0	0	0	0	0	0	0
k__Bacteria;p__Proteobacteria;c__Epsilonproteobacteria;o__Campylobacterales	0	5.60303e-06	1.14021e-05	0	4.78389e-06	7.83976e-06	0	3.69827e-06	0	0	3.27801e-06	0	0	1.78109e-05	1.39314e-05	0	0	0	0	0	0	0	0	0	3.09746e-06	0	0	0	0	1.03215e-05	1.02197e-05	0	0	0	0	0	0	0	0	0	0	0	0	1.19347e-05	0	0	2.17898e-05	0	1.85981e-05
k__Bacteria;p__Proteobacteria;c__Gammaproteobacteria;Other	0	0	0	0	0	0	0	0	0	0	0	3.63581e-06	0	5.93697e-06	0	0	0	0	0	5.42602e-06	0	0	0	0	3.09746e-06	0	0	0	0	0	0	0	0	0	0	0	0	0	0	0	0	0	0	0	0	0	0	0	0
k__Bacteria;p__Proteobacteria;c__Gammaproteobacteria;o__	0	0	0	0	0	0	0	0	0	0	0	0	0	0	0	0	0	0	0	0	0	0	0	0	0	0	0	0	0	0	0	0	0	0	0	0	0	0	0	0	0	0	0	0	0	0	0	0	0
k__Bacteria;p__Proteobacteria;c__Gammaproteobacteria;o__Aeromonadales	0	0	0	0	0	0	0	3.69827e-06	0	0	0	0	0	0	0	0	0	0	5.7553e-06	0	0	0	1.80869e-05	0	0	0	0	0	0	0	0	0	0	0	0	0	0	0	0	0	0	0	0	0	0	0	0	0	0
k__Bacteria;p__Proteobacteria;c__Gammaproteobacteria;o__Alteromonadales	0	5.60303e-06	0	0	4.78389e-06	0	0	0	4.69213e-06	0	0	0	5.22977e-06	0	0	0	0	0	0	5.42602e-06	0	0	0	8.68561e-06	3.09746e-06	0	0	0	1.42282e-05	1.54823e-05	0	0	0	0	0	0	0	0	0	0	0	0	0	0	0	0	0	2.95924e-05	0
k__Bacteria;p__Proteobacteria;c__Gammaproteobacteria;o__Cardiobacteriales	0	0	0	0	0	0	0	0	0	0	0	7.27162e-06	0	0	0	0	0	7.2638e-06	0	0	0	0	0	0	0	0	0	0	0	0	0	0	0	0	0	0	0	0	0	0	0	0	0	0	0	0	0	0	0
k__Bacteria;p__Proteobacteria;c__Gammaproteobacteria;o__Chromatiales	0	0	0	0	0	0	0	0	0	0	0	0	0	0	0	0	0	0	0	0	0	0	0	0	0	0	0	0	0	0	5.10984e-06	0	0	0	0	0	0	0	0	0	0	0	0	0	0	0	0	0	0
k__Bacteria;p__Proteobacteria;c__Gammaproteobacteria;o__Enterobacteriales	0.0551522	0.0690069	0.0656473	0.134026	0.0529385	0.13199	0.0808637	0.0357474	0.0955927	0.111821	0.131491	0.166575	0.144227	0.198788	0.203468	0.239213	0.30482	0.00449629	0.301773	0.262734	0.259009	0.26023	0.0730939	0.079647	0.0690238	0.137543	0.150524	0.14509	0.23495	0.231501	0.248706	0.0651479	0.127259	0.0577383	0.136283	0.142999	0.110066	0.148087	0.120586	0.140007	0.154293	0.140153	0.164316	0.178675	0.163337	0.15461	0.156342	0.192025	0.126355
k__Bacteria;p__Proteobacteria;c__Gammaproteobacteria;o__Legionellales	0	0	0	0	0	0	0	0.00010725	9.38425e-06	0	0	0	0	0	0	0	0	0	0	0	0	0	0	0	0	0	0	0	4.74273e-06	0	0	0	0	0	0	0	0	0	0	0	0	0	0	0	0	0	0	0	0
k__Bacteria;p__Proteobacteria;c__Gammaproteobacteria;o__Oceanospirillales	0	0	0	0	0	0	0	0	0	0	0	0	0	0	0	0	0	0	0	0	0	0	0	0	0	0	0	0	0	0	0	0	0	0	0	0	0	0	0	0	0	0	0	0	0	0	0	0	0
k__Bacteria;p__Proteobacteria;c__Gammaproteobacteria;o__Pasteurellales	0.000203146	0.000218518	0.000324959	0.000266273	0.00017222	0.000337109	0.000113096	0.000247784	0.000117303	0.000168219	0.000452366	0.000239963	0.00023011	0.000219668	0.000215936	0.00119331	0.000916009	0.000464883	0.000212946	0.000211615	0.000258118	0.0012628	0.000321043	0.000364795	0.000235407	0.000160928	0.00041344	0.000187478	0.000237137	0.000190948	0.000204393	0.00024976	7.22139e-05	0.000289464	0.000177992	0.000173237	0.000141317	0.000185669	0.000280824	0.000188904	0.000209222	0.00016233	0.000352609	0.00022676	0.000563639	0.000508512	0.000152529	0.00031072	0.000204579
k__Bacteria;p__Proteobacteria;c__Gammaproteobacteria;o__Pseudomonadales	3.56396e-06	0	1.71031e-05	1.06509e-05	1.43517e-05	7.83976e-06	6.59727e-05	0.000173818	2.34606e-05	0	3.27801e-06	5.09013e-05	0	5.93697e-06	1.39314e-05	1.4122e-05	2.71009e-05	0	1.15106e-05	0	0	5.79267e-06	9.04347e-06	2.1714e-05	4.0267e-05	4.13816e-05	1.59015e-05	0	2.37137e-05	0	1.02197e-05	5.25811e-05	0	1.92976e-05	0	0	2.01882e-05	0	5.61648e-05	0	0	0	1.1019e-05	0	1.48326e-05	0	0	0	0
k__Bacteria;p__Proteobacteria;c__Gammaproteobacteria;o__Thiohalorhabdales	0	0	0	0	0	0	0	0	0	0	0	0	0	0	0	0	0	0	0	0	0	0	0	0	0	0	0	0	0	0	0	0	0	0	0	0	0	0	0	0	0	0	0	0	0	0	0	0	0
k__Bacteria;p__Proteobacteria;c__Gammaproteobacteria;o__Vibrionales	0	0	0	0	0	0	0	0	0	0	0	0	0	0	0	0	0	0	0	0	0	0	0	0	0	0	0	0	0	0	0	0	0	0	0	0	0	0	0	0	0	0	0	0	0	0	0	0	0
k__Bacteria;p__Proteobacteria;c__Gammaproteobacteria;o__Xanthomonadales	0	0	0	0	0	3.91988e-06	5.18357e-05	0.000281068	9.38425e-06	0	3.27801e-06	0	0	0	0	0	0	0	0	1.0852e-05	0	0	0	0	3.09746e-06	9.19591e-06	0	1.17174e-05	0	0	5.10984e-06	0	0.000992941	0	3.95538e-05	0.000740192	0	0	0	0.00152576	0	0	1.1019e-05	0	2.96652e-05	0	0	0	1.85981e-05
k__Bacteria;p__SAR406;c__AB16;o__Arctic96B-7	0	0	0	0	0	0	0	0	0	0	0	0	0	0	0	0	0	0	0	0	0	0	0	0	0	0	0	0	0	0	0	0	0	0	0	0	0	0	0	0	0	0	0	0	0	0	0	0	0
k__Bacteria;p__Synergistetes;c__Synergistia;o__Synergistales	0	5.60303e-06	0	0	0	0	0	0	0	0	0	0	0	0	0	0	0	0	0	0	0	0	0	0	0	0	0	0	0	0	0	0	0	0	0	0	0	0	0	0	0	0	0	0	0	0	0	0	0
k__Bacteria;p__TM7;c__TM7-1;o__	0	0	1.14021e-05	0	0	0	0	0	0	0	0	0	0	0	0	0	0	0	0	0	5.86631e-06	0	4.52174e-06	8.68561e-06	6.19492e-06	0	1.59015e-05	1.7576e-05	0	0	2.04393e-05	0	0	0	0	0	0	0	0	0	0	0	0	0	0	0	0	0	0
k__Bacteria;p__TM7;c__TM7-3;o__	3.56396e-06	1.68091e-05	5.70103e-06	1.59764e-05	0	1.56795e-05	0	2.21896e-05	0	9.89526e-06	3.27801e-06	1.8179e-05	0	1.18739e-05	1.39314e-05	1.4122e-05	1.08403e-05	4.35828e-05	5.7553e-06	1.62781e-05	5.86631e-06	1.7378e-05	9.04347e-06	1.30284e-05	9.29238e-06	4.59795e-06	5.30051e-06	0	9.48546e-06	5.16076e-06	1.02197e-05	1.31453e-05	1.80535e-05	0	0	1.57488e-05	0	0	0	0	0	0	0	0	1.48326e-05	2.21092e-05	0	0	0
k__Bacteria;p__TM7;c__TM7-3;o__CW040	0	1.68091e-05	1.71031e-05	0	0	3.91988e-06	0	0	0	0	0	0	0	0	0	1.4122e-05	0	0	5.7553e-06	0	0	0	0	8.68561e-06	0	0	0	0	0	0	5.10984e-06	0	0	0	1.97769e-05	0	0	0	0	1.45311e-05	0	0	0	0	0	0	0	0	0
k__Bacteria;p__TM7;c__TM7-3;o__I025	0	0	0	0	0	0	0	0	0	0	0	0	0	0	0	0	0	7.2638e-06	0	0	0	0	0	0	0	0	0	0	4.74273e-06	0	0	0	0	0	0	0	0	0	0	0	0	0	0	0	0	0	0	0	0
k__Bacteria;p__Tenericutes;c__Mollicutes;o__Anaeroplasmatales	7.12791e-06	0	0	0	0	0	0	0	0	0	0	0	0	0	0	0	0	0	0	0	0	0	0	0	0	0	0	0	0	0	0	0	1.80535e-05	0	0	0	0	0	1.40412e-05	0	0	0	0	0	0	0	0	0	0
k__Bacteria;p__Tenericutes;c__Mollicutes;o__RF39	3.20756e-05	5.60303e-05	4.56082e-05	1.59764e-05	3.82711e-05	3.52789e-05	3.76987e-05	3.32844e-05	4.69213e-06	2.96858e-05	4.58922e-05	5.09013e-05	5.22977e-06	5.93697e-06	1.39314e-05	2.1183e-05	2.16807e-05	5.81104e-05	0	1.0852e-05	1.75989e-05	4.63414e-05	4.52174e-06	3.47424e-05	3.09746e-06	0	3.71036e-05	0	0	5.16076e-06	5.10984e-06	0.000131453	5.41604e-05	5.78927e-05	1.97769e-05	0.000110241	0	7.73623e-05	4.21236e-05	2.90622e-05	1.6094e-05	4.99476e-05	7.71333e-05	2.38695e-05	4.44978e-05	8.84369e-05	4.35796e-05	8.87771e-05	1.85981e-05
k__Bacteria;p__Tenericutes;c__RF3;o__ML615J-28	3.56396e-06	0	5.70103e-06	0	9.56778e-06	0	0	3.69827e-06	0	0	0	0	5.22977e-06	5.93697e-06	0	7.061e-06	2.16807e-05	2.17914e-05	0	0	0	0	2.26087e-05	0	0	0	5.30051e-06	1.7576e-05	0	0	0	0	0	0	0	0	0	0	0	0	0	0	0	0	0	0	0	0	0
k__Bacteria;p__Verrucomicrobia;c__Opitutae;o__[Cerasicoccales]	0	0	0	0	0	0	0	0	0	0	0	0	0	0	0	0	0	0	0	0	0	0	0	0	0	0	0	0	0	0	0	0	0	0	0	0	0	0	0	1.45311e-05	0	0	0	0	0	0	0	0	0
k__Bacteria;p__Verrucomicrobia;c__Verrucomicrobiae;o__Verrucomicrobiales	0.00114047	0.0014792	0.00120292	0.00103314	0.000674528	0.000795735	0.00056548	0.000920868	0.000539595	0.000880678	0.000698216	0.00194879	0.000324246	0.000498706	0.000376147	0.000289501	5.96219e-05	0.00172878	4.02871e-05	0.000320135	0.000357845	0.000237499	0.00052	0.000846847	0.000334526	0.00020231	0.000238523	0.000287075	0.000123311	0.000196109	0.000250382	0.00193235	0.00166092	0.00167889	0.00124595	0.00143314	0.000868091	0.00082004	0.000800348	0.00122061	0.00123924	0.000437041	0.000749295	0.000883171	0.00096412	0.000729604	0.00318131	0.00121329	0.00130187
k__Bacteria;p__[Thermi];c__Deinococci;o__Deinococcales	0	0	0	5.32547e-06	0	0	0	0	0	0	0	0	0	0	0	0	0	0	0	0	2.34652e-05	0	1.35652e-05	4.3428e-06	0	0	0	0	4.74273e-06	0	0	0	0	0	0	0	0	0	0	0	0	0	0	0	0	0	0	0	0
[truncated: 66 more columns]

## Sheet: L5
# Constructed from biom file
#OTU ID	S1	S2	S3	S4	S5	S6	S7	S8	S9	S10	S11	S12	S13	S14	S15	S16	S17	S18	S19	S20	S21	S22	S23	S24	S25	S26	S27	S28	S29	S30	S31	S32	S33	S34	S35	S36	S37	S38	S39	S40	S41	S42	S43	S44	S45	S46	S47	S48	S49
Unassigned;Other;Other;Other;Other	0.0146158	0.0147135	0.0133974	0.0171853	0.0147487	0.0150563	0.0139768	0.0138537	0.0145972	0.0132695	0.0160655	0.0210804	0.0131215	0.0105797	0.00875586	0.00869915	0.00768038	0.00509919	0.00879985	0.00919711	0.0116857	0.00746096	0.00910225	0.0123379	0.00934504	0.00886945	0.00702848	0.00923327	0.00701924	0.0080353	0.00746547	0.0312069	0.033074	0.0329602	0.0389605	0.0265209	0.0384988	0.0307592	0.0315646	0.0284955	0.0282289	0.0269592	0.0351838	0.0356252	0.033581	0.0312403	0.0354738	0.0290597	0.0361547
k__Archaea;p__Euryarchaeota;c__Methanobacteria;o__Methanobacteriales;f__Methanobacteriaceae	4.98954e-05	7.28393e-05	7.41133e-05	5.32547e-06	0	1.17596e-05	1.4137e-05	2.58879e-05	2.81528e-05	0	9.83403e-06	3.63581e-06	5.22977e-06	0	6.96568e-06	2.8244e-05	1.62605e-05	7.2638e-05	0	5.42602e-06	0	1.7378e-05	1.80869e-05	1.73712e-05	2.16822e-05	0	1.59015e-05	5.85868e-06	0	0	0	5.25811e-05	7.22139e-05	9.64878e-05	0	0	0	1.54725e-05	0	5.81243e-05	1.6094e-05	1.24869e-05	0	3.58042e-05	0	0	0	4.43885e-05	1.85981e-05
k__Bacteria;Other;Other;Other;Other	0	1.12061e-05	0	0	0	0	0	0	0	0	0	7.27162e-06	0	0	0	0	0	0	0	0	5.86631e-06	0	0	0	0	0	0	0	0	0	0	0	0	0	0	0	0	0	0	0	0	0	0	0	0	0	0	0	0
k__Bacteria;p__Actinobacteria;Other;Other;Other	0	0	0	0	0	0	0	0	0	0	0	0	0	0	0	0	0	0	0	0	0	0	0	0	0	0	0	0	0	0	0	0	0	0	0	0	0	1.54725e-05	0	0	0	0	0	0	0	0	0	0	0
k__Bacteria;p__Actinobacteria;c__Actinobacteria;o__Actinomycetales;Other	0	0	5.70103e-06	0	0	0	0	7.39653e-06	0	0	0	0	0	0	0	0	0	0	0	0	0	0	0	0	0	0	0	0	0	0	0	0	0	0	0	0	0	0	0	0	0	0	0	0	0	0	0	0	0
k__Bacteria;p__Actinobacteria;c__Actinobacteria;o__Actinomycetales;f__Actinomycetaceae	6.41512e-05	0.000123267	6.84123e-05	8.52075e-05	4.3055e-05	0.000109757	4.71234e-05	3.69827e-05	4.22291e-05	8.41097e-05	0.000104896	7.6352e-05	0.000135974	9.49916e-05	0.000146279	0.000458965	0.000243908	0.000835337	0.000132372	0.000211615	0.00015839	0.00026067	9.94782e-05	0.000212797	7.12416e-05	0.000128743	0.000153715	7.61628e-05	6.16555e-05	0.000123858	0.000178844	0.000197179	9.02674e-05	5.78927e-05	5.93307e-05	0.000141739	4.03763e-05	9.28347e-05	0.00011233	0.000174373	0.000144846	0.00016233	0.000132228	0.000214825	0.000148326	0.000132655	0.000174319	0.000177554	7.43923e-05
k__Bacteria;p__Actinobacteria;c__Actinobacteria;o__Actinomycetales;f__Brevibacteriaceae	0	0	0	0	0	0	0	0	0	0	0	0	0	0	0	0	0	1.45276e-05	0	0	0	0	0	0	0	0	0	0	0	0	0	0	0	0	0	0	0	0	0	0	0	0	0	0	0	0	0	0	1.85981e-05
k__Bacteria;p__Actinobacteria;c__Actinobacteria;o__Actinomycetales;f__Cellulomonadaceae	0	0	0	0	0	0	0	1.10948e-05	9.38425e-06	0	0	0	0	0	0	0	0	0	0	0	0	0	0	0	0	0	0	0	0	0	0	0	0	0	0	0	0	0	0	0	0	0	0	0	0	0	0	0	0
k__Bacteria;p__Actinobacteria;c__Actinobacteria;o__Actinomycetales;f__Corynebacteriaceae	2.49477e-05	0	0	1.06509e-05	0	0	0	3.69827e-06	4.69213e-06	9.89526e-06	3.27801e-06	3.63581e-06	0	0	0	7.061e-06	5.42017e-06	2.17914e-05	0	0	5.86631e-06	1.7378e-05	1.35652e-05	0	3.09746e-06	4.59795e-06	0	5.85868e-06	9.48546e-06	0	5.10984e-06	0	0	0	0	0	0	0	0	1.45311e-05	0	2.49738e-05	0	4.7739e-05	1.48326e-05	0	0	2.95924e-05	0
k__Bacteria;p__Actinobacteria;c__Actinobacteria;o__Actinomycetales;f__Dermacoccaceae	0	0	0	0	0	0	0	0	0	0	0	0	0	0	0	0	0	0	0	0	0	0	0	0	0	0	0	0	0	0	0	0	0	0	0	0	0	0	0	0	0	0	0	0	0	0	0	0	0
k__Bacteria;p__Actinobacteria;c__Actinobacteria;o__Actinomycetales;f__Frankiaceae	0	0	0	0	0	0	0	3.69827e-06	0	0	0	0	0	0	0	0	0	0	0	0	0	0	0	0	0	0	0	0	0	0	0	0	0	0	0	0	0	0	0	0	0	0	0	0	0	0	0	0	0
k__Bacteria;p__Actinobacteria;c__Actinobacteria;o__Actinomycetales;f__Geodermatophilaceae	0	0	0	0	0	0	0	3.69827e-06	0	0	0	0	0	0	0	0	0	0	0	0	0	0	0	0	0	0	0	0	0	0	0	0	0	0	0	0	0	0	0	0	0	0	0	0	0	0	0	0	0
k__Bacteria;p__Actinobacteria;c__Actinobacteria;o__Actinomycetales;f__Intrasporangiaceae	0	0	0	0	0	0	0	0	0	0	0	0	0	0	0	0	0	0	0	0	0	0	0	0	0	0	0	0	0	0	0	0	0	0	0	0	0	0	0	0	0	0	0	0	0	0	0	0	0
k__Bacteria;p__Actinobacteria;c__Actinobacteria;o__Actinomycetales;f__Kineosporiaceae	0	0	0	0	0	0	0	1.10948e-05	0	0	0	0	0	0	0	0	0	0	0	0	0	0	0	0	0	0	0	0	0	0	0	0	0	0	0	0	0	0	0	0	0	0	0	0	0	0	0	0	0
k__Bacteria;p__Actinobacteria;c__Actinobacteria;o__Actinomycetales;f__Microbacteriaceae	0	0	0	0	0	0	0	6.65688e-05	0	0	0	0	0	0	0	0	0	0	0	0	0	0	0	0	0	0	0	0	0	0	5.10984e-06	0	0	0	0	0	0	0	0	0	0	0	0	0	0	0	0	0	0
k__Bacteria;p__Actinobacteria;c__Actinobacteria;o__Actinomycetales;f__Micrococcaceae	2.13837e-05	1.68091e-05	0	0	9.56778e-06	1.17596e-05	0	1.84913e-05	9.38425e-06	4.94763e-06	1.3112e-05	0	0	5.93697e-06	0	1.4122e-05	5.42017e-06	0.000123485	0	1.0852e-05	1.75989e-05	1.7378e-05	1.80869e-05	1.30284e-05	1.23898e-05	9.19591e-06	5.30051e-06	1.17174e-05	9.48546e-06	3.09645e-05	0	2.62905e-05	1.80535e-05	3.85951e-05	3.95538e-05	0	0	0	0	1.45311e-05	0	0	0	0	1.48326e-05	0	0	0	0
k__Bacteria;p__Actinobacteria;c__Actinobacteria;o__Actinomycetales;f__Nocardiaceae	0	0	0	0	0	0	0	1.10948e-05	0	0	0	0	0	0	0	0	0	0	0	0	0	0	0	0	0	0	0	0	0	0	0	0	0	0	0	0	0	0	0	0	0	0	0	0	0	0	0	0	0
k__Bacteria;p__Actinobacteria;c__Actinobacteria;o__Actinomycetales;f__Nocardioidaceae	0	0	5.70103e-06	0	0	0	0	1.84913e-05	0	0	0	0	0	0	0	0	0	0	0	0	5.86631e-06	0	0	0	0	9.19591e-06	0	0	0	0	0	0	0	0	0	0	0	0	0	0	0	0	0	0	0	0	0	0	0
k__Bacteria;p__Actinobacteria;c__Actinobacteria;o__Actinomycetales;f__Propionibacteriaceae	0	0	0	0	0	0	0	0	0	0	0	0	0	0	0	0	0	0	0	0	0	0	0	0	0	0	0	0	0	0	0	0	0	0	0	0	0	0	0	0	0	0	0	0	0	0	0	0	0
k__Bacteria;p__Actinobacteria;c__Actinobacteria;o__Actinomycetales;f__Pseudonocardiaceae	0	0	0	0	0	0	0	1.10948e-05	0	0	0	0	0	0	0	0	0	0	0	0	0	0	0	0	0	0	0	0	0	0	0	0	0	0	0	0	0	0	0	0	0	0	0	0	0	0	0	0	0
k__Bacteria;p__Actinobacteria;c__Actinobacteria;o__Actinomycetales;f__Sporichthyaceae	0	0	0	0	0	0	0	3.69827e-06	0	0	0	0	0	0	0	0	0	0	0	0	0	0	0	0	0	0	0	0	0	1.03215e-05	0	0	0	0	0	0	0	0	0	0	0	0	0	0	0	0	0	0	0
k__Bacteria;p__Actinobacteria;c__Actinobacteria;o__Actinomycetales;f__Streptomycetaceae	0	0	0	0	0	0	0	6.65688e-05	2.81528e-05	0	0	0	0	0	0	0	0	0	0	0	0	0	0	0	3.09746e-06	0	0	0	0	5.16076e-06	5.10984e-06	0	0	0	0	0	0	0	0	0	0	0	0	0	0	0	0	0	0
k__Bacteria;p__Actinobacteria;c__Actinobacteria;o__Actinomycetales;f__Williamsiaceae	0	0	0	0	0	0	0	2.95861e-05	0	0	0	0	0	0	0	0	0	0	0	0	0	0	0	0	0	0	0	0	0	5.16076e-06	0	0	0	0	0	0	0	0	0	0	0	0	0	0	0	0	0	0	0
k__Bacteria;p__Actinobacteria;c__Actinobacteria;o__Bifidobacteriales;f__Bifidobacteriaceae	0.264228	0.253307	0.248086	0.0800737	0.0995527	0.0736545	0.231253	0.253997	0.213393	0.108408	0.0474951	0.161746	0.125389	0.247364	0.245143	0.0392874	0.0312364	0.0686865	0.28213	0.256396	0.206564	0.0326127	0.286158	0.252547	0.314566	0.120043	0.105268	0.109223	0.140148	0.187846	0.256825	0.268768	0.214295	0.268873	0.100961	0.18741	0.114346	0.192075	0.217877	0.204699	0.170355	0.0808776	0.0682409	0.070773	0.0489773	0.0602034	0.163119	0.178901	0.18414
k__Bacteria;p__Actinobacteria;c__Coriobacteriia;o__Coriobacteriales;f__Coriobacteriaceae	0.0569627	0.0503992	0.050779	0.0512949	0.0499007	0.0450825	0.0519535	0.0474451	0.0453447	0.0328869	0.0339405	0.0522102	0.0662769	0.0481845	0.0609288	0.0216702	0.0190302	0.0435102	0.0118904	0.0148293	0.0127768	0.0176329	0.040456	0.0516099	0.0543697	0.0627529	0.0593074	0.0436296	0.0503963	0.0644063	0.0662848	0.0557491	0.0608763	0.0540139	0.0495412	0.0840985	0.054185	0.0503783	0.0611073	0.0589381	0.0701537	0.0574771	0.0466326	0.0430128	0.051662	0.0547866	0.0550629	0.0638455	0.056315
k__Bacteria;p__Actinobacteria;c__OPB41;o__;f__	0	0	0	0	0	0	0	0	0	0	0	0	0	0	0	0	0	0	0	0	0	0	0	0	0	4.59795e-06	0	0	0	0	0	0	0	0	0	0	0	0	0	0	0	0	0	0	0	0	0	0	0
k__Bacteria;p__Actinobacteria;c__Thermoleophilia;o__Solirubrobacterales;f__	0	0	0	0	0	0	0	0	0	4.94763e-06	0	0	0	0	0	0	0	0	0	0	0	0	0	0	0	0	0	0	0	0	0	0	0	0	0	0	0	0	0	0	0	0	0	0	0	0	0	0	0
k__Bacteria;p__Actinobacteria;c__Thermoleophilia;o__Solirubrobacterales;f__Patulibacteraceae	0	0	0	0	0	0	0	1.47931e-05	0	0	0	0	0	0	0	0	0	0	0	0	0	0	0	0	0	0	0	0	0	5.16076e-06	0	0	0	0	0	0	0	0	0	0	0	0	0	0	0	0	0	0	0
k__Bacteria;p__Bacteroidetes;c__Bacteroidia;o__Bacteroidales;Other	3.56396e-06	0	5.70103e-06	0	4.78389e-06	3.91988e-06	0	0	4.69213e-06	0	1.3112e-05	2.18149e-05	0	0	0	0	0	7.2638e-06	0	0	0	0	0	4.3428e-06	3.09746e-06	0	0	0	0	5.16076e-06	0	0	0	0	3.95538e-05	0	0	1.54725e-05	0	1.45311e-05	0	1.24869e-05	3.30571e-05	3.58042e-05	0	2.21092e-05	0	1.47962e-05	1.85981e-05
k__Bacteria;p__Bacteroidetes;c__Bacteroidia;o__Bacteroidales;f__	0	2.24121e-05	0	5.32547e-06	0	0	0	7.39653e-06	0	0	0	1.8179e-05	0	5.93697e-06	0	7.061e-06	0	1.45276e-05	0	0	0	0	0	1.30284e-05	3.09746e-06	0	0	0	0	0	0	0	0	1.92976e-05	0	3.14976e-05	0	0	0	1.45311e-05	0	0	0	0	2.96652e-05	0	0	0	0
k__Bacteria;p__Bacteroidetes;c__Bacteroidia;o__Bacteroidales;f__Bacteroidaceae	0.189788	0.195546	0.183898	0.203454	0.157768	0.193505	0.226644	0.19285	0.235784	0.17624	0.221184	0.237189	0.179292	0.20457	0.189432	0.140168	0.124957	0.156324	0.175709	0.179395	0.226756	0.166232	0.166323	0.182506	0.159779	0.176952	0.15787	0.146356	0.153285	0.10258	0.158201	0.185033	0.225686	0.156156	0.152065	0.193001	0.129749	0.231097	0.224884	0.224156	0.13593	0.196956	0.176911	0.189703	0.194367	0.206058	0.215632	0.188903	0.190314
k__Bacteria;p__Bacteroidetes;c__Bacteroidia;o__Bacteroidales;f__Porphyromonadaceae	0.0158311	0.0175823	0.0204211	0.0264889	0.0204942	0.0244953	0.0156261	0.0163352	0.0185011	0.0188307	0.0303675	0.0205132	0.0178074	0.018464	0.0193785	0.0373456	0.0347541	0.0133654	0.010607	0.0180687	0.0193353	0.0455825	0.0157447	0.017267	0.0138302	0.0178125	0.0196702	0.0138323	0.0166612	0.0131806	0.0141031	0.0191658	0.01892	0.0201081	0.0191638	0.0227885	0.0176041	0.0194643	0.0208793	0.023395	0.0147099	0.0205784	0.0185671	0.0246214	0.0297394	0.0291842	0.0215937	0.0204039	0.0170916
k__Bacteria;p__Bacteroidetes;c__Bacteroidia;o__Bacteroidales;f__Prevotellaceae	0.0084644	0.00765373	0.00821518	0.0661423	0.0819528	0.0976912	0.00754916	0.012012	0.00526926	0.0942276	0.155519	0.00134888	0.02515	0.00107459	0.000877676	0.00098854	0.000422773	0.00504834	0.000546753	0.00050462	0.000357845	0.000417072	0.00770504	0.00546325	0.00587588	0.0559111	0.0866104	0.0940025	0.00953289	0.00413377	0.000495654	0.00768998	0.0057049	0.00704361	0.0670437	0.00171662	0.0730004	0.00434776	0.00332776	0.00302247	0.0193128	0.059088	0.0727257	0.044982	0.0588855	0.0541676	0.00346458	0.000902567	0.00496569
k__Bacteria;p__Bacteroidetes;c__Bacteroidia;o__Bacteroidales;f__RF16	0	0	0	5.32547e-06	0	0	0	0	0	0	9.83403e-06	0	0	0	0	0	0	0	0	0	0	0	0	0	0	0	0	0	0	0	0	0	0	0	0	0	0	0	0	0	0	0	0	0	0	0	0	0	0
k__Bacteria;p__Bacteroidetes;c__Bacteroidia;o__Bacteroidales;f__Rikenellaceae	0.00443713	0.00528365	0.00452091	0.00474499	0.00312866	0.00528792	0.00393951	0.00423082	0.00384285	0.00401748	0.00523498	0.00593	0.00358239	0.00393621	0.00376843	0.00288795	0.00350685	0.00896353	0.00235967	0.00289207	0.00293902	0.00428657	0.00415095	0.00489	0.00308197	0.00390826	0.00246474	0.00285318	0.00270336	0.00371575	0.00281041	0.00414076	0.00557852	0.00441914	0.0038565	0.00422067	0.00480478	0.00394548	0.00329968	0.00354558	0.0040074	0.00293442	0.00352609	0.00341334	0.00489476	0.00342693	0.00647158	0.0034919	0.00466812
k__Bacteria;p__Bacteroidetes;c__Bacteroidia;o__Bacteroidales;f__S24-7	0.000131866	0.000168091	0.000148227	9.58584e-05	0.000129165	8.23174e-05	5.6548e-05	0.000403111	0.000112611	5.44239e-05	8.52283e-05	8.36236e-05	8.36763e-05	0.00033247	0.000334353	0.000176525	0.000238488	0.00057384	0.000155393	0.000282153	0.000240519	0.000283841	0.000352695	0.000204112	0.000291161	0.000317259	0.000233223	0.000140608	0.000180224	0.00020127	0.000275931	0.000144598	0.000144428	0.000115785	7.91077e-05	0.000110241	0.000100941	1.54725e-05	0.00011233	5.81243e-05	4.8282e-05	4.99476e-05	5.50952e-05	2.38695e-05	0.000133494	0.000110546	8.71593e-05	7.39809e-05	0.000130187
k__Bacteria;p__Bacteroidetes;c__Bacteroidia;o__Bacteroidales;f__[Barnesiellaceae]	0.00146835	0.00187141	0.00150507	0.00128344	0.00110029	0.00208537	0.00164461	0.001912	0.00201292	0.000920259	0.00167179	0.000963489	0.00128652	0.00119927	0.00132348	0.000586063	0.000807606	0.00265129	0.00068488	0.000775921	0.000797818	0.000903656	0.00116209	0.00149392	0.00108411	0.00110351	0.00109721	0.00108971	0.000958032	0.000578005	0.000700048	0.00120936	0.00167897	0.00104207	0.000870184	0.000818936	0.000908467	0.00126874	0.001362	0.00122061	0.000965639	0.00169822	0.00117904	0.00126508	0.00158709	0.00110546	0.00145992	0.00127247	0.00156224
k__Bacteria;p__Bacteroidetes;c__Bacteroidia;o__Bacteroidales;f__[Odoribacteraceae]	0.00254823	0.00275669	0.00282201	0.00183729	0.00177961	0.00238721	0.0024457	0.00286246	0.00292319	0.00158324	0.00228477	0.00208695	0.00172582	0.000985538	0.000668705	0.00233719	0.00284559	0.00393698	0.000316541	0.000520898	0.000868213	0.00239816	0.00248695	0.00210626	0.00201335	0.00168285	0.00112901	0.00123618	0.00149396	0.00104763	0.000373018	0.00285252	0.00227474	0.00218063	0.00142394	0.000818936	0.00165543	0.0021352	0.00259762	0.00260106	0.00180253	0.00179811	0.00152063	0.00173054	0.00173542	0.00156975	0.00198287	0.000665828	0.00204579
k__Bacteria;p__Bacteroidetes;c__Bacteroidia;o__Bacteroidales;f__[Paraprevotellaceae]	0.000734175	0.000627539	0.000353464	0.00242841	0.00209056	0.00331622	0.00107912	0.001483	0.00136541	0.00169704	0.00271092	5.45371e-05	0.00395371	0.000480895	0.00061298	0.000402477	0.000411933	0.00893447	0.000224457	0.000244171	0.000258118	0.000237499	0.000384348	0.000330053	0.0009757	0.00273578	0.00246474	0.00396047	0.00320609	0.00181143	0.000235052	0.000486375	0.000379123	0.000347356	0.00227435	0.000488212	0.00262446	0.000232087	0.000365071	0.000276091	0.00342802	0.00348384	0.0024903	0.00321045	0.00363399	0.00159186	0.000130739	0.000207147	0.000539344
k__Bacteria;p__Bacteroidetes;c__Cytophagia;o__Cytophagales;f__Cytophagaceae	0	0	0	0	0	0	0	2.58879e-05	0	0	0	0	0	0	0	0	0	0	0	0	0	0	0	0	0	0	0	0	0	0	0	0	0	0	0	0	0	0	0	0	0	0	0	0	0	0	0	0	0
k__Bacteria;p__Bacteroidetes;c__Flavobacteriia;o__Flavobacteriales;f__Flavobacteriaceae	0	0	0	0	0	0	0	0	0	0	0	0	0	0	0	0	0	0	0	0	0	0	4.52174e-06	0	3.09746e-06	0	0	0	9.48546e-06	0	0	0	0	1.92976e-05	0	0	0	0	0	0	1.6094e-05	1.24869e-05	0	0	0	0	0	0	0
k__Bacteria;p__Bacteroidetes;c__Flavobacteriia;o__Flavobacteriales;f__[Weeksellaceae]	0	0	0	0	0	0	0	3.69827e-06	0	0	0	0	0	0	0	0	0	0	0	0	0	0	0	0	0	0	0	0	0	0	0	0	0	0	0	0	0	0	0	0	0	0	0	0	0	0	0	0	0
k__Bacteria;p__Bacteroidetes;c__Sphingobacteriia;o__Sphingobacteriales;f__	0	0	0	0	0	0	0	3.69827e-06	0	0	0	0	0	0	0	0	0	0	0	0	0	0	0	0	0	0	0	0	0	0	0	0	0	0	0	0	0	0	0	0	0	0	0	0	0	0	0	0	0
k__Bacteria;p__Bacteroidetes;c__Sphingobacteriia;o__Sphingobacteriales;f__Sphingobacteriaceae	0	0	0	0	0	0	0	2.95861e-05	0	0	0	0	0	0	0	0	0	0	0	0	0	0	0	0	3.09746e-06	0	0	0	0	0	0	0	1.80535e-05	0	0	0	0	0	0	0	0	0	0	0	0	0	0	0	0
k__Bacteria;p__Bacteroidetes;c__[Saprospirae];o__[Saprospirales];f__Chitinophagaceae	0	0	0	0	0	0	0	0	0	0	0	0	0	0	0	0	0	0	0	0	0	0	0	4.3428e-06	3.09746e-06	0	0	1.17174e-05	0	0	0	0	0	0	0	0	0	0	0	0	0	0	0	0	0	0	0	0	0
k__Bacteria;p__Bacteroidetes;c__[Saprospirae];o__[Saprospirales];f__Saprospiraceae	0	0	0	0	0	0	0	0	0	0	0	0	0	0	0	0	0	0	0	0	0	0	0	0	0	0	0	0	0	0	0	0	0	0	0	0	0	0	0	0	0	0	0	0	0	0	0	0	0
k__Bacteria;p__Cyanobacteria;c__4C0d-2;o__YS2;f__	0	0	0	0	0	0	0	3.69827e-05	0	0	0	3.63581e-06	4.18382e-05	1.78109e-05	0	7.061e-06	5.96219e-05	0	0	0	5.86631e-06	5.79267e-06	2.71304e-05	0	2.16822e-05	0	1.59015e-05	5.85868e-06	0	1.03215e-05	0	0	0	0	0	0	0	0	0	0	0	0	0	0	0	0	0	0	1.85981e-05
k__Bacteria;p__Cyanobacteria;c__Chloroplast;o__Cryptophyta;f__	0	0	0	0	0	0	0	0	0	0	0	0	0	0	0	0	0	0	0	0	0	0	0	0	0	0	0	0	0	0	0	0	0	0	0	0	0	0	0	0	0	0	0	0	0	0	0	0	0
k__Bacteria;p__Cyanobacteria;c__Chloroplast;o__Stramenopiles;f__	0	0	0	0	0	0	0	0	0	0	0	0	0	0	0	0	0	0	0	0	0	0	0	0	0	0	0	0	0	0	0	0	0	0	0	0	0	0	0	0	0	0	0	0	0	0	0	0	0
k__Bacteria;p__Cyanobacteria;c__Chloroplast;o__Streptophyta;f__	3.56396e-06	5.60303e-06	1.71031e-05	0	0	0	0	0.000181215	4.22291e-05	3.46334e-05	3.60581e-05	0.000101803	0	0	0	0	0	1.45276e-05	0	0	0	0	0	1.30284e-05	3.09746e-06	4.59795e-06	0	5.85868e-06	0	0	0	1.31453e-05	0	0	0	0	0	0	0	0	0	0	0	0	0	0	0	0	0
k__Bacteria;p__Firmicutes;Other;Other;Other	0	5.60303e-06	0	5.32547e-06	0	0	4.71234e-06	0	4.69213e-06	0	0	0	0	0	0	0	0	0	0	0	0	0	0	0	0	0	0	0	0	0	0	1.31453e-05	0	0	0	0	0	0	1.40412e-05	0	0	0	1.1019e-05	0	0	0	0	0	0
k__Bacteria;p__Firmicutes;c__Bacilli;Other;Other	0	0	0	0	0	0	0	0	0	0	0	3.63581e-06	0	0	0	0	0	0	0	0	0	0	0	0	0	0	0	0	0	0	0	0	0	1.92976e-05	0	0	0	0	0	0	0	0	0	1.19347e-05	0	2.21092e-05	0	0	0
k__Bacteria;p__Firmicutes;c__Bacilli;o__Bacillales;Other	0.000292244	0.000313769	0.000296453	2.13019e-05	5.74067e-05	1.56795e-05	1.88493e-05	4.43792e-05	1.40764e-05	0	3.27801e-06	1.09074e-05	1.56893e-05	0	0	0	0	0	5.7553e-06	0	0	0	9.04347e-05	2.1714e-05	0.000123898	1.37939e-05	0	5.85868e-06	0	5.16076e-06	1.02197e-05	0.000420649	3.61069e-05	0.000906986	1.97769e-05	4.72463e-05	4.03763e-05	0	1.40412e-05	0	3.2188e-05	1.24869e-05	0	4.7739e-05	0	0	2.17898e-05	7.39809e-05	3.71962e-05
k__Bacteria;p__Firmicutes;c__Bacilli;o__Bacillales;f__	0	0	5.70103e-06	0	0	0	0	0	0	0	0	0	0	0	0	0	0	0	0	0	0	0	0	0	0	0	0	0	0	0	0	2.62905e-05	0	0	0	3.14976e-05	0	0	0	0	0	0	0	1.19347e-05	0	0	0	0	0
k__Bacteria;p__Firmicutes;c__Bacilli;o__Bacillales;f__Bacillaceae	0.0355148	0.0455414	0.0325529	3.19528e-05	0.0200062	2.35193e-05	3.29863e-05	0.0021339	3.7537e-05	9.89526e-06	2.62241e-05	1.45432e-05	0.00334705	1.78109e-05	6.96568e-06	2.8244e-05	5.42017e-06	2.17914e-05	1.15106e-05	2.17041e-05	0	5.79267e-06	0.0233683	0.0032267	0.0305007	9.19591e-06	0	1.7576e-05	2.37137e-05	2.0643e-05	0.000107307	0.0280651	0.000361069	0.0474527	9.88846e-05	0.000677197	0.000121129	9.28347e-05	7.0206e-05	0.000116249	6.4376e-05	2.49738e-05	2.20381e-05	3.58042e-05	4.44978e-05	6.63277e-05	2.17898e-05	7.39809e-05	1.85981e-05
k__Bacteria;p__Firmicutes;c__Bacilli;o__Bacillales;f__Paenibacillaceae	0	0	0	0	0	0	0	0	0	0	6.55602e-06	0	0	0	0	0	0	0	0	0	0	0	0	4.3428e-06	3.09746e-06	0	0	5.85868e-06	0	0	0	0	0	0	0	0	0	0	0	0	0	0	1.1019e-05	0	0	0	0	0	0
k__Bacteria;p__Firmicutes;c__Bacilli;o__Bacillales;f__Planococcaceae	1.06919e-05	3.36182e-05	2.28041e-05	0	0	0	0	0	0	0	0	0	0	0	0	0	0	0	0	0	0	0	9.04347e-06	0	3.09746e-06	0	0	0	0	0	0	1.31453e-05	0	0.000154381	0	0	0	0	0	0	0	0	0	0	0	0	0	0	0
k__Bacteria;p__Firmicutes;c__Bacilli;o__Bacillales;f__Staphylococcaceae	3.56396e-06	0	0	0	0	0	0	0	0	0	0	0	0	0	0	0	0	2.90552e-05	0	0	0	0	0	0	0	0	0	5.85868e-06	0	0	0	1.31453e-05	0	3.85951e-05	0	0	0	0	0	0	0	0	0	0	0	0	0	0	0
k__Bacteria;p__Firmicutes;c__Bacilli;o__Gemellales;f__Gemellaceae	3.56396e-06	0	0	1.06509e-05	4.78389e-06	0	4.71234e-06	3.69827e-06	0	0	3.27801e-06	3.63581e-06	1.04595e-05	5.93697e-06	1.39314e-05	0	1.08403e-05	3.6319e-05	0	1.0852e-05	5.86631e-06	5.79267e-06	1.80869e-05	3.03996e-05	1.23898e-05	0	5.30051e-06	0	0	0	5.10984e-06	0	0	1.92976e-05	1.97769e-05	1.57488e-05	0	0	0	0	3.2188e-05	0	1.1019e-05	0	0	0	2.17898e-05	0	1.85981e-05
k__Bacteria;p__Firmicutes;c__Bacilli;o__Lactobacillales;Other	1.06919e-05	3.92212e-05	1.14021e-05	1.59764e-05	0	7.83976e-06	0	3.69827e-06	9.38425e-06	9.89526e-06	1.63901e-05	0	5.22977e-06	0	0	2.8244e-05	4.33614e-05	0	5.7553e-06	0	0	4.05487e-05	4.52174e-06	4.3428e-06	6.19492e-06	4.59795e-06	1.0601e-05	0	1.89709e-05	0	5.10984e-06	1.31453e-05	0	7.71903e-05	3.95538e-05	0	2.01882e-05	0	2.80824e-05	1.45311e-05	0	0	5.50952e-05	3.58042e-05	4.44978e-05	2.21092e-05	2.17898e-05	0	0
k__Bacteria;p__Firmicutes;c__Bacilli;o__Lactobacillales;f__	5.70233e-05	5.60303e-05	9.12164e-05	9.05329e-05	5.26228e-05	0.000129356	0.000108384	7.39653e-05	7.5074e-05	0.000118743	0.000167179	0.000152704	5.75275e-05	4.74958e-05	7.66225e-05	0.000289501	0.000135504	0.000188859	8.63294e-05	5.42602e-05	5.27968e-05	0.000266463	4.52174e-05	9.98845e-05	4.33645e-05	5.51755e-05	6.89067e-05	0.000105456	0.000109083	0.000113537	0.000107307	0.000170888	3.61069e-05	0.000115785	0.000217546	0.000204734	0.000141317	0.000154725	5.61648e-05	0.000116249	0.000273598	0.000174816	0.000297514	0.000190956	0.000296652	0.000132655	0.000152529	0.000221943	0.000278971
k__Bacteria;p__Firmicutes;c__Bacilli;o__Lactobacillales;f__Aerococcaceae	7.12791e-06	0	0	0	0	0	0	0	0	0	0	0	0	0	0	0	0	7.2638e-06	0	0	0	0	0	0	6.19492e-06	0	0	0	0	0	0	0	0	0	0	0	0	0	0	0	0	0	0	0	0	0	0	0	0
k__Bacteria;p__Firmicutes;c__Bacilli;o__Lactobacillales;f__Carnobacteriaceae	0	5.60303e-06	2.28041e-05	2.13019e-05	9.56778e-06	7.83976e-06	0	0	0	0	6.55602e-06	0	0	0	0	4.2366e-05	0	7.99018e-05	0	0	1.17326e-05	5.79267e-06	9.04347e-06	0	3.09746e-06	4.59795e-06	1.0601e-05	5.85868e-06	0	1.03215e-05	0	2.62905e-05	0	0	0	0	0	0	0	1.45311e-05	1.6094e-05	0	1.1019e-05	2.38695e-05	0	2.21092e-05	0	1.47962e-05	0
k__Bacteria;p__Firmicutes;c__Bacilli;o__Lactobacillales;f__Enterococcaceae	0.00246982	0.00265023	0.00293033	0.0105497	0.00330088	0.00887068	0.00253524	0.00098004	0.0023836	0.00664467	0.0110108	0.00280321	0.00737398	0.00143675	0.0020897	0.0240215	0.0248298	0.000108957	0.00161724	0.00202391	0.0033262	0.0424776	0.00282608	0.00278374	0.00210937	0.00681417	0.00811508	0.00860054	0.0139152	0.0102802	0.00426671	0.00212953	0.0028344	0.00221922	0.00832608	0.00573255	0.00492591	0.00278504	0.00404386	0.0021506	0.00708136	0.0113756	0.00849568	0.0143336	0.0135273	0.0144152	0.0019175	0.0050307	0.00332906
k__Bacteria;p__Firmicutes;c__Bacilli;o__Lactobacillales;f__Lactobacillaceae	0.188865	0.157815	0.192432	0.0236877	0.043586	0.0242327	0.22172	0.268646	0.219174	0.044212	0.0160885	0.150668	0.0387787	0.105239	0.123543	0.00204769	0.00166399	0.00617423	0.0987033	0.112737	0.140557	0.00226493	0.189018	0.192638	0.182025	0.0258911	0.018997	0.0287368	0.0340006	0.0812097	0.0948743	0.168167	0.134426	0.181976	0.05053	0.144857	0.0586264	0.16718	0.160968	0.149263	0.0990746	0.0232256	0.0157572	0.0204442	0.00956704	0.0164935	0.163968	0.149782	0.217151
k__Bacteria;p__Firmicutes;c__Bacilli;o__Lactobacillales;f__Leuconostocaceae	0	0	0	0	0	0	0	0	0	0	0	0	0	0	0	0	0	7.2638e-06	0	0	0	0	0	0	0	0	0	0	0	0	5.10984e-06	0	0	0	0	0	2.01882e-05	0	0	0	0	0	0	0	0	0	0	0	0
k__Bacteria;p__Firmicutes;c__Bacilli;o__Lactobacillales;f__Streptococcaceae	0.00434446	0.00567026	0.00691535	0.00824915	0.00337264	0.00909412	0.00470762	0.00217088	0.00535372	0.00769851	0.00740503	0.016412	0.00719616	0.0128892	0.0146767	0.0161979	0.0103742	0.0176874	0.00714808	0.00791114	0.0107881	0.0154606	0.005928	0.00578461	0.00420945	0.00457956	0.00772285	0.00662031	0.00890685	0.0128038	0.0142871	0.00452197	0.00853929	0.0071401	0.00992801	0.0113864	0.00672266	0.0139562	0.0110223	0.0159551	0.0171562	0.0113131	0.00971879	0.0124837	0.00919622	0.0134424	0.0180202	0.020759	0.0103405
k__Bacteria;p__Firmicutes;c__Bacilli;o__Turicibacterales;f__Turicibacteraceae	0.000438367	0.000577112	0.000621412	0.000356806	0.000334872	0.000246952	0.000306302	0.000321749	0.000173609	0.000415601	0.000652324	0.00071989	0.00023011	0.000504643	0.000424906	0.00295856	0.00132794	0.00217188	0.000615817	0.000944128	0.000645294	0.00124542	0.000637565	0.000725248	0.00043984	0.000170124	0.000243824	0.000169902	0.000137539	0.000402539	0.000577411	0.000630973	0.000361069	0.0007912	0.000375761	0.000503961	0.000343199	0.000603426	0.000519524	0.000639368	0.000466726	0.000349633	0.000330571	0.000381912	0.000444978	0.000442184	0.000588325	0.000710217	0.000613737
k__Bacteria;p__Firmicutes;c__Clostridia;Other;Other	0	0	0	0	0	0	0	0	0	0	0	0	0	0	0	0	0	0	0	0	0	0	0	0	0	0	0	0	0	0	0	0	0	0	0	0	0	0	0	0	0	0	0	0	0	0	0	0	0
k__Bacteria;p__Firmicutes;c__Clostridia;o__Clostridiales;Other	0.000388471	0.000274548	0.000307855	0.00063373	0.00104289	0.000529183	0.000268603	0.000199706	0.000347217	0.00108353	0.000468756	0.000454476	0.000800155	0.000267164	0.000139314	0.000508392	0.000357731	0.001184	0.000299275	0.000249597	0.000275716	0.000167987	0.000334608	0.000338739	0.000291161	0.000441404	0.000349834	0.000462835	0.0005217	0.000237395	0.000194174	0.000617828	0.000505497	0.000675415	0.00114706	0.000787439	0.00195825	0.000603426	0.000379112	0.000377808	0.000675948	0.000998951	0.00104681	0.00124121	0.00100862	0.000707495	0.000762644	0.000547459	0.000539344
k__Bacteria;p__Firmicutes;c__Clostridia;o__Clostridiales;f__	0.0119892	0.0134305	0.0127646	0.00659293	0.00530055	0.00737721	0.00714861	0.0106584	0.00766693	0.00304279	0.00605121	0.00641357	0.00594625	0.00829395	0.00935491	0.012738	0.00890534	0.0548272	0.00620996	0.00785146	0.00825976	0.00942467	0.0125162	0.0137493	0.0105128	0.00462094	0.00492418	0.00445259	0.00376573	0.00478918	0.00520181	0.0108054	0.00964056	0.0122733	0.00439048	0.00907129	0.00456252	0.0071328	0.00617813	0.00858787	0.00540758	0.00500724	0.00591722	0.00636122	0.00747564	0.00643378	0.00917351	0.00809351	0.00725325
k__Bacteria;p__Firmicutes;c__Clostridia;o__Clostridiales;f__Christensenellaceae	0.000377779	0.000358594	0.000381969	9.58584e-05	7.17583e-05	0.000113676	0.000169644	0.000207103	0.000206454	5.93716e-05	7.53943e-05	0.000149068	0.000156893	0.000184046	0.000215936	0.000345989	0.000238488	0.00169247	0.000155393	0.000124799	0.000175989	0.000196951	0.000384348	0.000442966	0.000328331	8.73611e-05	0.00010071	4.10107e-05	9.95973e-05	7.74114e-05	0.000112416	0.000315486	0.000198588	0.000385951	0.000177992	0.000157488	6.05645e-05	0.000263032	0.000252742	0.000188904	0.000112658	8.74082e-05	0.00011019	8.35432e-05	0.000118661	0.000110546	0.000217898	0.00019235	0.000185981
k__Bacteria;p__Firmicutes;c__Clostridia;o__Clostridiales;f__Clostridiaceae	0.0134824	0.0158734	0.0184086	0.15987	0.183295	0.130085	0.0111729	0.00859847	0.0103837	0.171579	0.100838	0.0281521	0.1739	0.0292337	0.0201656	0.318536	0.316901	0.040641	0.0321779	0.0430664	0.0263749	0.284154	0.0162918	0.0201767	0.0138735	0.186383	0.167009	0.179451	0.169292	0.066099	0.0297495	0.0153011	0.0135221	0.0151679	0.141445	0.0309778	0.13199	0.016834	0.0169196	0.0211573	0.0663072	0.174742	0.164746	0.179868	0.148326	0.166991	0.0229447	0.0266035	0.0154922
k__Bacteria;p__Firmicutes;c__Clostridia;o__Clostridiales;f__Dehalobacteriaceae	3.56396e-06	0	0	0	0	7.83976e-06	4.71234e-06	7.39653e-06	1.40764e-05	0	0	7.27162e-06	0	5.93697e-06	0	0	0	0.000101693	0	0	0	0	0	4.3428e-06	3.09746e-06	0	0	0	0	5.16076e-06	0	0	0	0	1.97769e-05	0	0	0	0	0	0	0	0	0	0	2.21092e-05	0	0	0
k__Bacteria;p__Firmicutes;c__Clostridia;o__Clostridiales;f__EtOH8	3.56396e-06	0	0	0	0	0	0	0	0	0	0	0	0	0	0	0	0	1.45276e-05	0	0	0	0	0	4.3428e-06	0	0	0	0	0	0	1.02197e-05	0	0	0	0	0	0	0	0	0	0	0	0	0	0	0	0	0	0
k__Bacteria;p__Firmicutes;c__Clostridia;o__Clostridiales;f__Eubacteriaceae	0	0	0	2.13019e-05	4.78389e-06	1.56795e-05	4.71234e-06	3.69827e-06	4.69213e-06	1.48429e-05	0	3.63581e-06	0	0	6.96568e-06	7.061e-06	1.62605e-05	2.17914e-05	0	0	1.17326e-05	2.31707e-05	2.26087e-05	0	0	0	0	0	0	2.0643e-05	5.10984e-06	1.31453e-05	0	0	0	0	0	4.64174e-05	0	0	0	0	2.20381e-05	0	0	0	0	1.47962e-05	3.71962e-05
k__Bacteria;p__Firmicutes;c__Clostridia;o__Clostridiales;f__Lachnospiraceae	0.0664036	0.0637344	0.0593192	0.0703707	0.0805511	0.0922582	0.0621698	0.0548897	0.0621003	0.0963699	0.0816258	0.0437351	0.0847798	0.0402527	0.0302311	0.0381153	0.0278651	0.319513	0.0190731	0.0220514	0.0233596	0.0243524	0.069481	0.0639738	0.0642042	0.0525546	0.0719227	0.0750145	0.0464882	0.0571657	0.0185947	0.0650296	0.0655883	0.0553261	0.0890159	0.0483487	0.103121	0.0518327	0.0557997	0.0551309	0.0709906	0.0729484	0.09375	0.0763704	0.0809267	0.0725846	0.0505088	0.0329511	0.0689059
k__Bacteria;p__Firmicutes;c__Clostridia;o__Clostridiales;f__Peptococcaceae	4.27675e-05	0.000100854	0.000182433	0.00011716	6.21905e-05	0.000113676	7.0685e-05	8.13618e-05	7.03819e-05	0.0001039	0.000137676	5.09013e-05	3.66084e-05	5.34328e-05	9.05538e-05	7.061e-05	0.000157185	0.000283288	5.7553e-06	7.05383e-05	8.21283e-05	0.000179573	9.49565e-05	0.000143313	9.91188e-05	2.75877e-05	6.89067e-05	0.000111315	4.26846e-05	5.16076e-05	3.57689e-05	0.000170888	7.22139e-05	0.000173678	9.88846e-05	4.72463e-05	0	0.000232087	2.80824e-05	8.71865e-05	0.000193128	7.49213e-05	0.000132228	0.000119347	0.000163159	0.000110546	2.17898e-05	0.000162758	1.85981e-05
k__Bacteria;p__Firmicutes;c__Clostridia;o__Clostridiales;f__Peptostreptococcaceae	0.00143984	0.00152402	0.00158489	0.000511245	0.000894587	0.000544863	0.00173414	0.00072486	0.00179239	0.0120425	0.000894897	0.00235964	0.00496305	0.00153174	0.000898573	0.00381294	0.00216265	0.00522994	0.00443733	0.00818244	0.00290969	0.0019	0.00165043	0.00162421	0.00111199	0.0056233	0.000349834	0.00153497	0.00813853	0.00390153	0.00149207	0.00166945	0.00247333	0.00175608	0.0100862	0.0012284	0.00944806	0.00374433	0.00366475	0.00370543	0.0102036	0.00131112	0.000793371	0.000871236	0.00100862	0.000751713	0.0029852	0.00207147	0.00375681
k__Bacteria;p__Firmicutes;c__Clostridia;o__Clostridiales;f__Ruminococcaceae	0.0327385	0.0354167	0.0354148	0.0191291	0.0161648	0.0200698	0.017921	0.0293827	0.0186934	0.0109639	0.015092	0.0167356	0.0148212	0.0201738	0.0227081	0.0232024	0.0168405	0.181065	0.0114128	0.0148999	0.0153521	0.0199615	0.0361694	0.0363319	0.0336973	0.0146031	0.017656	0.0113424	0.0106901	0.0136244	0.0152631	0.0322191	0.0286328	0.0367619	0.0147931	0.022568	0.0159486	0.0207176	0.0216375	0.023395	0.0180896	0.0161331	0.0159666	0.0155748	0.0213738	0.0186602	0.0230536	0.0222683	0.0213692
k__Bacteria;p__Firmicutes;c__Clostridia;o__Clostridiales;f__Veillonellaceae	0.0180764	0.0289452	0.0274333	0.100577	0.148329	0.0976324	0.0118421	0.0149965	0.0104118	0.0712706	0.0831009	0.0514249	0.0689807	0.0396234	0.0370713	0.0571164	0.052451	0.0363916	0.0212601	0.0317477	0.0239756	0.0542483	0.028288	0.0404836	0.0168316	0.103776	0.100545	0.100869	0.0784637	0.126588	0.0554315	0.0191132	0.0270983	0.0235623	0.0839135	0.0445218	0.104474	0.0216924	0.0223255	0.0196606	0.0882112	0.0816518	0.0841524	0.0660707	0.0873493	0.0821136	0.0322053	0.0403196	0.0169986
k__Bacteria;p__Firmicutes;c__Clostridia;o__Clostridiales;f__[Acidaminobacteraceae]	0	0	0	0	0	0	0	0	0	0	0	0	0	0	0	0	0	0	0	0	0	0	0	0	0	0	0	0	0	0	0	0	0	0	0	0	0	0	0	0	0	0	0	0	0	0	0	0	0
k__Bacteria;p__Firmicutes;c__Clostridia;o__Clostridiales;f__[Mogibacteriaceae]	0.000392035	0.000352991	0.00038767	0.000101184	4.3055e-05	7.44777e-05	0.000188493	0.000273672	0.000281528	5.44239e-05	6.88382e-05	0.00011271	6.7987e-05	0.000148424	0.000125382	5.6488e-05	0.000124664	0.00111136	1.72659e-05	6.51123e-05	0.000117326	9.26827e-05	0.000384348	0.000416909	0.000331428	7.81652e-05	6.89067e-05	8.20215e-05	5.69128e-05	5.67683e-05	5.10984e-05	0.000341777	0.000126374	0.000289464	9.88846e-05	9.44927e-05	2.01882e-05	0.000170197	0.000322948	0.000174373	0.000128752	9.98951e-05	0.000176305	9.54779e-05	0.000118661	4.42184e-05	0.000217898	0.000207147	0.000260373
k__Bacteria;p__Firmicutes;c__Clostridia;o__Clostridiales;f__[Tissierellaceae]	9.97908e-05	0.000123267	7.98144e-05	0.00011716	4.78389e-06	0.000223433	5.6548e-05	9.61549e-05	7.97661e-05	2.47381e-05	6.55602e-05	5.09013e-05	3.13786e-05	2.37479e-05	4.17941e-05	6.3549e-05	4.33614e-05	7.99018e-05	5.7553e-06	3.25561e-05	1.75989e-05	4.63414e-05	0.000104	9.98845e-05	0.000105314	4.13816e-05	8.48082e-05	8.78802e-05	1.89709e-05	2.0643e-05	1.53295e-05	3.94358e-05	7.22139e-05	0.000115785	1.97769e-05	6.29951e-05	6.05645e-05	0.000139252	8.42472e-05	0.000261559	1.6094e-05	4.99476e-05	9.91714e-05	0.000107413	0.000148326	4.42184e-05	6.53694e-05	2.95924e-05	0.000148785
k__Bacteria;p__Firmicutes;c__Clostridia;o__SHA-98;f__	0	0	0	0	0	0	0	0	0	0	0	0	0	0	0	0	0	7.2638e-06	0	0	0	0	0	4.3428e-06	0	0	0	0	0	0	0	0	0	1.92976e-05	0	1.57488e-05	0	0	0	0	0	0	0	0	0	0	0	0	0
k__Bacteria;p__Firmicutes;c__Erysipelotrichi;o__Erysipelotrichales;f__Erysipelotrichaceae	0.00330379	0.00411262	0.00397362	0.00459588	0.00453991	0.00401787	0.0039348	0.00220786	0.00266513	0.00589263	0.00299282	0.00523556	0.00207099	0.00192952	0.00130955	0.0012851	0.000601639	0.00323239	0.000230212	0.00045036	0.000357845	0.000637194	0.00226087	0.00243631	0.00131023	0.00129203	0.00142584	0.00186892	0.00186864	0.0020643	0.00144608	0.00332575	0.00413425	0.00347356	0.00672415	0.0090083	0.00567287	0.00507496	0.00372092	0.00319684	0.00885169	0.00245992	0.00255642	0.00236308	0.00323351	0.00320584	0.00690737	0.00692461	0.00492849
k__Bacteria;p__Fusobacteria;c__Fusobacteriia;o__Fusobacteriales;f__Fusobacteriaceae	0	0	0	0	0	0	0	3.69827e-06	0	0	3.27801e-06	0	0	0	0	0	0	7.2638e-06	0	0	0	0	4.52174e-06	0	0	0	0	0	0	0	0	0	0	0	0	0	2.01882e-05	0	0	0	0	0	0	0	2.96652e-05	4.42184e-05	2.17898e-05	0	0
k__Bacteria;p__Fusobacteria;c__Fusobacteriia;o__Fusobacteriales;f__Leptotrichiaceae	0	0	0	0	0	0	0	0	0	0	0	0	0	0	0	0	0	0	0	0	0	0	0	0	0	0	0	0	0	0	0	0	0	0	0	0	0	0	0	0	0	0	0	0	0	0	0	0	0
k__Bacteria;p__Lentisphaerae;c__[Lentisphaeria];o__Victivallales;f__Victivallaceae	0	0	0	0	0	0	0	0	0	0	0	0	0	5.93697e-06	0	0	0	0	0	1.62781e-05	0	0	4.52174e-06	0	0	0	0	0	0	0	0	0	0	0	0	0	0	0	0	0	0	0	1.1019e-05	0	0	0	0	0	0
k__Bacteria;p__OD1;c__ZB2;o__;f__	0	0	0	0	0	0	0	0	0	0	0	0	0	0	0	0	0	0	0	0	0	0	0	0	3.09746e-06	0	0	0	0	0	0	0	0	0	0	0	0	0	0	0	0	0	0	0	0	0	0	0	0
k__Bacteria;p__Planctomycetes;c__Planctomycetia;o__Gemmatales;f__Gemmataceae	0	0	0	0	0	0	0	0	0	0	0	0	0	0	0	0	0	0	0	0	0	0	0	0	0	0	0	0	0	0	0	0	0	0	0	0	0	0	0	0	0	0	0	0	0	0	0	0	0
k__Bacteria;p__Proteobacteria;Other;Other;Other	0	0	0	5.32547e-06	0	3.91988e-06	0	3.69827e-06	4.69213e-06	1.48429e-05	3.27801e-06	0	0	0	6.96568e-06	0	5.42017e-06	0	0	0	0	0	0	0	0	0	0	0	0	0	0	0	0	0	0	0	2.01882e-05	0	0	0	1.6094e-05	0	1.1019e-05	2.38695e-05	2.96652e-05	2.21092e-05	0	0	0
k__Bacteria;p__Proteobacteria;c__Alphaproteobacteria;o__BD7-3;f__	0	0	0	0	0	0	0	0	0	0	0	0	0	0	0	0	0	0	0	0	0	0	9.04347e-06	0	6.19492e-06	0	0	0	0	0	0	0	0	0	0	0	0	0	0	0	0	0	0	0	0	0	0	0	0
k__Bacteria;p__Proteobacteria;c__Alphaproteobacteria;o__Caulobacterales;f__Caulobacteraceae	0	0	5.70103e-06	5.32547e-06	9.56778e-06	0	0	1.84913e-05	0	4.94763e-06	0	0	0	0	0	0	0	0	0	0	5.86631e-06	5.79267e-06	4.52174e-06	4.3428e-06	6.19492e-06	4.59795e-06	5.30051e-06	0	0	1.03215e-05	5.10984e-06	0	0	0	0	0	0	0	0	0	0	0	0	0	0	0	0	0	0
k__Bacteria;p__Proteobacteria;c__Alphaproteobacteria;o__RF32;f__	1.06919e-05	2.24121e-05	5.70103e-06	1.59764e-05	4.78389e-06	1.17596e-05	1.4137e-05	4.80775e-05	3.7537e-05	9.89526e-06	1.96681e-05	1.45432e-05	3.13786e-05	5.34328e-05	7.66225e-05	8.4732e-05	5.96219e-05	7.99018e-05	5.17977e-05	3.25561e-05	8.79946e-05	5.2134e-05	3.61739e-05	5.64564e-05	3.40721e-05	3.21857e-05	2.12021e-05	5.85868e-05	1.89709e-05	6.70898e-05	1.02197e-05	1.31453e-05	0	0	3.95538e-05	3.14976e-05	0	4.64174e-05	2.80824e-05	1.45311e-05	1.6094e-05	0	2.20381e-05	1.19347e-05	1.48326e-05	0	0	2.95924e-05	1.85981e-05
k__Bacteria;p__Proteobacteria;c__Alphaproteobacteria;o__Rhizobiales;f__Aurantimonadaceae	0	0	0	0	0	0	0	1.84913e-05	0	0	0	0	0	0	0	7.061e-06	0	0	0	0	0	0	1.35652e-05	0	0	0	0	5.85868e-06	0	0	0	0	0	0	0	0	0	0	0	0	0	0	0	0	0	0	0	0	0
k__Bacteria;p__Proteobacteria;c__Alphaproteobacteria;o__Rhizobiales;f__Beijerinckiaceae	0	0	5.70103e-06	0	0	0	0	3.69827e-06	0	0	0	0	0	0	0	0	0	0	0	0	0	0	4.52174e-06	0	3.09746e-06	0	1.0601e-05	0	0	0	0	0	0	0	0	0	0	0	0	0	0	0	0	0	0	0	0	0	0
k__Bacteria;p__Proteobacteria;c__Alphaproteobacteria;o__Rhizobiales;f__Bradyrhizobiaceae	0	0	0	0	0	0	0	0	4.69213e-06	0	3.27801e-06	0	0	0	0	0	0	0	0	0	1.17326e-05	0	0	0	6.19492e-06	0	0	0	0	5.16076e-06	0	0	0	0	0	0	0	0	0	0	0	0	0	0	0	0	0	0	0
k__Bacteria;p__Proteobacteria;c__Alphaproteobacteria;o__Rhizobiales;f__Brucellaceae	0	0	0	0	0	0	0	2.21896e-05	0	0	0	0	0	0	0	0	0	0	0	0	0	0	0	0	0	0	0	0	0	0	0	0	0	0	0	0	0	0	0	0	0	0	0	0	0	0	0	0	0
k__Bacteria;p__Proteobacteria;c__Alphaproteobacteria;o__Rhizobiales;f__Hyphomicrobiaceae	0	0	0	1.06509e-05	9.56778e-06	0	0	0	0	0	0	0	0	0	0	0	0	0	0	0	0	0	2.26087e-05	2.60568e-05	6.19492e-06	9.19591e-06	0	2.34347e-05	0	1.03215e-05	1.53295e-05	0	0	0	0	0	0	0	0	0	0	0	0	0	0	0	0	0	0
k__Bacteria;p__Proteobacteria;c__Alphaproteobacteria;o__Rhizobiales;f__Methylobacteriaceae	0	0	0	0	0	0	0	5.91723e-05	0	0	0	0	0	0	0	0	0	0	0	0	0	0	0	0	0	0	0	5.85868e-06	4.74273e-06	0	0	0	0	0	0	0	0	0	0	0	0	0	0	0	0	0	0	0	0
k__Bacteria;p__Proteobacteria;c__Alphaproteobacteria;o__Rhizobiales;f__Methylocystaceae	0	0	0	0	0	0	0	3.69827e-06	0	0	0	0	0	0	0	0	0	0	0	0	0	0	4.52174e-06	0	0	0	0	0	0	0	0	0	0	0	0	0	0	0	0	0	0	0	0	0	0	0	0	0	0
k__Bacteria;p__Proteobacteria;c__Alphaproteobacteria;o__Rhizobiales;f__Rhizobiaceae	0	0	0	5.32547e-06	0	0	0	0.00019231	9.38425e-06	0	0	3.63581e-06	0	0	0	0	0	0	0	0	0	0	0	4.3428e-06	1.23898e-05	4.59795e-06	0	5.85868e-06	9.48546e-06	0	0	0	0	0	0	0	0	0	0	0	0	0	0	0	0	0	0	0	0
k__Bacteria;p__Proteobacteria;c__Alphaproteobacteria;o__Rhodobacterales;f__Rhodobacteraceae	0	0	0	0	0	0	0	0	0	0	0	0	0	0	0	0	0	0	0	0	0	0	0	0	0	0	0	0	0	0	5.10984e-06	0	0	0	0	0	0	0	0	0	0	0	0	0	0	0	0	0	0
k__Bacteria;p__Proteobacteria;c__Alphaproteobacteria;o__Rhodospirillales;f__Acetobacteraceae	0	0	0	0	0	0	0	1.84913e-05	4.69213e-06	0	0	0	0	0	0	0	0	0	0	0	0	0	0	8.68561e-06	0	0	0	0	0	0	0	0	0	0	0	0	0	0	0	0	0	0	0	0	0	0	0	0	0
k__Bacteria;p__Proteobacteria;c__Alphaproteobacteria;o__Rhodospirillales;f__Rhodospirillaceae	0	0	0	0	0	7.83976e-06	0	3.69827e-06	0	0	0	0	0	0	0	0	0	0	0	0	0	0	0	0	0	0	0	0	0	0	0	0	0	0	0	0	0	0	0	0	0	0	0	0	0	0	0	0	0
k__Bacteria;p__Proteobacteria;c__Alphaproteobacteria;o__Rickettsiales;f__Pelagibacteraceae	0	0	0	0	0	0	0	0	0	0	0	0	0	0	0	0	0	0	0	0	0	0	0	0	0	0	0	0	0	0	0	0	0	1.92976e-05	0	0	0	0	0	1.45311e-05	0	0	0	0	0	0	0	0	0
k__Bacteria;p__Proteobacteria;c__Alphaproteobacteria;o__Rickettsiales;f__Rickettsiaceae	0	0	0	0	0	0	0	7.39653e-06	0	0	0	0	0	0	0	0	0	0	0	0	0	0	0	0	0	0	0	0	0	0	0	0	0	0	0	0	0	0	0	0	0	0	0	0	0	0	0	0	0
k__Bacteria;p__Proteobacteria;c__Alphaproteobacteria;o__Rickettsiales;f__mitochondria	0	0	0	0	0	0	0	1.10948e-05	0	0	0	1.09074e-05	0	0	0	0	0	0	0	0	0	0	0	0	0	0	0	0	0	0	0	0	0	0	0	0	0	0	0	0	0	0	0	0	0	0	0	0	0
k__Bacteria;p__Proteobacteria;c__Alphaproteobacteria;o__Sphingomonadales;f__Sphingomonadaceae	0	0	1.14021e-05	0	0	0	0	0.000247784	2.81528e-05	0	0	0	0	0	0	0	0	0	0	0	0	0	1.35652e-05	8.68561e-06	1.23898e-05	9.19591e-06	0	0	4.74273e-06	0	2.55492e-05	0	0	0	0	0	0	0	0	0	0	0	0	0	0	0	0	0	0
k__Bacteria;p__Proteobacteria;c__Betaproteobacteria;Other;Other	0	0	2.28041e-05	2.13019e-05	4.78389e-06	2.74391e-05	0	0	0	1.97905e-05	4.58922e-05	1.09074e-05	1.04595e-05	5.93697e-06	6.96568e-06	1.4122e-05	0	1.45276e-05	1.15106e-05	0	0	0	0	0	3.09746e-06	4.59795e-06	0	5.85868e-06	0	0	0	0	3.61069e-05	0	0	0	6.05645e-05	3.09449e-05	0	0	0	0	6.61142e-05	3.58042e-05	2.96652e-05	6.63277e-05	2.17898e-05	0	0
k__Bacteria;p__Proteobacteria;c__Betaproteobacteria;o__;f__	0	0	0	0	0	0	0	0	0	0	1.3112e-05	0	0	0	0	0	0	0	5.7553e-06	0	0	0	0	0	0	0	0	0	0	0	0	1.31453e-05	0	0	0	0	0	0	0	1.45311e-05	0	0	0	1.19347e-05	0	0	0	0	0
k__Bacteria;p__Proteobacteria;c__Betaproteobacteria;o__Burkholderiales;Other	0	0	0	0	0	0	0	0	0	0	0	0	0	0	0	0	0	0	0	0	0	0	0	0	0	0	0	0	0	0	0	0	0	0	0	0	0	0	0	0	0	0	0	0	0	0	0	0	0
k__Bacteria;p__Proteobacteria;c__Betaproteobacteria;o__Burkholderiales;f__	0	5.60303e-06	5.70103e-06	3.19528e-05	1.43517e-05	1.56795e-05	1.4137e-05	3.69827e-06	0	2.47381e-05	9.83403e-06	3.63581e-06	1.56893e-05	0	6.96568e-06	4.2366e-05	3.2521e-05	0	5.7553e-06	0	0	1.7378e-05	0	0	3.09746e-06	1.83918e-05	1.59015e-05	5.85868e-06	4.74273e-06	5.16076e-06	5.10984e-06	1.31453e-05	1.80535e-05	0	3.95538e-05	0	4.03763e-05	1.54725e-05	5.61648e-05	1.45311e-05	0.000112658	3.74607e-05	2.20381e-05	1.19347e-05	4.44978e-05	8.84369e-05	0	1.47962e-05	1.85981e-05
k__Bacteria;p__Proteobacteria;c__Betaproteobacteria;o__Burkholderiales;f__Alcaligenaceae	0.00271217	0.00156324	0.00161909	0.00334972	0.00203794	0.00774176	0.015447	0.0162798	0.0178395	0.00270635	0.0230182	0.00130889	0.00332613	0.000813365	0.000682637	0.00168758	0.00127916	0.0014237	0.000241722	0.000282153	0.000316781	0.00143658	0.00129322	0.00164592	0.00203503	0.00234955	0.00535352	0.00867084	0.00188286	0.000283842	0.000388348	0.00199808	0.00169703	0.00123504	0.00397516	0.00116541	0.0023822	0.00126874	0.00205001	0.00138045	0.0010622	0.00448279	0.00253438	0.00378331	0.0204245	0.00296264	0.00115486	0.000680624	0.0019714
k__Bacteria;p__Proteobacteria;c__Betaproteobacteria;o__Burkholderiales;f__Comamonadaceae	1.06919e-05	5.60303e-06	1.14021e-05	0	9.56778e-06	0	0	4.43792e-05	0	0	0	0	0	0	0	7.061e-06	0	0	5.7553e-06	0	5.86631e-06	5.79267e-06	1.35652e-05	8.68561e-06	6.19492e-06	0	0	1.17174e-05	0	0	5.10984e-06	0	0	0	0	0	0	0	0	0	0	0	0	0	0	0	0	0	0
k__Bacteria;p__Proteobacteria;c__Betaproteobacteria;o__Burkholderiales;f__Oxalobacteraceae	1.78198e-05	1.68091e-05	4.56082e-05	2.13019e-05	1.43517e-05	7.83976e-06	3.76987e-05	4.80775e-05	2.34606e-05	0	3.27801e-06	7.27162e-06	0	5.93697e-06	3.48284e-05	7.061e-06	5.42017e-06	0.000138012	5.7553e-06	1.0852e-05	1.75989e-05	5.79267e-06	4.06956e-05	3.47424e-05	1.23898e-05	0	0	0	1.42282e-05	1.03215e-05	1.02197e-05	0	0	0	0	0.000188985	6.05645e-05	0	0	0	0	0	0	0	0	0	0	0	0
k__Bacteria;p__Proteobacteria;c__Betaproteobacteria;o__Methylophilales;f__Methylophilaceae	0	0	0	0	0	0	0	0	0	0	0	0	0	0	0	0	0	0	0	0	0	0	0	0	0	0	0	0	0	0	0	0	0	0	0	0	0	0	0	0	0	0	0	0	0	0	0	0	0
k__Bacteria;p__Proteobacteria;c__Betaproteobacteria;o__Neisseriales;f__Neisseriaceae	0	0	0	0	0	0	0	0	0	0	0	0	0	0	0	0	0	0	0	0	0	0	0	0	6.19492e-06	0	0	0	0	0	0	0	0	0	0	0	0	0	0	0	0	0	0	0	0	0	0	0	0
k__Bacteria;p__Proteobacteria;c__Betaproteobacteria;o__Rhodocyclales;f__Rhodocyclaceae	0	0	0	0	0	3.91988e-06	0	0	0	0	0	0	0	0	0	0	0	0	0	0	0	0	0	0	0	0	0	0	0	0	0	0	0	0	0	0	0	0	0	0	0	0	0	0	0	0	0	0	0
k__Bacteria;p__Proteobacteria;c__Deltaproteobacteria;o__Bdellovibrionales;f__Bdellovibrionaceae	0	0	0	0	0	0	0	0	0	0	0	0	0	0	0	0	0	0	0	0	0	0	0	8.68561e-06	0	0	0	0	0	0	0	0	0	0	0	0	0	0	0	0	0	0	0	0	0	0	0	0	0
k__Bacteria;p__Proteobacteria;c__Deltaproteobacteria;o__Desulfovibrionales;f__Desulfovibrionaceae	0.000566669	0.000459448	0.000513092	0.000244971	0.000306169	0.000509584	0.000433535	0.000691576	0.000487981	0.000425496	0.000632656	0.000628995	0.000397463	0.000397777	0.000501529	0.000840259	0.00146345	0.00140191	0.000581285	0.000515472	0.000439973	0.00115274	0.000375304	0.000651421	0.000628785	0.000285073	0.000323331	0.000322227	0.000455302	0.000402539	0.000485434	0.000525811	0.000704086	0.000578927	0.000296654	0.000629951	0.000524892	0.000355866	0.000547607	0.00066843	0.000531102	0.000511962	0.000429743	0.00047739	0.0006823	0.000420075	0.000610115	0.000562255	0.000316167
k__Bacteria;p__Proteobacteria;c__Deltaproteobacteria;o__MIZ46;f__	0	0	0	0	0	0	0	3.69827e-06	0	0	0	0	0	0	0	0	0	0	0	0	0	0	0	0	0	0	0	0	0	0	0	0	0	0	0	0	0	0	0	0	0	0	0	0	0	0	0	0	0
k__Bacteria;p__Proteobacteria;c__Deltaproteobacteria;o__Syntrophobacterales;f__Syntrophobacteraceae	0	0	0	0	0	0	0	0	0	0	0	0	0	0	0	0	0	0	0	0	0	0	0	0	0	0	0	0	0	0	0	0	0	0	0	0	0	0	0	0	0	0	0	0	0	0	0	0	0
k__Bacteria;p__Proteobacteria;c__Epsilonproteobacteria;o__Campylobacterales;f__Campylobacteraceae	0	5.60303e-06	1.14021e-05	0	4.78389e-06	7.83976e-06	0	3.69827e-06	0	0	3.27801e-06	0	0	1.78109e-05	1.39314e-05	0	0	0	0	0	0	0	0	0	3.09746e-06	0	0	0	0	1.03215e-05	1.02197e-05	0	0	0	0	0	0	0	0	0	0	0	0	1.19347e-05	0	0	2.17898e-05	0	1.85981e-05
k__Bacteria;p__Proteobacteria;c__Gammaproteobacteria;Other;Other	0	0	0	0	0	0	0	0	0	0	0	3.63581e-06	0	5.93697e-06	0	0	0	0	0	5.42602e-06	0	0	0	0	3.09746e-06	0	0	0	0	0	0	0	0	0	0	0	0	0	0	0	0	0	0	0	0	0	0	0	0
k__Bacteria;p__Proteobacteria;c__Gammaproteobacteria;o__;f__	0	0	0	0	0	0	0	0	0	0	0	0	0	0	0	0	0	0	0	0	0	0	0	0	0	0	0	0	0	0	0	0	0	0	0	0	0	0	0	0	0	0	0	0	0	0	0	0	0
k__Bacteria;p__Proteobacteria;c__Gammaproteobacteria;o__Aeromonadales;f__Aeromonadaceae	0	0	0	0	0	0	0	3.69827e-06	0	0	0	0	0	0	0	0	0	0	0	0	0	0	0	0	0	0	0	0	0	0	0	0	0	0	0	0	0	0	0	0	0	0	0	0	0	0	0	0	0
k__Bacteria;p__Proteobacteria;c__Gammaproteobacteria;o__Aeromonadales;f__Succinivibrionaceae	0	0	0	0	0	0	0	0	0	0	0	0	0	0	0	0	0	0	5.7553e-06	0	0	0	1.80869e-05	0	0	0	0	0	0	0	0	0	0	0	0	0	0	0	0	0	0	0	0	0	0	0	0	0	0
k__Bacteria;p__Proteobacteria;c__Gammaproteobacteria;o__Alteromonadales;f__Colwelliaceae	0	0	0	0	0	0	0	0	0	0	0	0	0	0	0	0	0	0	0	0	0	0	0	0	0	0	0	0	0	0	0	0	0	0	0	0	0	0	0	0	0	0	0	0	0	0	0	2.95924e-05	0
k__Bacteria;p__Proteobacteria;c__Gammaproteobacteria;o__Alteromonadales;f__Shewanellaceae	0	5.60303e-06	0	0	0	0	0	0	4.69213e-06	0	0	0	5.22977e-06	0	0	0	0	0	0	5.42602e-06	0	0	0	0	0	0	0	0	0	0	0	0	0	0	0	0	0	0	0	0	0	0	0	0	0	0	0	0	0
k__Bacteria;p__Proteobacteria;c__Gammaproteobacteria;o__Alteromonadales;f__[Chromatiaceae]	0	0	0	0	4.78389e-06	0	0	0	0	0	0	0	0	0	0	0	0	0	0	0	0	0	0	8.68561e-06	3.09746e-06	0	0	0	1.42282e-05	1.54823e-05	0	0	0	0	0	0	0	0	0	0	0	0	0	0	0	0	0	0	0
k__Bacteria;p__Proteobacteria;c__Gammaproteobacteria;o__Cardiobacteriales;f__Cardiobacteriaceae	0	0	0	0	0	0	0	0	0	0	0	7.27162e-06	0	0	0	0	0	7.2638e-06	0	0	0	0	0	0	0	0	0	0	0	0	0	0	0	0	0	0	0	0	0	0	0	0	0	0	0	0	0	0	0
k__Bacteria;p__Proteobacteria;c__Gammaproteobacteria;o__Chromatiales;f__Chromatiaceae	0	0	0	0	0	0	0	0	0	0	0	0	0	0	0	0	0	0	0	0	0	0	0	0	0	0	0	0	0	0	5.10984e-06	0	0	0	0	0	0	0	0	0	0	0	0	0	0	0	0	0	0
k__Bacteria;p__Proteobacteria;c__Gammaproteobacteria;o__Enterobacteriales;f__Enterobacteriaceae	0.0551522	0.0690069	0.0656473	0.134026	0.0529385	0.13199	0.0808637	0.0357474	0.0955927	0.111821	0.131491	0.166575	0.144227	0.198788	0.203468	0.239213	0.30482	0.00449629	0.301773	0.262734	0.259009	0.26023	0.0730939	0.079647	0.0690238	0.137543	0.150524	0.14509	0.23495	0.231501	0.248706	0.0651479	0.127259	0.0577383	0.136283	0.142999	0.110066	0.148087	0.120586	0.140007	0.154293	0.140153	0.164316	0.178675	0.163337	0.15461	0.156342	0.192025	0.126355
k__Bacteria;p__Proteobacteria;c__Gammaproteobacteria;o__Legionellales;f__Coxiellaceae	0	0	0	0	0	0	0	0.00010725	9.38425e-06	0	0	0	0	0	0	0	0	0	0	0	0	0	0	0	0	0	0	0	4.74273e-06	0	0	0	0	0	0	0	0	0	0	0	0	0	0	0	0	0	0	0	0
k__Bacteria;p__Proteobacteria;c__Gammaproteobacteria;o__Legionellales;f__Francisellaceae	0	0	0	0	0	0	0	0	0	0	0	0	0	0	0	0	0	0	0	0	0	0	0	0	0	0	0	0	0	0	0	0	0	0	0	0	0	0	0	0	0	0	0	0	0	0	0	0	0
k__Bacteria;p__Proteobacteria;c__Gammaproteobacteria;o__Oceanospirillales;f__Halomonadaceae	0	0	0	0	0	0	0	0	0	0	0	0	0	0	0	0	0	0	0	0	0	0	0	0	0	0	0	0	0	0	0	0	0	0	0	0	0	0	0	0	0	0	0	0	0	0	0	0	0
k__Bacteria;p__Proteobacteria;c__Gammaproteobacteria;o__Oceanospirillales;f__Oceanospirillaceae	0	0	0	0	0	0	0	0	0	0	0	0	0	0	0	0	0	0	0	0	0	0	0	0	0	0	0	0	0	0	0	0	0	0	0	0	0	0	0	0	0	0	0	0	0	0	0	0	0
k__Bacteria;p__Proteobacteria;c__Gammaproteobacteria;o__Pasteurellales;f__Pasteurellaceae	0.000203146	0.000218518	0.000324959	0.000266273	0.00017222	0.000337109	0.000113096	0.000247784	0.000117303	0.000168219	0.000452366	0.000239963	0.00023011	0.000219668	0.000215936	0.00119331	0.000916009	0.000464883	0.000212946	0.000211615	0.000258118	0.0012628	0.000321043	0.000364795	0.000235407	0.000160928	0.00041344	0.000187478	0.000237137	0.000190948	0.000204393	0.00024976	7.22139e-05	0.000289464	0.000177992	0.000173237	0.000141317	0.000185669	0.000280824	0.000188904	0.000209222	0.00016233	0.000352609	0.00022676	0.000563639	0.000508512	0.000152529	0.00031072	0.000204579
k__Bacteria;p__Proteobacteria;c__Gammaproteobacteria;o__Pseudomonadales;f__Moraxellaceae	3.56396e-06	0	5.70103e-06	5.32547e-06	1.43517e-05	7.83976e-06	0	3.69827e-06	0	0	0	7.27162e-06	0	0	6.96568e-06	0	5.42017e-06	0	1.15106e-05	0	0	0	4.52174e-06	1.73712e-05	2.16822e-05	2.75877e-05	1.59015e-05	0	1.42282e-05	0	0	5.25811e-05	0	1.92976e-05	0	0	0	0	5.61648e-05	0	0	0	0	0	0	0	0	0	0
k__Bacteria;p__Proteobacteria;c__Gammaproteobacteria;o__Pseudomonadales;f__Pseudomonadaceae	0	0	1.14021e-05	5.32547e-06	0	0	6.59727e-05	0.00017012	2.34606e-05	0	3.27801e-06	4.36297e-05	0	5.93697e-06	6.96568e-06	1.4122e-05	2.16807e-05	0	0	0	0	5.79267e-06	4.52174e-06	4.3428e-06	1.85848e-05	1.37939e-05	0	0	9.48546e-06	0	1.02197e-05	0	0	0	0	0	2.01882e-05	0	0	0	0	0	1.1019e-05	0	1.48326e-05	0	0	0	0
k__Bacteria;p__Proteobacteria;c__Gammaproteobacteria;o__Thiohalorhabdales;f__Thiohalorhabdaceae	0	0	0	0	0	0	0	0	0	0	0	0	0	0	0	0	0	0	0	0	0	0	0	0	0	0	0	0	0	0	0	0	0	0	0	0	0	0	0	0	0	0	0	0	0	0	0	0	0
k__Bacteria;p__Proteobacteria;c__Gammaproteobacteria;o__Vibrionales;f__Pseudoalteromonadaceae	0	0	0	0	0	0	0	0	0	0	0	0	0	0	0	0	0	0	0	0	0	0	0	0	0	0	0	0	0	0	0	0	0	0	0	0	0	0	0	0	0	0	0	0	0	0	0	0	0
k__Bacteria;p__Proteobacteria;c__Gammaproteobacteria;o__Vibrionales;f__Vibrionaceae	0	0	0	0	0	0	0	0	0	0	0	0	0	0	0	0	0	0	0	0	0	0	0	0	0	0	0	0	0	0	0	0	0	0	0	0	0	0	0	0	0	0	0	0	0	0	0	0	0
k__Bacteria;p__Proteobacteria;c__Gammaproteobacteria;o__Xanthomonadales;f__Xanthomonadaceae	0	0	0	0	0	3.91988e-06	5.18357e-05	0.000281068	9.38425e-06	0	3.27801e-06	0	0	0	0	0	0	0	0	1.0852e-05	0	0	0	0	3.09746e-06	9.19591e-06	0	1.17174e-05	0	0	5.10984e-06	0	0.000992941	0	3.95538e-05	0.000740192	0	0	0	0.00152576	0	0	1.1019e-05	0	2.96652e-05	0	0	0	1.85981e-05
k__Bacteria;p__SAR406;c__AB16;o__Arctic96B-7;f__A714017	0	0	0	0	0	0	0	0	0	0	0	0	0	0	0	0	0	0	0	0	0	0	0	0	0	0	0	0	0	0	0	0	0	0	0	0	0	0	0	0	0	0	0	0	0	0	0	0	0
k__Bacteria;p__Synergistetes;c__Synergistia;o__Synergistales;f__Dethiosulfovibrionaceae	0	5.60303e-06	0	0	0	0	0	0	0	0	0	0	0	0	0	0	0	0	0	0	0	0	0	0	0	0	0	0	0	0	0	0	0	0	0	0	0	0	0	0	0	0	0	0	0	0	0	0	0
k__Bacteria;p__TM7;c__TM7-1;o__;f__	0	0	1.14021e-05	0	0	0	0	0	0	0	0	0	0	0	0	0	0	0	0	0	5.86631e-06	0	4.52174e-06	8.68561e-06	6.19492e-06	0	1.59015e-05	1.7576e-05	0	0	2.04393e-05	0	0	0	0	0	0	0	0	0	0	0	0	0	0	0	0	0	0
k__Bacteria;p__TM7;c__TM7-3;o__;f__	3.56396e-06	1.68091e-05	5.70103e-06	1.59764e-05	0	1.56795e-05	0	2.21896e-05	0	9.89526e-06	3.27801e-06	1.8179e-05	0	1.18739e-05	1.39314e-05	1.4122e-05	1.08403e-05	4.35828e-05	5.7553e-06	1.62781e-05	5.86631e-06	1.7378e-05	9.04347e-06	1.30284e-05	9.29238e-06	4.59795e-06	5.30051e-06	0	9.48546e-06	5.16076e-06	1.02197e-05	1.31453e-05	1.80535e-05	0	0	1.57488e-05	0	0	0	0	0	0	0	0	1.48326e-05	2.21092e-05	0	0	0
k__Bacteria;p__TM7;c__TM7-3;o__CW040;f__	0	1.68091e-05	1.71031e-05	0	0	3.91988e-06	0	0	0	0	0	0	0	0	0	1.4122e-05	0	0	5.7553e-06	0	0	0	0	8.68561e-06	0	0	0	0	0	0	5.10984e-06	0	0	0	1.97769e-05	0	0	0	0	0	0	0	0	0	0	0	0	0	0
k__Bacteria;p__TM7;c__TM7-3;o__CW040;f__F16	0	0	0	0	0	0	0	0	0	0	0	0	0	0	0	0	0	0	0	0	0	0	0	0	0	0	0	0	0	0	0	0	0	0	0	0	0	0	0	1.45311e-05	0	0	0	0	0	0	0	0	0
k__Bacteria;p__TM7;c__TM7-3;o__I025;f__Rs-045	0	0	0	0	0	0	0	0	0	0	0	0	0	0	0	0	0	7.2638e-06	0	0	0	0	0	0	0	0	0	0	4.74273e-06	0	0	0	0	0	0	0	0	0	0	0	0	0	0	0	0	0	0	0	0
k__Bacteria;p__Tenericutes;c__Mollicutes;o__Anaeroplasmatales;f__Anaeroplasmataceae	7.12791e-06	0	0	0	0	0	0	0	0	0	0	0	0	0	0	0	0	0	0	0	0	0	0	0	0	0	0	0	0	0	0	0	1.80535e-05	0	0	0	0	0	1.40412e-05	0	0	0	0	0	0	0	0	0	0
k__Bacteria;p__Tenericutes;c__Mollicutes;o__RF39;f__	3.20756e-05	5.60303e-05	4.56082e-05	1.59764e-05	3.82711e-05	3.52789e-05	3.76987e-05	3.32844e-05	4.69213e-06	2.96858e-05	4.58922e-05	5.09013e-05	5.22977e-06	5.93697e-06	1.39314e-05	2.1183e-05	2.16807e-05	5.81104e-05	0	1.0852e-05	1.75989e-05	4.63414e-05	4.52174e-06	3.47424e-05	3.09746e-06	0	3.71036e-05	0	0	5.16076e-06	5.10984e-06	0.000131453	5.41604e-05	5.78927e-05	1.97769e-05	0.000110241	0	7.73623e-05	4.21236e-05	2.90622e-05	1.6094e-05	4.99476e-05	7.71333e-05	2.38695e-05	4.44978e-05	8.84369e-05	4.35796e-05	8.87771e-05	1.85981e-05
k__Bacteria;p__Tenericutes;c__RF3;o__ML615J-28;f__	3.56396e-06	0	5.70103e-06	0	9.56778e-06	0	0	3.69827e-06	0	0	0	0	5.22977e-06	5.93697e-06	0	7.061e-06	2.16807e-05	2.17914e-05	0	0	0	0	2.26087e-05	0	0	0	5.30051e-06	1.7576e-05	0	0	0	0	0	0	0	0	0	0	0	0	0	0	0	0	0	0	0	0	0
k__Bacteria;p__Verrucomicrobia;c__Opitutae;o__[Cerasicoccales];f__[Cerasicoccaceae]	0	0	0	0	0	0	0	0	0	0	0	0	0	0	0	0	0	0	0	0	0	0	0	0	0	0	0	0	0	0	0	0	0	0	0	0	0	0	0	1.45311e-05	0	0	0	0	0	0	0	0	0
k__Bacteria;p__Verrucomicrobia;c__Verrucomicrobiae;o__Verrucomicrobiales;f__Verrucomicrobiaceae	0.00114047	0.0014792	0.00120292	0.00103314	0.000674528	0.000795735	0.00056548	0.000920868	0.000539595	0.000880678	0.000698216	0.00194879	0.000324246	0.000498706	0.000376147	0.000289501	5.96219e-05	0.00172878	4.02871e-05	0.000320135	0.000357845	0.000237499	0.00052	0.000846847	0.000334526	0.00020231	0.000238523	0.000287075	0.000123311	0.000196109	0.000250382	0.00193235	0.00166092	0.00167889	0.00124595	0.00143314	0.000868091	0.00082004	0.000800348	0.00122061	0.00123924	0.000437041	0.000749295	0.000883171	0.00096412	0.000729604	0.00318131	0.00121329	0.00130187
k__Bacteria;p__[Thermi];c__Deinococci;o__Deinococcales;f__Deinococcaceae	0	0	0	5.32547e-06	0	0	0	0	0	0	0	0	0	0	0	0	0	0	0	0	2.34652e-05	0	1.35652e-05	4.3428e-06	0	0	0	0	4.74273e-06	0	0	0	0	0	0	0	0	0	0	0	0	0	0	0	0	0	0	0	0
[truncated: 66 more columns]

## Sheet: L6
# Constructed from biom file
#OTU ID	S1	S2	S3	S4	S5	S6	S7	S8	S9	S10	S11	S12	S13	S14	S15	S16	S17	S18	S19	S20	S21	S22	S23	S24	S25	S26	S27	S28	S29	S30	S31	S32	S33	S34	S35	S36	S37	S38	S39	S40	S41	S42	S43	S44	S45	S46	S47	S48	S49
Unassigned;Other;Other;Other;Other;Other	0.0146158	0.0147135	0.0133974	0.0171853	0.0147487	0.0150563	0.0139768	0.0138537	0.0145972	0.0132695	0.0160655	0.0210804	0.0131215	0.0105797	0.00875586	0.00869915	0.00768038	0.00509919	0.00879985	0.00919711	0.0116857	0.00746096	0.00910225	0.0123379	0.00934504	0.00886945	0.00702848	0.00923327	0.00701924	0.0080353	0.00746547	0.0312069	0.033074	0.0329602	0.0389605	0.0265209	0.0384988	0.0307592	0.0315646	0.0284955	0.0282289	0.0269592	0.0351838	0.0356252	0.033581	0.0312403	0.0354738	0.0290597	0.0361547
k__Archaea;p__Euryarchaeota;c__Methanobacteria;o__Methanobacteriales;f__Methanobacteriaceae;g__Methanobrevibacter	4.98954e-05	7.28393e-05	7.41133e-05	5.32547e-06	0	1.17596e-05	1.4137e-05	2.58879e-05	2.81528e-05	0	9.83403e-06	3.63581e-06	5.22977e-06	0	6.96568e-06	2.8244e-05	1.62605e-05	7.2638e-05	0	5.42602e-06	0	1.7378e-05	1.80869e-05	1.73712e-05	2.16822e-05	0	1.59015e-05	5.85868e-06	0	0	0	5.25811e-05	7.22139e-05	9.64878e-05	0	0	0	1.54725e-05	0	5.81243e-05	1.6094e-05	1.24869e-05	0	3.58042e-05	0	0	0	4.43885e-05	1.85981e-05
k__Bacteria;Other;Other;Other;Other;Other	0	1.12061e-05	0	0	0	0	0	0	0	0	0	7.27162e-06	0	0	0	0	0	0	0	0	5.86631e-06	0	0	0	0	0	0	0	0	0	0	0	0	0	0	0	0	0	0	0	0	0	0	0	0	0	0	0	0
k__Bacteria;p__Actinobacteria;Other;Other;Other;Other	0	0	0	0	0	0	0	0	0	0	0	0	0	0	0	0	0	0	0	0	0	0	0	0	0	0	0	0	0	0	0	0	0	0	0	0	0	1.54725e-05	0	0	0	0	0	0	0	0	0	0	0
k__Bacteria;p__Actinobacteria;c__Actinobacteria;o__Actinomycetales;Other;Other	0	0	5.70103e-06	0	0	0	0	7.39653e-06	0	0	0	0	0	0	0	0	0	0	0	0	0	0	0	0	0	0	0	0	0	0	0	0	0	0	0	0	0	0	0	0	0	0	0	0	0	0	0	0	0
k__Bacteria;p__Actinobacteria;c__Actinobacteria;o__Actinomycetales;f__Actinomycetaceae;g__	0	0	0	1.06509e-05	0	0	0	0	0	0	0	0	5.22977e-06	0	6.96568e-06	1.4122e-05	0	1.45276e-05	1.15106e-05	5.42602e-06	0	0	1.35652e-05	4.3428e-06	0	4.59795e-06	5.30051e-06	5.85868e-06	0	0	1.02197e-05	1.31453e-05	0	1.92976e-05	0	0	0	0	0	1.45311e-05	0	0	0	0	0	0	2.17898e-05	0	3.71962e-05
k__Bacteria;p__Actinobacteria;c__Actinobacteria;o__Actinomycetales;f__Actinomycetaceae;g__Actinomyces	6.41512e-05	0.000112061	6.84123e-05	6.92311e-05	4.3055e-05	0.000105837	4.71234e-05	3.69827e-05	4.22291e-05	7.42144e-05	0.000104896	7.6352e-05	0.000130744	8.90546e-05	0.000139314	0.000444843	0.000238488	0.000813546	0.000120861	0.000189911	0.000152524	0.00026067	8.5913e-05	0.000204112	7.12416e-05	0.000124145	0.000132513	7.03041e-05	6.16555e-05	0.000118697	0.000168625	0.000170888	9.02674e-05	3.85951e-05	5.93307e-05	0.000141739	4.03763e-05	9.28347e-05	9.82884e-05	0.000159842	0.000144846	0.00016233	0.000132228	0.000202891	0.000148326	8.84369e-05	0.000152529	0.000177554	3.71962e-05
k__Bacteria;p__Actinobacteria;c__Actinobacteria;o__Actinomycetales;f__Actinomycetaceae;g__Mobiluncus	0	0	0	0	0	0	0	0	0	0	0	0	0	5.93697e-06	0	0	0	0	0	5.42602e-06	0	0	0	0	0	0	5.30051e-06	0	0	0	0	0	0	0	0	0	0	0	0	0	0	0	0	0	0	0	0	0	0
k__Bacteria;p__Actinobacteria;c__Actinobacteria;o__Actinomycetales;f__Actinomycetaceae;g__Varibaculum	0	1.12061e-05	0	5.32547e-06	0	3.91988e-06	0	0	0	9.89526e-06	0	0	0	0	0	0	5.42017e-06	7.2638e-06	0	1.0852e-05	5.86631e-06	0	0	4.3428e-06	0	0	1.0601e-05	0	0	5.16076e-06	0	1.31453e-05	0	0	0	0	0	0	1.40412e-05	0	0	0	0	1.19347e-05	0	4.42184e-05	0	0	0
k__Bacteria;p__Actinobacteria;c__Actinobacteria;o__Actinomycetales;f__Brevibacteriaceae;g__Brevibacterium	0	0	0	0	0	0	0	0	0	0	0	0	0	0	0	0	0	1.45276e-05	0	0	0	0	0	0	0	0	0	0	0	0	0	0	0	0	0	0	0	0	0	0	0	0	0	0	0	0	0	0	1.85981e-05
k__Bacteria;p__Actinobacteria;c__Actinobacteria;o__Actinomycetales;f__Cellulomonadaceae;g__Cellulomonas	0	0	0	0	0	0	0	1.10948e-05	9.38425e-06	0	0	0	0	0	0	0	0	0	0	0	0	0	0	0	0	0	0	0	0	0	0	0	0	0	0	0	0	0	0	0	0	0	0	0	0	0	0	0	0
k__Bacteria;p__Actinobacteria;c__Actinobacteria;o__Actinomycetales;f__Corynebacteriaceae;g__Corynebacterium	2.49477e-05	0	0	1.06509e-05	0	0	0	3.69827e-06	4.69213e-06	9.89526e-06	3.27801e-06	3.63581e-06	0	0	0	7.061e-06	5.42017e-06	2.17914e-05	0	0	5.86631e-06	1.7378e-05	1.35652e-05	0	3.09746e-06	4.59795e-06	0	5.85868e-06	9.48546e-06	0	5.10984e-06	0	0	0	0	0	0	0	0	1.45311e-05	0	2.49738e-05	0	4.7739e-05	1.48326e-05	0	0	2.95924e-05	0
k__Bacteria;p__Actinobacteria;c__Actinobacteria;o__Actinomycetales;f__Dermacoccaceae;g__Dermacoccus	0	0	0	0	0	0	0	0	0	0	0	0	0	0	0	0	0	0	0	0	0	0	0	0	0	0	0	0	0	0	0	0	0	0	0	0	0	0	0	0	0	0	0	0	0	0	0	0	0
k__Bacteria;p__Actinobacteria;c__Actinobacteria;o__Actinomycetales;f__Frankiaceae;g__	0	0	0	0	0	0	0	3.69827e-06	0	0	0	0	0	0	0	0	0	0	0	0	0	0	0	0	0	0	0	0	0	0	0	0	0	0	0	0	0	0	0	0	0	0	0	0	0	0	0	0	0
k__Bacteria;p__Actinobacteria;c__Actinobacteria;o__Actinomycetales;f__Geodermatophilaceae;g__	0	0	0	0	0	0	0	3.69827e-06	0	0	0	0	0	0	0	0	0	0	0	0	0	0	0	0	0	0	0	0	0	0	0	0	0	0	0	0	0	0	0	0	0	0	0	0	0	0	0	0	0
k__Bacteria;p__Actinobacteria;c__Actinobacteria;o__Actinomycetales;f__Intrasporangiaceae;Other	0	0	0	0	0	0	0	0	0	0	0	0	0	0	0	0	0	0	0	0	0	0	0	0	0	0	0	0	0	0	0	0	0	0	0	0	0	0	0	0	0	0	0	0	0	0	0	0	0
k__Bacteria;p__Actinobacteria;c__Actinobacteria;o__Actinomycetales;f__Kineosporiaceae;g__Kineococcus	0	0	0	0	0	0	0	1.10948e-05	0	0	0	0	0	0	0	0	0	0	0	0	0	0	0	0	0	0	0	0	0	0	0	0	0	0	0	0	0	0	0	0	0	0	0	0	0	0	0	0	0
k__Bacteria;p__Actinobacteria;c__Actinobacteria;o__Actinomycetales;f__Microbacteriaceae;Other	0	0	0	0	0	0	0	3.69827e-06	0	0	0	0	0	0	0	0	0	0	0	0	0	0	0	0	0	0	0	0	0	0	0	0	0	0	0	0	0	0	0	0	0	0	0	0	0	0	0	0	0
k__Bacteria;p__Actinobacteria;c__Actinobacteria;o__Actinomycetales;f__Microbacteriaceae;g__	0	0	0	0	0	0	0	6.28705e-05	0	0	0	0	0	0	0	0	0	0	0	0	0	0	0	0	0	0	0	0	0	0	5.10984e-06	0	0	0	0	0	0	0	0	0	0	0	0	0	0	0	0	0	0
k__Bacteria;p__Actinobacteria;c__Actinobacteria;o__Actinomycetales;f__Micrococcaceae;g__Arthrobacter	0	5.60303e-06	0	0	0	0	0	0	0	0	0	0	0	0	0	0	0	0	0	0	0	0	4.52174e-06	4.3428e-06	0	0	0	0	0	0	0	2.62905e-05	0	1.92976e-05	0	0	0	0	0	0	0	0	0	0	0	0	0	0	0
k__Bacteria;p__Actinobacteria;c__Actinobacteria;o__Actinomycetales;f__Micrococcaceae;g__Kocuria	0	0	0	0	0	0	0	0	0	0	0	0	0	0	0	7.061e-06	0	0	0	0	0	0	0	0	0	0	0	0	0	0	0	0	0	0	0	0	0	0	0	0	0	0	0	0	0	0	0	0	0
k__Bacteria;p__Actinobacteria;c__Actinobacteria;o__Actinomycetales;f__Micrococcaceae;g__Micrococcus	0	0	0	0	0	0	0	0	0	0	0	0	0	0	0	0	0	0	0	0	0	0	0	0	0	0	0	0	0	5.16076e-06	0	0	0	0	0	0	0	0	0	0	0	0	0	0	0	0	0	0	0
k__Bacteria;p__Actinobacteria;c__Actinobacteria;o__Actinomycetales;f__Micrococcaceae;g__Rothia	2.13837e-05	1.12061e-05	0	0	9.56778e-06	1.17596e-05	0	1.84913e-05	9.38425e-06	4.94763e-06	1.3112e-05	0	0	5.93697e-06	0	7.061e-06	5.42017e-06	0.000123485	0	1.0852e-05	1.75989e-05	1.7378e-05	1.35652e-05	8.68561e-06	1.23898e-05	9.19591e-06	5.30051e-06	1.17174e-05	9.48546e-06	2.58038e-05	0	0	1.80535e-05	1.92976e-05	3.95538e-05	0	0	0	0	1.45311e-05	0	0	0	0	1.48326e-05	0	0	0	0
k__Bacteria;p__Actinobacteria;c__Actinobacteria;o__Actinomycetales;f__Nocardiaceae;g__Rhodococcus	0	0	0	0	0	0	0	1.10948e-05	0	0	0	0	0	0	0	0	0	0	0	0	0	0	0	0	0	0	0	0	0	0	0	0	0	0	0	0	0	0	0	0	0	0	0	0	0	0	0	0	0
k__Bacteria;p__Actinobacteria;c__Actinobacteria;o__Actinomycetales;f__Nocardioidaceae;g__	0	0	5.70103e-06	0	0	0	0	1.10948e-05	0	0	0	0	0	0	0	0	0	0	0	0	5.86631e-06	0	0	0	0	9.19591e-06	0	0	0	0	0	0	0	0	0	0	0	0	0	0	0	0	0	0	0	0	0	0	0
k__Bacteria;p__Actinobacteria;c__Actinobacteria;o__Actinomycetales;f__Nocardioidaceae;g__Aeromicrobium	0	0	0	0	0	0	0	3.69827e-06	0	0	0	0	0	0	0	0	0	0	0	0	0	0	0	0	0	0	0	0	0	0	0	0	0	0	0	0	0	0	0	0	0	0	0	0	0	0	0	0	0
k__Bacteria;p__Actinobacteria;c__Actinobacteria;o__Actinomycetales;f__Nocardioidaceae;g__Nocardioides	0	0	0	0	0	0	0	3.69827e-06	0	0	0	0	0	0	0	0	0	0	0	0	0	0	0	0	0	0	0	0	0	0	0	0	0	0	0	0	0	0	0	0	0	0	0	0	0	0	0	0	0
k__Bacteria;p__Actinobacteria;c__Actinobacteria;o__Actinomycetales;f__Propionibacteriaceae;g__Propionibacterium	0	0	0	0	0	0	0	0	0	0	0	0	0	0	0	0	0	0	0	0	0	0	0	0	0	0	0	0	0	0	0	0	0	0	0	0	0	0	0	0	0	0	0	0	0	0	0	0	0
k__Bacteria;p__Actinobacteria;c__Actinobacteria;o__Actinomycetales;f__Pseudonocardiaceae;g__Actinomycetospora	0	0	0	0	0	0	0	1.10948e-05	0	0	0	0	0	0	0	0	0	0	0	0	0	0	0	0	0	0	0	0	0	0	0	0	0	0	0	0	0	0	0	0	0	0	0	0	0	0	0	0	0
k__Bacteria;p__Actinobacteria;c__Actinobacteria;o__Actinomycetales;f__Sporichthyaceae;g__	0	0	0	0	0	0	0	3.69827e-06	0	0	0	0	0	0	0	0	0	0	0	0	0	0	0	0	0	0	0	0	0	1.03215e-05	0	0	0	0	0	0	0	0	0	0	0	0	0	0	0	0	0	0	0
k__Bacteria;p__Actinobacteria;c__Actinobacteria;o__Actinomycetales;f__Streptomycetaceae;g__Streptomyces	0	0	0	0	0	0	0	6.65688e-05	2.81528e-05	0	0	0	0	0	0	0	0	0	0	0	0	0	0	0	3.09746e-06	0	0	0	0	5.16076e-06	5.10984e-06	0	0	0	0	0	0	0	0	0	0	0	0	0	0	0	0	0	0
k__Bacteria;p__Actinobacteria;c__Actinobacteria;o__Actinomycetales;f__Williamsiaceae;g__Williamsia	0	0	0	0	0	0	0	2.95861e-05	0	0	0	0	0	0	0	0	0	0	0	0	0	0	0	0	0	0	0	0	0	5.16076e-06	0	0	0	0	0	0	0	0	0	0	0	0	0	0	0	0	0	0	0
k__Bacteria;p__Actinobacteria;c__Actinobacteria;o__Bifidobacteriales;f__Bifidobacteriaceae;Other	0	0	0	0	0	0	0	0	0	0	0	0	0	0	0	0	0	0	0	0	0	0	0	4.3428e-06	0	0	0	0	4.74273e-06	0	0	0	0	0	0	0	0	0	0	1.45311e-05	0	0	0	0	0	0	0	1.47962e-05	0
k__Bacteria;p__Actinobacteria;c__Actinobacteria;o__Bifidobacteriales;f__Bifidobacteriaceae;g__	0	5.60303e-06	0	1.06509e-05	0	3.91988e-06	4.71234e-06	0	9.38425e-06	4.94763e-06	0	0	5.22977e-06	0	0	0	0	7.2638e-06	2.87765e-05	5.42602e-06	5.86631e-06	0	9.04347e-06	4.3428e-06	0	0	1.59015e-05	0	4.74273e-06	1.03215e-05	5.10984e-06	2.62905e-05	0	0	5.93307e-05	1.57488e-05	0	4.64174e-05	1.40412e-05	0	0	1.24869e-05	0	0	0	0	0	0	0
k__Bacteria;p__Actinobacteria;c__Actinobacteria;o__Bifidobacteriales;f__Bifidobacteriaceae;g__Bifidobacterium	0.264228	0.253302	0.248086	0.0800631	0.0995527	0.0736506	0.231248	0.253997	0.213384	0.108403	0.0474951	0.161746	0.125384	0.247364	0.245143	0.0392874	0.0312364	0.0686792	0.282102	0.256391	0.206559	0.0326127	0.286149	0.252534	0.314566	0.120043	0.105252	0.109223	0.140138	0.187836	0.25682	0.268742	0.214295	0.268873	0.100902	0.187395	0.114346	0.192029	0.217863	0.204685	0.170355	0.0808651	0.0682409	0.070773	0.0489773	0.0602034	0.163119	0.178886	0.18414
k__Bacteria;p__Actinobacteria;c__Actinobacteria;o__Bifidobacteriales;f__Bifidobacteriaceae;g__Scardovia	0	0	0	0	0	0	0	0	0	0	0	0	0	0	0	0	0	0	0	0	0	0	0	4.3428e-06	0	0	0	0	0	0	0	0	0	0	0	0	0	0	0	0	0	0	0	0	0	0	0	0	0
k__Bacteria;p__Actinobacteria;c__Coriobacteriia;o__Coriobacteriales;f__Coriobacteriaceae;Other	6.05873e-05	7.84424e-05	0.000102618	1.59764e-05	3.34872e-05	2.35193e-05	5.18357e-05	4.43792e-05	2.34606e-05	9.89526e-06	3.60581e-05	1.09074e-05	4.18382e-05	6.53067e-05	6.96568e-05	6.3549e-05	0.000130084	0.000225178	6.90636e-05	5.42602e-05	3.51978e-05	0.000104268	7.68695e-05	9.11989e-05	4.95594e-05	2.29898e-05	8.48082e-05	7.61628e-05	1.89709e-05	7.22506e-05	4.08787e-05	3.94358e-05	0	1.92976e-05	0	3.14976e-05	0	1.54725e-05	2.80824e-05	0	3.2188e-05	0	1.1019e-05	0	2.96652e-05	0	0	0	3.71962e-05
k__Bacteria;p__Actinobacteria;c__Coriobacteriia;o__Coriobacteriales;f__Coriobacteriaceae;g__	0.00563818	0.00632021	0.00695525	0.0114125	0.011467	0.0112069	0.00386883	0.00394975	0.00349094	0.0109244	0.00888013	0.0114746	0.0116049	0.00738559	0.00923649	0.00509804	0.00461799	0.00891995	0.00230787	0.00276727	0.00279236	0.003632	0.00609982	0.00881589	0.00511081	0.0113753	0.0115286	0.0100183	0.00977477	0.0146411	0.0139192	0.0074928	0.00722139	0.00893477	0.0115497	0.019245	0.0146162	0.0060652	0.00509695	0.00725101	0.0173815	0.0126118	0.0123634	0.0111351	0.0116733	0.0118505	0.00889024	0.013938	0.00556083
k__Bacteria;p__Actinobacteria;c__Coriobacteriia;o__Coriobacteriales;f__Coriobacteriaceae;g__Adlercreutzia	0.000498954	0.000717187	0.000741133	0.0008574	0.000521444	0.00095645	0.000508932	0.000495568	0.000525518	0.000549187	0.00103913	0.000683532	0.000638032	0.00058776	0.000961264	0.000953235	0.000747984	0.0014455	0.000385605	0.000678253	0.000481037	0.000863108	0.000637565	0.000677477	0.000761976	0.000795446	0.00122972	0.000943247	0.000754094	0.000655416	0.000802244	0.000670409	0.000758246	0.000675415	0.000415315	0.000740192	0.000423951	0.000680788	0.000533565	0.00066843	0.000692042	0.00103641	0.000848466	0.000942845	0.0013201	0.00132655	0.000828013	0.000636236	0.000409158
k__Bacteria;p__Actinobacteria;c__Coriobacteriia;o__Coriobacteriales;f__Coriobacteriaceae;g__Atopobium	0	1.12061e-05	0	0	0	0	0	0	0	4.94763e-06	0	0	1.04595e-05	0	6.96568e-06	0	0	1.45276e-05	0	0	0	5.79267e-06	0	4.3428e-06	0	0	1.0601e-05	0	0	5.16076e-06	0	0	0	0	0	1.57488e-05	0	0	0	0	0	1.24869e-05	0	0	0	0	4.35796e-05	0	0
k__Bacteria;p__Actinobacteria;c__Coriobacteriia;o__Coriobacteriales;f__Coriobacteriaceae;g__Collinsella	0.0493323	0.0417201	0.0415263	0.0369321	0.0363575	0.0312257	0.046572	0.04182	0.0403992	0.0201467	0.0223003	0.0382087	0.0521565	0.0389287	0.0488294	0.0141361	0.0122929	0.0310092	0.00888042	0.0109443	0.00907518	0.012043	0.0320727	0.0405705	0.047131	0.0483521	0.0445349	0.0310627	0.0379276	0.0474583	0.0499691	0.0461662	0.0514885	0.0426476	0.0361918	0.0626329	0.0381758	0.0426266	0.0541709	0.0498707	0.0502132	0.0418685	0.0315475	0.029252	0.0366366	0.0397082	0.0442769	0.0478804	0.0494151
k__Bacteria;p__Actinobacteria;c__Coriobacteriia;o__Coriobacteriales;f__Coriobacteriaceae;g__Eggerthella	0.000110483	0.00012887	0.00010832	0.000404735	0.000243978	0.000270472	4.2411e-05	4.43792e-05	4.69213e-05	0.000192958	0.000219627	0.000258142	0.000355624	0.000160298	0.000243799	0.000275379	0.000119244	0.000101693	1.15106e-05	6.51123e-05	6.45294e-05	0.000191158	0.000158261	0.000117256	7.74365e-05	0.000285073	0.000201419	0.00013475	0.000327248	0.000289002	0.000265711	0.000157743	0.000162481	0.000154381	0.000474646	0.000188985	0.000262446	0.00012378	9.82884e-05	0.00013078	0.000498914	0.000274712	0.000275476	0.000346107	0.000326318	0.00028742	0.000174319	0.000266331	9.29904e-05
k__Bacteria;p__Actinobacteria;c__Coriobacteriia;o__Coriobacteriales;f__Coriobacteriaceae;g__Slackia	0.00132223	0.00142317	0.00134544	0.0016722	0.0012773	0.0013994	0.000909481	0.00109099	0.000858659	0.00105879	0.00146527	0.00157431	0.00146957	0.00105678	0.00158121	0.00114388	0.00112198	0.00179416	0.000235967	0.000320135	0.000328513	0.000793596	0.00141078	0.00133324	0.00123898	0.00192195	0.00171737	0.00139437	0.00159356	0.00128503	0.00128768	0.00122251	0.00124569	0.0015824	0.000909738	0.00124415	0.000706585	0.000866457	0.00117946	0.00101718	0.0013358	0.00167324	0.00158674	0.00133669	0.00167609	0.00161397	0.000849803	0.00112451	0.000799717
k__Bacteria;p__Actinobacteria;c__OPB41;o__;f__;g__	0	0	0	0	0	0	0	0	0	0	0	0	0	0	0	0	0	0	0	0	0	0	0	0	0	4.59795e-06	0	0	0	0	0	0	0	0	0	0	0	0	0	0	0	0	0	0	0	0	0	0	0
k__Bacteria;p__Actinobacteria;c__Thermoleophilia;o__Solirubrobacterales;f__;g__	0	0	0	0	0	0	0	0	0	4.94763e-06	0	0	0	0	0	0	0	0	0	0	0	0	0	0	0	0	0	0	0	0	0	0	0	0	0	0	0	0	0	0	0	0	0	0	0	0	0	0	0
k__Bacteria;p__Actinobacteria;c__Thermoleophilia;o__Solirubrobacterales;f__Patulibacteraceae;g__	0	0	0	0	0	0	0	1.47931e-05	0	0	0	0	0	0	0	0	0	0	0	0	0	0	0	0	0	0	0	0	0	5.16076e-06	0	0	0	0	0	0	0	0	0	0	0	0	0	0	0	0	0	0	0
k__Bacteria;p__Bacteroidetes;c__Bacteroidia;o__Bacteroidales;Other;Other	3.56396e-06	0	5.70103e-06	0	4.78389e-06	3.91988e-06	0	0	4.69213e-06	0	1.3112e-05	2.18149e-05	0	0	0	0	0	7.2638e-06	0	0	0	0	0	4.3428e-06	3.09746e-06	0	0	0	0	5.16076e-06	0	0	0	0	3.95538e-05	0	0	1.54725e-05	0	1.45311e-05	0	1.24869e-05	3.30571e-05	3.58042e-05	0	2.21092e-05	0	1.47962e-05	1.85981e-05
k__Bacteria;p__Bacteroidetes;c__Bacteroidia;o__Bacteroidales;f__;g__	0	2.24121e-05	0	5.32547e-06	0	0	0	7.39653e-06	0	0	0	1.8179e-05	0	5.93697e-06	0	7.061e-06	0	1.45276e-05	0	0	0	0	0	1.30284e-05	3.09746e-06	0	0	0	0	0	0	0	0	1.92976e-05	0	3.14976e-05	0	0	0	1.45311e-05	0	0	0	0	2.96652e-05	0	0	0	0
k__Bacteria;p__Bacteroidetes;c__Bacteroidia;o__Bacteroidales;f__Bacteroidaceae;g__5-7N15	0.000267297	0.000347388	0.000216639	0.00011716	9.56778e-05	0.000137196	0.000103671	0.000199706	0.000103227	5.44239e-05	8.19503e-05	3.27223e-05	0.000115055	9.49916e-05	0.000132348	0.000155342	0.000119244	0.00191764	3.45318e-05	9.76684e-05	2.93315e-05	0.000127439	0.000352695	0.000169369	0.000188945	0.000105753	6.36062e-05	7.61628e-05	7.58837e-05	6.70898e-05	2.04393e-05	0.00022347	0.000198588	0.000115785	0.000118661	0.000173237	8.07526e-05	3.09449e-05	0.000140412	0.000116249	0.000144846	9.98951e-05	9.91714e-05	0.000167086	0.000252154	0.000110546	0.000217898	0.000133166	0.000148785
k__Bacteria;p__Bacteroidetes;c__Bacteroidia;o__Bacteroidales;f__Bacteroidaceae;g__Bacteroides	0.189521	0.195198	0.183681	0.203337	0.157672	0.193368	0.226541	0.19265	0.235681	0.176185	0.221102	0.237157	0.179177	0.204475	0.189299	0.140013	0.124837	0.154407	0.175675	0.179298	0.226727	0.166105	0.16597	0.182337	0.159591	0.176847	0.157807	0.146279	0.153209	0.102513	0.15818	0.184809	0.225488	0.15604	0.151946	0.192828	0.129669	0.231066	0.224743	0.22404	0.135785	0.196856	0.176812	0.189536	0.194114	0.205947	0.215414	0.18877	0.190165
k__Bacteria;p__Bacteroidetes;c__Bacteroidia;o__Bacteroidales;f__Porphyromonadaceae;g__Parabacteroides	0.0158311	0.0175823	0.0204211	0.0264889	0.0204942	0.0244953	0.0156261	0.0163278	0.0185011	0.0188307	0.0303675	0.0205132	0.0178074	0.018464	0.0193785	0.0373456	0.0347541	0.0133581	0.010607	0.0180687	0.0193353	0.0455825	0.0157447	0.017267	0.0138302	0.0178125	0.0196702	0.0138323	0.0166612	0.0131806	0.0141031	0.0191658	0.01892	0.0201081	0.0191638	0.0227885	0.0176041	0.0194643	0.0208793	0.023395	0.0147099	0.0205784	0.0185671	0.0246214	0.0297394	0.0291842	0.0215937	0.0204039	0.0170916
k__Bacteria;p__Bacteroidetes;c__Bacteroidia;o__Bacteroidales;f__Porphyromonadaceae;g__Porphyromonas	0	0	0	0	0	0	0	7.39653e-06	0	0	0	0	0	0	0	0	0	7.2638e-06	0	0	0	0	0	0	0	0	0	0	0	0	0	0	0	0	0	0	0	0	0	0	0	0	0	0	0	0	0	0	0
k__Bacteria;p__Bacteroidetes;c__Bacteroidia;o__Bacteroidales;f__Prevotellaceae;g__Prevotella	0.0084644	0.00765373	0.00821518	0.0661423	0.0819528	0.0976912	0.00754916	0.012012	0.00526926	0.0942276	0.155519	0.00134888	0.02515	0.00107459	0.000877676	0.00098854	0.000422773	0.00504834	0.000546753	0.00050462	0.000357845	0.000417072	0.00770504	0.00546325	0.00587588	0.0559111	0.0866104	0.0940025	0.00953289	0.00413377	0.000495654	0.00768998	0.0057049	0.00704361	0.0670437	0.00171662	0.0730004	0.00434776	0.00332776	0.00302247	0.0193128	0.059088	0.0727257	0.044982	0.0588855	0.0541676	0.00346458	0.000902567	0.00496569
k__Bacteria;p__Bacteroidetes;c__Bacteroidia;o__Bacteroidales;f__RF16;g__	0	0	0	5.32547e-06	0	0	0	0	0	0	9.83403e-06	0	0	0	0	0	0	0	0	0	0	0	0	0	0	0	0	0	0	0	0	0	0	0	0	0	0	0	0	0	0	0	0	0	0	0	0	0	0
k__Bacteria;p__Bacteroidetes;c__Bacteroidia;o__Bacteroidales;f__Rikenellaceae;Other	0	1.12061e-05	1.71031e-05	1.59764e-05	9.56778e-06	3.91988e-06	4.71234e-06	3.69827e-06	4.69213e-06	0	3.27801e-06	3.63581e-06	1.04595e-05	0	0	0	5.42017e-06	0	0	5.42602e-06	5.86631e-06	0	4.52174e-06	0	3.09746e-06	0	0	0	0	5.16076e-06	0	0	0	0	0	1.57488e-05	0	1.54725e-05	0	2.90622e-05	0	1.24869e-05	0	0	0	0	0	1.47962e-05	5.57942e-05
k__Bacteria;p__Bacteroidetes;c__Bacteroidia;o__Bacteroidales;f__Rikenellaceae;g__	0.00443356	0.00527245	0.00450381	0.00472901	0.00311909	0.00528008	0.0039348	0.00422712	0.00383816	0.00401748	0.00522515	0.00592637	0.00357193	0.00393621	0.00376843	0.00288795	0.00350143	0.00896353	0.00235967	0.00288122	0.00293315	0.00428657	0.00414643	0.00489	0.00307888	0.00390826	0.00246474	0.00285318	0.00270336	0.00371058	0.00281041	0.00412761	0.00557852	0.00441914	0.0038565	0.00420492	0.00480478	0.00393	0.00329968	0.00351652	0.0040074	0.00292193	0.00352609	0.00341334	0.00489476	0.00342693	0.00647158	0.0034771	0.00461232
k__Bacteria;p__Bacteroidetes;c__Bacteroidia;o__Bacteroidales;f__Rikenellaceae;g__Alistipes	3.56396e-06	0	0	0	0	3.91988e-06	0	0	0	0	6.55602e-06	0	0	0	0	0	0	0	0	5.42602e-06	0	0	0	0	0	0	0	0	0	0	0	1.31453e-05	0	0	0	0	0	0	0	0	0	0	0	0	0	0	0	0	0
k__Bacteria;p__Bacteroidetes;c__Bacteroidia;o__Bacteroidales;f__S24-7;g__	0.000131866	0.000168091	0.000148227	9.58584e-05	0.000129165	8.23174e-05	5.6548e-05	0.000403111	0.000112611	5.44239e-05	8.52283e-05	8.36236e-05	8.36763e-05	0.00033247	0.000334353	0.000176525	0.000238488	0.00057384	0.000155393	0.000282153	0.000240519	0.000283841	0.000352695	0.000204112	0.000291161	0.000317259	0.000233223	0.000140608	0.000180224	0.00020127	0.000275931	0.000144598	0.000144428	0.000115785	7.91077e-05	0.000110241	0.000100941	1.54725e-05	0.00011233	5.81243e-05	4.8282e-05	4.99476e-05	5.50952e-05	2.38695e-05	0.000133494	0.000110546	8.71593e-05	7.39809e-05	0.000130187
k__Bacteria;p__Bacteroidetes;c__Bacteroidia;o__Bacteroidales;f__[Barnesiellaceae];Other	3.56396e-06	0	0	0	0	0	0	0	0	0	3.27801e-06	0	0	0	0	0	0	0	0	0	0	5.79267e-06	0	0	0	0	0	0	0	0	0	0	0	0	0	0	0	0	0	0	0	0	0	0	1.48326e-05	0	0	0	0
k__Bacteria;p__Bacteroidetes;c__Bacteroidia;o__Bacteroidales;f__[Barnesiellaceae];g__	0.00146479	0.00187141	0.00150507	0.00128344	0.00110029	0.00208537	0.00164461	0.001912	0.00201292	0.000920259	0.00166851	0.000963489	0.00128652	0.00119927	0.00132348	0.000586063	0.000807606	0.00265129	0.00068488	0.000775921	0.000797818	0.000897864	0.00116209	0.00149392	0.00108411	0.00110351	0.00109721	0.00108971	0.000958032	0.000578005	0.000700048	0.00120936	0.00167897	0.00104207	0.000870184	0.000818936	0.000908467	0.00126874	0.001362	0.00122061	0.000965639	0.00169822	0.00117904	0.00126508	0.00157226	0.00110546	0.00145992	0.00127247	0.00156224
k__Bacteria;p__Bacteroidetes;c__Bacteroidia;o__Bacteroidales;f__[Odoribacteraceae];g__Butyricimonas	0.000463314	0.000470654	0.000513092	0.000564499	0.000382711	0.000615421	0.000409973	0.000454887	0.000455136	0.000316648	0.000531038	0.000396303	0.000350395	0.000201857	0.000167176	0.000684917	0.000737143	0.000595632	2.30212e-05	3.79822e-05	9.38609e-05	0.000753047	0.000357217	0.000156341	0.000325233	0.00040462	0.00020672	0.000345662	0.000426846	0.000485111	0.000137966	0.00049952	0.000252749	0.000463142	0.000237323	0.000440966	0.000363387	0.000309449	0.000603771	0.00040687	0.000386256	0.000511962	0.000352609	0.000369977	0.000355983	0.000243201	0.000326847	0.000340312	0.000223177
k__Bacteria;p__Bacteroidetes;c__Bacteroidia;o__Bacteroidales;f__[Odoribacteraceae];g__Odoribacter	0.00208491	0.00228603	0.00230892	0.00127279	0.0013969	0.00177178	0.00203573	0.00240757	0.00246806	0.00126659	0.00175374	0.00169065	0.00137543	0.00078368	0.000501529	0.00165227	0.00210845	0.00334135	0.00029352	0.000482916	0.000774353	0.00164512	0.00212974	0.00194992	0.00168812	0.00127823	0.000922289	0.000890519	0.00106711	0.000562523	0.000235052	0.002353	0.00202199	0.00171748	0.00118661	0.000377971	0.00129204	0.00182575	0.00199385	0.00219419	0.00141627	0.00128615	0.00116802	0.00136056	0.00137943	0.00132655	0.00165603	0.000325516	0.00182261
k__Bacteria;p__Bacteroidetes;c__Bacteroidia;o__Bacteroidales;f__[Paraprevotellaceae];g__	3.20756e-05	3.36182e-05	6.27113e-05	5.32547e-06	4.78389e-06	0	9.42467e-06	2.95861e-05	4.22291e-05	0	0	0	0	1.18739e-05	1.39314e-05	7.061e-06	3.2521e-05	0.00127843	0	0	0	1.7378e-05	3.61739e-05	2.60568e-05	9.29238e-06	4.59795e-06	0	0	0	0	0	1.31453e-05	0	0.000135083	0	0	0	1.54725e-05	0	0	0	0	0	1.19347e-05	1.48326e-05	4.42184e-05	0	0	1.85981e-05
k__Bacteria;p__Bacteroidetes;c__Bacteroidia;o__Bacteroidales;f__[Paraprevotellaceae];g__Paraprevotella	0.0007021	0.000593921	0.000290752	0.00241776	0.00208099	0.00331622	0.0010697	0.00126481	0.0013091	0.00169704	0.00271092	5.45371e-05	0.00384388	0.000308723	0.000348284	0.000162403	7.04622e-05	0.0074236	1.72659e-05	4.34082e-05	0.00011146	3.4756e-05	0.00023513	0.000212797	0.000696929	0.00256566	0.00237463	0.00384329	0.0030638	0.00168241	4.59885e-05	0.00047323	0.000379123	0.000212273	0.00227435	0.000472463	0.00262446	0.000216614	0.000365071	0.000276091	0.00342802	0.00348384	0.0024903	0.00319851	0.00361916	0.00154765	0.000130739	0.000207147	0.000520746
k__Bacteria;p__Bacteroidetes;c__Bacteroidia;o__Bacteroidales;f__[Paraprevotellaceae];g__[Prevotella]	0	0	0	5.32547e-06	4.78389e-06	0	0	0.000188612	1.40764e-05	0	0	0	0.000109825	0.000160298	0.000250764	0.000233013	0.00030895	0.000232442	0.000207191	0.000200763	0.000146658	0.000185365	0.000113043	9.11989e-05	0.000269479	0.000165526	9.01087e-05	0.000117174	0.000142282	0.000129019	0.000189064	0	0	0	0	1.57488e-05	0	0	0	0	0	0	0	0	0	0	0	0	0
k__Bacteria;p__Bacteroidetes;c__Cytophagia;o__Cytophagales;f__Cytophagaceae;g__Hymenobacter	0	0	0	0	0	0	0	2.21896e-05	0	0	0	0	0	0	0	0	0	0	0	0	0	0	0	0	0	0	0	0	0	0	0	0	0	0	0	0	0	0	0	0	0	0	0	0	0	0	0	0	0
k__Bacteria;p__Bacteroidetes;c__Cytophagia;o__Cytophagales;f__Cytophagaceae;g__Spirosoma	0	0	0	0	0	0	0	3.69827e-06	0	0	0	0	0	0	0	0	0	0	0	0	0	0	0	0	0	0	0	0	0	0	0	0	0	0	0	0	0	0	0	0	0	0	0	0	0	0	0	0	0
k__Bacteria;p__Bacteroidetes;c__Flavobacteriia;o__Flavobacteriales;f__Flavobacteriaceae;g__	0	0	0	0	0	0	0	0	0	0	0	0	0	0	0	0	0	0	0	0	0	0	0	0	0	0	0	0	0	0	0	0	0	0	0	0	0	0	0	0	1.6094e-05	0	0	0	0	0	0	0	0
k__Bacteria;p__Bacteroidetes;c__Flavobacteriia;o__Flavobacteriales;f__Flavobacteriaceae;g__Flavobacterium	0	0	0	0	0	0	0	0	0	0	0	0	0	0	0	0	0	0	0	0	0	0	4.52174e-06	0	3.09746e-06	0	0	0	9.48546e-06	0	0	0	0	0	0	0	0	0	0	0	0	1.24869e-05	0	0	0	0	0	0	0
k__Bacteria;p__Bacteroidetes;c__Flavobacteriia;o__Flavobacteriales;f__Flavobacteriaceae;g__Polaribacter	0	0	0	0	0	0	0	0	0	0	0	0	0	0	0	0	0	0	0	0	0	0	0	0	0	0	0	0	0	0	0	0	0	1.92976e-05	0	0	0	0	0	0	0	0	0	0	0	0	0	0	0
k__Bacteria;p__Bacteroidetes;c__Flavobacteriia;o__Flavobacteriales;f__Flavobacteriaceae;g__Tenacibaculum	0	0	0	0	0	0	0	0	0	0	0	0	0	0	0	0	0	0	0	0	0	0	0	0	0	0	0	0	0	0	0	0	0	0	0	0	0	0	0	0	0	0	0	0	0	0	0	0	0
k__Bacteria;p__Bacteroidetes;c__Flavobacteriia;o__Flavobacteriales;f__[Weeksellaceae];g__Chryseobacterium	0	0	0	0	0	0	0	3.69827e-06	0	0	0	0	0	0	0	0	0	0	0	0	0	0	0	0	0	0	0	0	0	0	0	0	0	0	0	0	0	0	0	0	0	0	0	0	0	0	0	0	0
k__Bacteria;p__Bacteroidetes;c__Flavobacteriia;o__Flavobacteriales;f__[Weeksellaceae];g__Wautersiella	0	0	0	0	0	0	0	0	0	0	0	0	0	0	0	0	0	0	0	0	0	0	0	0	0	0	0	0	0	0	0	0	0	0	0	0	0	0	0	0	0	0	0	0	0	0	0	0	0
k__Bacteria;p__Bacteroidetes;c__Sphingobacteriia;o__Sphingobacteriales;f__;g__	0	0	0	0	0	0	0	3.69827e-06	0	0	0	0	0	0	0	0	0	0	0	0	0	0	0	0	0	0	0	0	0	0	0	0	0	0	0	0	0	0	0	0	0	0	0	0	0	0	0	0	0
k__Bacteria;p__Bacteroidetes;c__Sphingobacteriia;o__Sphingobacteriales;f__Sphingobacteriaceae;g__Olivibacter	0	0	0	0	0	0	0	3.69827e-06	0	0	0	0	0	0	0	0	0	0	0	0	0	0	0	0	0	0	0	0	0	0	0	0	0	0	0	0	0	0	0	0	0	0	0	0	0	0	0	0	0
k__Bacteria;p__Bacteroidetes;c__Sphingobacteriia;o__Sphingobacteriales;f__Sphingobacteriaceae;g__Pedobacter	0	0	0	0	0	0	0	1.47931e-05	0	0	0	0	0	0	0	0	0	0	0	0	0	0	0	0	0	0	0	0	0	0	0	0	0	0	0	0	0	0	0	0	0	0	0	0	0	0	0	0	0
k__Bacteria;p__Bacteroidetes;c__Sphingobacteriia;o__Sphingobacteriales;f__Sphingobacteriaceae;g__Sphingobacterium	0	0	0	0	0	0	0	1.10948e-05	0	0	0	0	0	0	0	0	0	0	0	0	0	0	0	0	3.09746e-06	0	0	0	0	0	0	0	1.80535e-05	0	0	0	0	0	0	0	0	0	0	0	0	0	0	0	0
k__Bacteria;p__Bacteroidetes;c__[Saprospirae];o__[Saprospirales];f__Chitinophagaceae;g__Flavisolibacter	0	0	0	0	0	0	0	0	0	0	0	0	0	0	0	0	0	0	0	0	0	0	0	4.3428e-06	3.09746e-06	0	0	1.17174e-05	0	0	0	0	0	0	0	0	0	0	0	0	0	0	0	0	0	0	0	0	0
k__Bacteria;p__Bacteroidetes;c__[Saprospirae];o__[Saprospirales];f__Saprospiraceae;g__	0	0	0	0	0	0	0	0	0	0	0	0	0	0	0	0	0	0	0	0	0	0	0	0	0	0	0	0	0	0	0	0	0	0	0	0	0	0	0	0	0	0	0	0	0	0	0	0	0
k__Bacteria;p__Cyanobacteria;c__4C0d-2;o__YS2;f__;g__	0	0	0	0	0	0	0	3.69827e-05	0	0	0	3.63581e-06	4.18382e-05	1.78109e-05	0	7.061e-06	5.96219e-05	0	0	0	5.86631e-06	5.79267e-06	2.71304e-05	0	2.16822e-05	0	1.59015e-05	5.85868e-06	0	1.03215e-05	0	0	0	0	0	0	0	0	0	0	0	0	0	0	0	0	0	0	1.85981e-05
k__Bacteria;p__Cyanobacteria;c__Chloroplast;o__Cryptophyta;f__;g__	0	0	0	0	0	0	0	0	0	0	0	0	0	0	0	0	0	0	0	0	0	0	0	0	0	0	0	0	0	0	0	0	0	0	0	0	0	0	0	0	0	0	0	0	0	0	0	0	0
k__Bacteria;p__Cyanobacteria;c__Chloroplast;o__Stramenopiles;f__;g__	0	0	0	0	0	0	0	0	0	0	0	0	0	0	0	0	0	0	0	0	0	0	0	0	0	0	0	0	0	0	0	0	0	0	0	0	0	0	0	0	0	0	0	0	0	0	0	0	0
k__Bacteria;p__Cyanobacteria;c__Chloroplast;o__Streptophyta;f__;g__	3.56396e-06	5.60303e-06	1.71031e-05	0	0	0	0	0.000181215	4.22291e-05	3.46334e-05	3.60581e-05	0.000101803	0	0	0	0	0	1.45276e-05	0	0	0	0	0	1.30284e-05	3.09746e-06	4.59795e-06	0	5.85868e-06	0	0	0	1.31453e-05	0	0	0	0	0	0	0	0	0	0	0	0	0	0	0	0	0
k__Bacteria;p__Firmicutes;Other;Other;Other;Other	0	5.60303e-06	0	5.32547e-06	0	0	4.71234e-06	0	4.69213e-06	0	0	0	0	0	0	0	0	0	0	0	0	0	0	0	0	0	0	0	0	0	0	1.31453e-05	0	0	0	0	0	0	1.40412e-05	0	0	0	1.1019e-05	0	0	0	0	0	0
k__Bacteria;p__Firmicutes;c__Bacilli;Other;Other;Other	0	0	0	0	0	0	0	0	0	0	0	3.63581e-06	0	0	0	0	0	0	0	0	0	0	0	0	0	0	0	0	0	0	0	0	0	1.92976e-05	0	0	0	0	0	0	0	0	0	1.19347e-05	0	2.21092e-05	0	0	0
k__Bacteria;p__Firmicutes;c__Bacilli;o__Bacillales;Other;Other	0.000292244	0.000313769	0.000296453	2.13019e-05	5.74067e-05	1.56795e-05	1.88493e-05	4.43792e-05	1.40764e-05	0	3.27801e-06	1.09074e-05	1.56893e-05	0	0	0	0	0	5.7553e-06	0	0	0	9.04347e-05	2.1714e-05	0.000123898	1.37939e-05	0	5.85868e-06	0	5.16076e-06	1.02197e-05	0.000420649	3.61069e-05	0.000906986	1.97769e-05	4.72463e-05	4.03763e-05	0	1.40412e-05	0	3.2188e-05	1.24869e-05	0	4.7739e-05	0	0	2.17898e-05	7.39809e-05	3.71962e-05
k__Bacteria;p__Firmicutes;c__Bacilli;o__Bacillales;f__;g__	0	0	5.70103e-06	0	0	0	0	0	0	0	0	0	0	0	0	0	0	0	0	0	0	0	0	0	0	0	0	0	0	0	0	2.62905e-05	0	0	0	3.14976e-05	0	0	0	0	0	0	0	1.19347e-05	0	0	0	0	0
k__Bacteria;p__Firmicutes;c__Bacilli;o__Bacillales;f__Bacillaceae;Other	0.000117611	0.000117664	9.12164e-05	0	6.69744e-05	0	0	0	0	0	0	0	1.04595e-05	0	0	0	0	0	0	0	0	0	8.13912e-05	1.30284e-05	4.64619e-05	0	0	0	0	0	0	0.000276051	0	0.000212273	0	0	0	0	0	1.45311e-05	0	0	0	0	0	2.21092e-05	0	0	0
k__Bacteria;p__Firmicutes;c__Bacilli;o__Bacillales;f__Bacillaceae;g__	0.000905245	0.000997339	0.000689824	0	0.000521444	7.83976e-06	9.42467e-06	2.95861e-05	4.69213e-06	0	9.83403e-06	7.27162e-06	5.75275e-05	0	0	0	0	7.2638e-06	5.7553e-06	5.42602e-06	0	5.79267e-06	0.000411478	6.51421e-05	0.000542056	4.59795e-06	0	0	4.74273e-06	1.03215e-05	5.10984e-06	0.00120936	1.80535e-05	0.00189116	1.97769e-05	4.72463e-05	0	0	1.40412e-05	1.45311e-05	0	0	1.1019e-05	0	1.48326e-05	0	0	1.47962e-05	1.85981e-05
k__Bacteria;p__Firmicutes;c__Bacilli;o__Bacillales;f__Bacillaceae;g__Anaerobacillus	0	0	0	5.32547e-06	0	0	0	0	0	0	0	0	0	0	0	0	0	0	0	0	0	0	0	0	0	0	0	0	0	0	0	0	0	0	0	0	0	0	0	0	0	0	0	0	0	0	0	0	0
k__Bacteria;p__Firmicutes;c__Bacilli;o__Bacillales;f__Bacillaceae;g__Bacillus	0.034492	0.0444264	0.0317718	2.66273e-05	0.0194178	1.56795e-05	2.35617e-05	0.00210431	3.28449e-05	9.89526e-06	1.63901e-05	7.27162e-06	0.00327907	1.78109e-05	6.96568e-06	2.8244e-05	5.42017e-06	1.45276e-05	5.7553e-06	1.62781e-05	0	0	0.0228755	0.00314853	0.0299091	4.59795e-06	0	1.7576e-05	1.89709e-05	1.03215e-05	0.000102197	0.0265797	0.000343016	0.0453493	7.91077e-05	0.000629951	0.000121129	9.28347e-05	5.61648e-05	8.71865e-05	6.4376e-05	2.49738e-05	1.1019e-05	3.58042e-05	2.96652e-05	4.42184e-05	2.17898e-05	5.91847e-05	0
k__Bacteria;p__Firmicutes;c__Bacilli;o__Bacillales;f__Bacillaceae;g__Salinibacillus	0	0	0	0	0	0	0	0	0	0	0	0	0	0	0	0	0	0	0	0	0	0	0	0	0	0	0	0	0	0	0	0	0	0	0	0	0	0	0	0	0	0	0	0	0	0	0	0	0
k__Bacteria;p__Firmicutes;c__Bacilli;o__Bacillales;f__Bacillaceae;g__Virgibacillus	0	0	0	0	0	0	0	0	0	0	0	0	0	0	0	0	0	0	0	0	0	0	0	0	3.09746e-06	0	0	0	0	0	0	0	0	0	0	0	0	0	0	0	0	0	0	0	0	0	0	0	0
k__Bacteria;p__Firmicutes;c__Bacilli;o__Bacillales;f__Paenibacillaceae;g__Brevibacillus	0	0	0	0	0	0	0	0	0	0	6.55602e-06	0	0	0	0	0	0	0	0	0	0	0	0	0	0	0	0	5.85868e-06	0	0	0	0	0	0	0	0	0	0	0	0	0	0	1.1019e-05	0	0	0	0	0	0
k__Bacteria;p__Firmicutes;c__Bacilli;o__Bacillales;f__Paenibacillaceae;g__Paenibacillus	0	0	0	0	0	0	0	0	0	0	0	0	0	0	0	0	0	0	0	0	0	0	0	4.3428e-06	3.09746e-06	0	0	0	0	0	0	0	0	0	0	0	0	0	0	0	0	0	0	0	0	0	0	0	0
k__Bacteria;p__Firmicutes;c__Bacilli;o__Bacillales;f__Planococcaceae;Other	1.06919e-05	2.80151e-05	2.28041e-05	0	0	0	0	0	0	0	0	0	0	0	0	0	0	0	0	0	0	0	4.52174e-06	0	3.09746e-06	0	0	0	0	0	0	1.31453e-05	0	0.000115785	0	0	0	0	0	0	0	0	0	0	0	0	0	0	0
k__Bacteria;p__Firmicutes;c__Bacilli;o__Bacillales;f__Planococcaceae;g__	0	5.60303e-06	0	0	0	0	0	0	0	0	0	0	0	0	0	0	0	0	0	0	0	0	4.52174e-06	0	0	0	0	0	0	0	0	0	0	3.85951e-05	0	0	0	0	0	0	0	0	0	0	0	0	0	0	0
k__Bacteria;p__Firmicutes;c__Bacilli;o__Bacillales;f__Staphylococcaceae;g__Staphylococcus	3.56396e-06	0	0	0	0	0	0	0	0	0	0	0	0	0	0	0	0	2.90552e-05	0	0	0	0	0	0	0	0	0	5.85868e-06	0	0	0	1.31453e-05	0	3.85951e-05	0	0	0	0	0	0	0	0	0	0	0	0	0	0	0
k__Bacteria;p__Firmicutes;c__Bacilli;o__Gemellales;f__Gemellaceae;g__	0	0	0	0	0	0	4.71234e-06	0	0	0	0	0	1.04595e-05	0	0	0	0	0	0	0	5.86631e-06	0	0	8.68561e-06	0	0	0	0	0	0	0	0	0	0	0	1.57488e-05	0	0	0	0	0	0	0	0	0	0	0	0	0
k__Bacteria;p__Firmicutes;c__Bacilli;o__Gemellales;f__Gemellaceae;g__Gemella	3.56396e-06	0	0	1.06509e-05	4.78389e-06	0	0	3.69827e-06	0	0	3.27801e-06	3.63581e-06	0	5.93697e-06	1.39314e-05	0	1.08403e-05	3.6319e-05	0	1.0852e-05	0	5.79267e-06	1.80869e-05	2.1714e-05	1.23898e-05	0	5.30051e-06	0	0	0	5.10984e-06	0	0	1.92976e-05	1.97769e-05	0	0	0	0	0	3.2188e-05	0	1.1019e-05	0	0	0	2.17898e-05	0	1.85981e-05
k__Bacteria;p__Firmicutes;c__Bacilli;o__Lactobacillales;Other;Other	1.06919e-05	3.92212e-05	1.14021e-05	1.59764e-05	0	7.83976e-06	0	3.69827e-06	9.38425e-06	9.89526e-06	1.63901e-05	0	5.22977e-06	0	0	2.8244e-05	4.33614e-05	0	5.7553e-06	0	0	4.05487e-05	4.52174e-06	4.3428e-06	6.19492e-06	4.59795e-06	1.0601e-05	0	1.89709e-05	0	5.10984e-06	1.31453e-05	0	7.71903e-05	3.95538e-05	0	2.01882e-05	0	2.80824e-05	1.45311e-05	0	0	5.50952e-05	3.58042e-05	4.44978e-05	2.21092e-05	2.17898e-05	0	0
k__Bacteria;p__Firmicutes;c__Bacilli;o__Lactobacillales;f__;g__	5.70233e-05	5.60303e-05	9.12164e-05	9.05329e-05	5.26228e-05	0.000129356	0.000108384	7.39653e-05	7.5074e-05	0.000118743	0.000167179	0.000152704	5.75275e-05	4.74958e-05	7.66225e-05	0.000289501	0.000135504	0.000188859	8.63294e-05	5.42602e-05	5.27968e-05	0.000266463	4.52174e-05	9.98845e-05	4.33645e-05	5.51755e-05	6.89067e-05	0.000105456	0.000109083	0.000113537	0.000107307	0.000170888	3.61069e-05	0.000115785	0.000217546	0.000204734	0.000141317	0.000154725	5.61648e-05	0.000116249	0.000273598	0.000174816	0.000297514	0.000190956	0.000296652	0.000132655	0.000152529	0.000221943	0.000278971
k__Bacteria;p__Firmicutes;c__Bacilli;o__Lactobacillales;f__Aerococcaceae;Other	3.56396e-06	0	0	0	0	0	0	0	0	0	0	0	0	0	0	0	0	0	0	0	0	0	0	0	3.09746e-06	0	0	0	0	0	0	0	0	0	0	0	0	0	0	0	0	0	0	0	0	0	0	0	0
k__Bacteria;p__Firmicutes;c__Bacilli;o__Lactobacillales;f__Aerococcaceae;g__Alkalibacterium	3.56396e-06	0	0	0	0	0	0	0	0	0	0	0	0	0	0	0	0	0	0	0	0	0	0	0	3.09746e-06	0	0	0	0	0	0	0	0	0	0	0	0	0	0	0	0	0	0	0	0	0	0	0	0
k__Bacteria;p__Firmicutes;c__Bacilli;o__Lactobacillales;f__Aerococcaceae;g__Facklamia	0	0	0	0	0	0	0	0	0	0	0	0	0	0	0	0	0	7.2638e-06	0	0	0	0	0	0	0	0	0	0	0	0	0	0	0	0	0	0	0	0	0	0	0	0	0	0	0	0	0	0	0
k__Bacteria;p__Firmicutes;c__Bacilli;o__Lactobacillales;f__Aerococcaceae;g__Marinilactibacillus	0	0	0	0	0	0	0	0	0	0	0	0	0	0	0	0	0	0	0	0	0	0	0	0	0	0	0	0	0	0	0	0	0	0	0	0	0	0	0	0	0	0	0	0	0	0	0	0	0
k__Bacteria;p__Firmicutes;c__Bacilli;o__Lactobacillales;f__Carnobacteriaceae;Other	0	0	0	5.32547e-06	9.56778e-06	0	0	0	0	0	0	0	0	0	0	0	0	0	0	0	0	0	4.52174e-06	0	0	0	1.0601e-05	5.85868e-06	0	5.16076e-06	0	0	0	0	0	0	0	0	0	0	0	0	0	2.38695e-05	0	2.21092e-05	0	0	0
k__Bacteria;p__Firmicutes;c__Bacilli;o__Lactobacillales;f__Carnobacteriaceae;g__Granulicatella	0	5.60303e-06	2.28041e-05	1.06509e-05	0	7.83976e-06	0	0	0	0	6.55602e-06	0	0	0	0	4.2366e-05	0	7.99018e-05	0	0	1.17326e-05	5.79267e-06	4.52174e-06	0	3.09746e-06	4.59795e-06	0	0	0	5.16076e-06	0	2.62905e-05	0	0	0	0	0	0	0	1.45311e-05	1.6094e-05	0	1.1019e-05	0	0	0	0	1.47962e-05	0
k__Bacteria;p__Firmicutes;c__Bacilli;o__Lactobacillales;f__Carnobacteriaceae;g__Trichococcus	0	0	0	5.32547e-06	0	0	0	0	0	0	0	0	0	0	0	0	0	0	0	0	0	0	0	0	0	0	0	0	0	0	0	0	0	0	0	0	0	0	0	0	0	0	0	0	0	0	0	0	0
k__Bacteria;p__Firmicutes;c__Bacilli;o__Lactobacillales;f__Enterococcaceae;Other	3.92035e-05	5.60303e-05	2.85051e-05	0.000138462	4.3055e-05	0.000113676	2.8274e-05	1.47931e-05	5.16134e-05	6.43192e-05	0.000154067	4.72655e-05	7.32168e-05	2.37479e-05	4.17941e-05	0.000162403	0.000216807	0	5.7553e-06	5.42602e-06	2.93315e-05	0.000249085	5.87826e-05	4.3428e-05	3.09746e-05	4.13816e-05	4.77046e-05	7.61628e-05	0.000137539	0.000113537	5.62082e-05	0.000105162	7.22139e-05	5.78927e-05	0.000177992	0.000204734	4.03763e-05	0.000139252	0.00011233	4.35932e-05	0.000193128	0.000262225	0.000165286	0.000358042	0.000207657	0.000198983	4.35796e-05	0.000118369	5.57942e-05
k__Bacteria;p__Firmicutes;c__Bacilli;o__Lactobacillales;f__Enterococcaceae;g__	0.00229162	0.00239249	0.00271939	0.00987874	0.0030569	0.0083415	0.00234203	0.000872791	0.00215838	0.00620927	0.0103815	0.00221421	0.00698174	0.00111021	0.00184591	0.0231389	0.0238921	0.000108957	0.0013007	0.00169292	0.00299182	0.0412496	0.00265426	0.00251448	0.00197928	0.00653369	0.00779175	0.00817285	0.0132749	0.00968674	0.00386304	0.00181405	0.00247333	0.00191046	0.00731746	0.00508685	0.00417895	0.00219709	0.00344009	0.0017292	0.00613181	0.0101269	0.00749295	0.0124718	0.0120144	0.0128676	0.0015035	0.00436487	0.00273392
k__Bacteria;p__Firmicutes;c__Bacilli;o__Lactobacillales;f__Enterococcaceae;g__Enterococcus	0.000138994	0.000201709	0.000182433	0.000532547	0.000200923	0.000415507	0.000164932	9.24566e-05	0.000173609	0.000371072	0.000475312	0.000541735	0.000319016	0.000302786	0.000202005	0.000720222	0.000720883	0	0.000310786	0.000325561	0.000305048	0.000978961	0.000113043	0.000225826	9.91188e-05	0.000239094	0.000275627	0.000351521	0.000502729	0.00047995	0.000347469	0.000210324	0.000288856	0.000250868	0.00083063	0.000440966	0.000706585	0.000448701	0.000491442	0.000377808	0.000756417	0.000986464	0.000837447	0.00150378	0.00130527	0.00134866	0.000370427	0.000547459	0.000539344
k__Bacteria;p__Firmicutes;c__Bacilli;o__Lactobacillales;f__Enterococcaceae;g__Vagococcus	0	0	0	0	0	0	0	0	0	0	0	0	0	0	0	0	0	0	0	0	0	0	0	0	0	0	0	0	0	0	0	0	0	0	0	0	0	0	0	0	0	0	0	0	0	0	0	0	0
k__Bacteria;p__Firmicutes;c__Bacilli;o__Lactobacillales;f__Lactobacillaceae;Other	2.49477e-05	1.12061e-05	2.28041e-05	5.32547e-06	1.43517e-05	7.83976e-06	1.88493e-05	2.21896e-05	1.87685e-05	1.97905e-05	1.3112e-05	2.90865e-05	5.22977e-06	1.78109e-05	2.78627e-05	0	0	0	0	5.42602e-06	0	5.79267e-06	2.71304e-05	2.1714e-05	6.19492e-06	4.59795e-06	0	1.17174e-05	4.74273e-06	1.03215e-05	0	3.94358e-05	7.22139e-05	5.78927e-05	3.95538e-05	4.72463e-05	0	1.54725e-05	5.61648e-05	0	1.6094e-05	3.74607e-05	9.91714e-05	7.16084e-05	0	2.21092e-05	0.000108949	4.43885e-05	7.43923e-05
k__Bacteria;p__Firmicutes;c__Bacilli;o__Lactobacillales;f__Lactobacillaceae;g__	0	0	5.70103e-06	0	0	0	0	0	0	0	3.27801e-06	1.8179e-05	0	1.78109e-05	6.96568e-06	0	0	0	0	0	0	0	2.26087e-05	0	3.09746e-06	0	0	0	0	0	1.02197e-05	0	0	3.85951e-05	0	0	0	0	0	0	1.6094e-05	0	0	0	0	0	0	0	0
k__Bacteria;p__Firmicutes;c__Bacilli;o__Lactobacillales;f__Lactobacillaceae;g__Lactobacillus	0.188836	0.157804	0.192404	0.0236823	0.0435717	0.0242248	0.221697	0.26862	0.21915	0.0441922	0.0160721	0.150621	0.0387735	0.105203	0.123508	0.00204769	0.00166399	0.00617423	0.0987033	0.112731	0.140557	0.00225914	0.188968	0.192616	0.182013	0.0258865	0.018997	0.0287251	0.0339959	0.0811994	0.0948641	0.168102	0.134354	0.18188	0.0504905	0.144794	0.0586264	0.167164	0.160898	0.149263	0.0990263	0.0231882	0.0156581	0.0203726	0.00956704	0.0164714	0.163838	0.149737	0.217077
k__Bacteria;p__Firmicutes;c__Bacilli;o__Lactobacillales;f__Lactobacillaceae;g__Pediococcus	3.56396e-06	0	0	0	0	0	4.71234e-06	3.69827e-06	4.69213e-06	0	0	0	0	0	0	0	0	0	0	0	0	0	0	0	3.09746e-06	0	0	0	0	0	0	2.62905e-05	0	0	0	1.57488e-05	0	0	1.40412e-05	0	1.6094e-05	0	0	0	0	0	2.17898e-05	0	0
k__Bacteria;p__Firmicutes;c__Bacilli;o__Lactobacillales;f__Leuconostocaceae;g__	0	0	0	0	0	0	0	0	0	0	0	0	0	0	0	0	0	7.2638e-06	0	0	0	0	0	0	0	0	0	0	0	0	0	0	0	0	0	0	0	0	0	0	0	0	0	0	0	0	0	0	0
k__Bacteria;p__Firmicutes;c__Bacilli;o__Lactobacillales;f__Leuconostocaceae;g__Leuconostoc	0	0	0	0	0	0	0	0	0	0	0	0	0	0	0	0	0	0	0	0	0	0	0	0	0	0	0	0	0	0	0	0	0	0	0	0	0	0	0	0	0	0	0	0	0	0	0	0	0
k__Bacteria;p__Firmicutes;c__Bacilli;o__Lactobacillales;f__Leuconostocaceae;g__Weissella	0	0	0	0	0	0	0	0	0	0	0	0	0	0	0	0	0	0	0	0	0	0	0	0	0	0	0	0	0	0	5.10984e-06	0	0	0	0	0	2.01882e-05	0	0	0	0	0	0	0	0	0	0	0	0
k__Bacteria;p__Firmicutes;c__Bacilli;o__Lactobacillales;f__Streptococcaceae;Other	0	5.60303e-06	0	1.06509e-05	0	3.91988e-06	4.71234e-06	0	0	0	1.3112e-05	3.63581e-06	0	0	6.96568e-06	2.8244e-05	1.08403e-05	0	0	0	0	0	0	0	3.09746e-06	0	5.30051e-06	0	4.74273e-06	0	0	0	0	1.92976e-05	0	1.57488e-05	0	0	2.80824e-05	0	0	4.99476e-05	2.20381e-05	1.19347e-05	7.41631e-05	2.21092e-05	0	1.47962e-05	1.85981e-05
k__Bacteria;p__Firmicutes;c__Bacilli;o__Lactobacillales;f__Streptococcaceae;g__	0	0	0	0	0	0	0	0	9.38425e-06	0	0	3.63581e-06	0	0	0	0	0	0	0	0	0	0	0	0	0	0	0	0	0	0	0	0	0	0	1.97769e-05	0	0	0	0	0	0	0	0	0	0	0	0	0	0
k__Bacteria;p__Firmicutes;c__Bacilli;o__Lactobacillales;f__Streptococcaceae;g__Lactococcus	1.78198e-05	1.68091e-05	0	4.79292e-05	2.87033e-05	1.17596e-05	9.42467e-06	3.69827e-06	9.38425e-06	1.97905e-05	5.90042e-05	2.90865e-05	2.09191e-05	5.93697e-06	0	0.000155342	5.42017e-05	0.000232442	3.45318e-05	1.0852e-05	1.17326e-05	0.000167987	0	8.68561e-06	0	4.59795e-06	2.12021e-05	0	3.31991e-05	0	4.59885e-05	0	3.61069e-05	0	3.95538e-05	0	2.01882e-05	1.54725e-05	1.40412e-05	0	0	4.99476e-05	1.1019e-05	2.38695e-05	0.000118661	4.42184e-05	0	2.95924e-05	1.85981e-05
k__Bacteria;p__Firmicutes;c__Bacilli;o__Lactobacillales;f__Streptococcaceae;g__Streptococcus	0.00432664	0.00564785	0.00691535	0.00819057	0.00334394	0.00907844	0.00469349	0.00216718	0.00533495	0.00767872	0.00733291	0.0163757	0.00717524	0.0128832	0.0146697	0.0160143	0.0103092	0.0174549	0.00711355	0.00790029	0.0107764	0.0152926	0.005928	0.00577593	0.00420635	0.00457497	0.00769634	0.00662031	0.00886891	0.0128038	0.0142411	0.00452197	0.00850319	0.0071208	0.00986868	0.0113706	0.00670247	0.0139407	0.0109802	0.0159551	0.0171562	0.0112132	0.00968574	0.0124479	0.0090034	0.0133761	0.0180202	0.0207147	0.0103033
k__Bacteria;p__Firmicutes;c__Bacilli;o__Turicibacterales;f__Turicibacteraceae;g__Turicibacter	0.000438367	0.000577112	0.000621412	0.000356806	0.000334872	0.000246952	0.000306302	0.000321749	0.000173609	0.000415601	0.000652324	0.00071989	0.00023011	0.000504643	0.000424906	0.00295856	0.00132794	0.00217188	0.000615817	0.000944128	0.000645294	0.00124542	0.000637565	0.000725248	0.00043984	0.000170124	0.000243824	0.000169902	0.000137539	0.000402539	0.000577411	0.000630973	0.000361069	0.0007912	0.000375761	0.000503961	0.000343199	0.000603426	0.000519524	0.000639368	0.000466726	0.000349633	0.000330571	0.000381912	0.000444978	0.000442184	0.000588325	0.000710217	0.000613737
k__Bacteria;p__Firmicutes;c__Clostridia;Other;Other;Other	0	0	0	0	0	0	0	0	0	0	0	0	0	0	0	0	0	0	0	0	0	0	0	0	0	0	0	0	0	0	0	0	0	0	0	0	0	0	0	0	0	0	0	0	0	0	0	0	0
k__Bacteria;p__Firmicutes;c__Clostridia;o__Clostridiales;Other;Other	0.000388471	0.000274548	0.000307855	0.00063373	0.00104289	0.000529183	0.000268603	0.000199706	0.000347217	0.00108353	0.000468756	0.000454476	0.000800155	0.000267164	0.000139314	0.000508392	0.000357731	0.001184	0.000299275	0.000249597	0.000275716	0.000167987	0.000334608	0.000338739	0.000291161	0.000441404	0.000349834	0.000462835	0.0005217	0.000237395	0.000194174	0.000617828	0.000505497	0.000675415	0.00114706	0.000787439	0.00195825	0.000603426	0.000379112	0.000377808	0.000675948	0.000998951	0.00104681	0.00124121	0.00100862	0.000707495	0.000762644	0.000547459	0.000539344
k__Bacteria;p__Firmicutes;c__Clostridia;o__Clostridiales;f__;g__	0.0119892	0.0134305	0.0127646	0.00659293	0.00530055	0.00737721	0.00714861	0.0106584	0.00766693	0.00304279	0.00605121	0.00641357	0.00594625	0.00829395	0.00935491	0.012738	0.00890534	0.0548272	0.00620996	0.00785146	0.00825976	0.00942467	0.0125162	0.0137493	0.0105128	0.00462094	0.00492418	0.00445259	0.00376573	0.00478918	0.00520181	0.0108054	0.00964056	0.0122733	0.00439048	0.00907129	0.00456252	0.0071328	0.00617813	0.00858787	0.00540758	0.00500724	0.00591722	0.00636122	0.00747564	0.00643378	0.00917351	0.00809351	0.00725325
k__Bacteria;p__Firmicutes;c__Clostridia;o__Clostridiales;f__Christensenellaceae;g__	0.000377779	0.000358594	0.000376268	8.52075e-05	6.69744e-05	0.000109757	0.000164932	0.000199706	0.000201761	5.44239e-05	6.55602e-05	0.000145432	0.000156893	0.000184046	0.000202005	0.000345989	0.000233067	0.00166341	0.000155393	0.000113947	0.000164257	0.000196951	0.000370782	0.000438623	0.000325233	8.73611e-05	9.54092e-05	4.10107e-05	9.95973e-05	7.22506e-05	0.000112416	0.000302341	0.000180535	0.000385951	0.000158215	0.000141739	6.05645e-05	0.000263032	0.0002387	0.000188904	0.000112658	7.49213e-05	0.00011019	8.35432e-05	0.000118661	6.63277e-05	0.000217898	0.000177554	0.000185981
k__Bacteria;p__Firmicutes;c__Clostridia;o__Clostridiales;f__Christensenellaceae;g__Christensenella	0	0	5.70103e-06	1.06509e-05	4.78389e-06	3.91988e-06	4.71234e-06	7.39653e-06	4.69213e-06	4.94763e-06	9.83403e-06	3.63581e-06	0	0	1.39314e-05	0	5.42017e-06	2.90552e-05	0	1.0852e-05	1.17326e-05	0	1.35652e-05	4.3428e-06	3.09746e-06	0	5.30051e-06	0	0	5.16076e-06	0	1.31453e-05	1.80535e-05	0	1.97769e-05	1.57488e-05	0	0	1.40412e-05	0	0	1.24869e-05	0	0	0	4.42184e-05	0	1.47962e-05	0
k__Bacteria;p__Firmicutes;c__Clostridia;o__Clostridiales;f__Clostridiaceae;Other	0.00757341	0.0074016	0.00904753	0.00437221	0.00506135	0.00479793	0.00360022	0.00522195	0.00305927	0.00640223	0.00738208	0.00984213	0.00482708	0.00853143	0.00541233	0.033342	0.0205316	0.0317791	0.0134904	0.0154316	0.0127475	0.0176387	0.00963582	0.0124638	0.00871626	0.00394505	0.00470686	0.00428269	0.00684376	0.00794241	0.00964737	0.00883362	0.00581322	0.00889618	0.00589352	0.00730743	0.00654096	0.0060652	0.00568668	0.00696039	0.00762855	0.00649318	0.00667754	0.00749502	0.00722348	0.00727393	0.00899919	0.00978028	0.00608157
k__Bacteria;p__Firmicutes;c__Clostridia;o__Clostridiales;f__Clostridiaceae;g__	0.000866042	0.000829248	0.000883659	0.00185326	0.00284641	0.00181098	0.000466521	0.000395714	0.000412907	0.00184052	0.00232083	0.00127253	0.00242661	0.000694626	0.000431872	0.00400359	0.00413017	0.00199754	0.0011971	0.00115032	0.0011146	0.00240396	0.000913391	0.00120296	0.000659759	0.00188516	0.00136223	0.00183377	0.00199669	0.0020643	0.000705157	0.00135396	0.000956834	0.00177538	0.00326319	0.00135439	0.00333105	0.00103665	0.00126371	0.00158389	0.0034924	0.00342141	0.00351507	0.00365203	0.00318901	0.00338271	0.00174319	0.00147962	0.00113448
k__Bacteria;p__Firmicutes;c__Clostridia;o__Clostridiales;f__Clostridiaceae;g__02d06	0	0	0	0	0	0	0	0	0	0	0	0	0	0	0	0	0	0	0	5.42602e-06	0	0	0	0	0	0	0	0	0	0	0	0	0	0	0	0	0	0	0	0	0	0	0	2.38695e-05	0	0	0	0	0
k__Bacteria;p__Firmicutes;c__Clostridia;o__Clostridiales;f__Clostridiaceae;g__Alkaliphilus	3.56396e-06	0	0	0	0	0	4.71234e-06	0	0	0	0	0	0	0	0	0	0	0	0	0	0	0	0	0	0	0	0	0	0	0	0	0	0	0	0	0	0	0	0	0	0	0	0	0	0	0	0	0	0
k__Bacteria;p__Firmicutes;c__Clostridia;o__Clostridiales;f__Clostridiaceae;g__Caldanaerocella	0	0	0	0	0	0	0	0	0	0	0	0	0	0	0	0	0	0	0	0	0	0	0	0	0	0	0	0	0	0	0	0	0	0	0	0	0	0	0	0	0	0	0	1.19347e-05	0	0	0	0	0
k__Bacteria;p__Firmicutes;c__Clostridia;o__Clostridiales;f__Clostridiaceae;g__Caloramator	0	0	0	0	0	0	0	0	0	0	0	0	0	0	0	0	0	0	0	0	0	0	0	0	0	0	0	0	0	0	0	0	0	3.85951e-05	0	0	0	0	0	0	0	0	0	0	0	0	0	0	0
k__Bacteria;p__Firmicutes;c__Clostridia;o__Clostridiales;f__Clostridiaceae;g__Clostridiisalibacter	0	0	0	0	0	0	0	0	0	0	0	0	0	0	0	0	0	0	0	0	0	0	0	0	0	0	0	0	0	0	0	0	0	0	0	0	0	0	0	0	0	0	0	0	0	0	0	0	0
k__Bacteria;p__Firmicutes;c__Clostridia;o__Clostridiales;f__Clostridiaceae;g__Clostridium	0.0049539	0.00758089	0.00839761	0.153586	0.175339	0.123445	0.00704965	0.00291054	0.00687866	0.163292	0.0910697	0.0169356	0.1666	0.0199245	0.0143075	0.281049	0.292104	0.00613791	0.0173868	0.0263868	0.0124248	0.263995	0.00560695	0.00636655	0.00442627	0.180525	0.160902	0.173317	0.160409	0.0560355	0.0193203	0.00487689	0.00667979	0.00432266	0.13213	0.02219	0.122017	0.00953103	0.00994117	0.0124095	0.0550414	0.164715	0.154443	0.168578	0.137854	0.156268	0.0120716	0.0151957	0.00807157
k__Bacteria;p__Firmicutes;c__Clostridia;o__Clostridiales;f__Clostridiaceae;g__Geosporobacter_Thermotalea	0	0	0	0	0	0	0	0	0	0	0	0	0	0	0	0	0	0	0	0	0	0	0	0	0	0	0	0	0	0	0	0	0	0	0	0	0	0	0	0	0	0	0	0	0	0	0	0	0
k__Bacteria;p__Firmicutes;c__Clostridia;o__Clostridiales;f__Clostridiaceae;g__SMB53	8.1971e-05	6.16333e-05	7.98144e-05	5.85801e-05	4.78389e-05	3.1359e-05	5.18357e-05	7.02671e-05	3.28449e-05	4.45287e-05	6.22822e-05	0.000101803	4.70679e-05	8.31176e-05	1.39314e-05	0.00014122	0.000130084	0.00072638	0.000103595	9.22424e-05	8.79946e-05	0.000115853	0.000135652	0.000143313	7.12416e-05	2.75877e-05	3.71036e-05	1.7576e-05	4.26846e-05	5.67683e-05	7.66475e-05	0.000236615	7.22139e-05	0.000135083	0.000158215	0.00012599	0.000100941	0.000201142	2.80824e-05	0.000203435	0.000144846	9.98951e-05	8.81523e-05	9.54779e-05	5.93305e-05	4.42184e-05	0.000130739	0.000147962	0.000204579
k__Bacteria;p__Firmicutes;c__Clostridia;o__Clostridiales;f__Clostridiaceae;g__Sarcina	3.56396e-06	0	0	0	0	0	0	0	0	0	3.27801e-06	0	0	0	0	0	5.42017e-06	0	0	0	0	0	0	0	0	0	0	0	0	0	0	0	0	0	0	0	0	0	0	0	0	1.24869e-05	2.20381e-05	1.19347e-05	0	2.21092e-05	0	0	0
k__Bacteria;p__Firmicutes;c__Clostridia;o__Clostridiales;f__Dehalobacteriaceae;g__	0	0	0	0	0	0	0	0	0	0	0	0	0	0	0	0	0	0	0	0	0	0	0	0	3.09746e-06	0	0	0	0	0	0	0	0	0	0	0	0	0	0	0	0	0	0	0	0	0	0	0	0
k__Bacteria;p__Firmicutes;c__Clostridia;o__Clostridiales;f__Dehalobacteriaceae;g__Dehalobacterium	3.56396e-06	0	0	0	0	7.83976e-06	4.71234e-06	7.39653e-06	1.40764e-05	0	0	7.27162e-06	0	5.93697e-06	0	0	0	0.000101693	0	0	0	0	0	4.3428e-06	0	0	0	0	0	5.16076e-06	0	0	0	0	1.97769e-05	0	0	0	0	0	0	0	0	0	0	2.21092e-05	0	0	0
k__Bacteria;p__Firmicutes;c__Clostridia;o__Clostridiales;f__EtOH8;g__	3.56396e-06	0	0	0	0	0	0	0	0	0	0	0	0	0	0	0	0	1.45276e-05	0	0	0	0	0	4.3428e-06	0	0	0	0	0	0	1.02197e-05	0	0	0	0	0	0	0	0	0	0	0	0	0	0	0	0	0	0
k__Bacteria;p__Firmicutes;c__Clostridia;o__Clostridiales;f__Eubacteriaceae;g__Anaerofustis	0	0	0	0	0	0	0	3.69827e-06	0	0	0	0	0	0	0	0	0	0	0	0	0	0	4.52174e-06	0	0	0	0	0	0	0	0	0	0	0	0	0	0	0	0	0	0	0	0	0	0	0	0	0	1.85981e-05
k__Bacteria;p__Firmicutes;c__Clostridia;o__Clostridiales;f__Eubacteriaceae;g__Pseudoramibacter_Eubacterium	0	0	0	2.13019e-05	4.78389e-06	1.56795e-05	4.71234e-06	0	4.69213e-06	1.48429e-05	0	3.63581e-06	0	0	6.96568e-06	7.061e-06	1.62605e-05	2.17914e-05	0	0	1.17326e-05	2.31707e-05	1.80869e-05	0	0	0	0	0	0	2.0643e-05	5.10984e-06	1.31453e-05	0	0	0	0	0	4.64174e-05	0	0	0	0	2.20381e-05	0	0	0	0	1.47962e-05	1.85981e-05
k__Bacteria;p__Firmicutes;c__Clostridia;o__Clostridiales;f__Lachnospiraceae;Other	0.00101929	0.000829248	0.000701226	0.00307279	0.00595116	0.00356709	0.000923618	0.000658291	0.000839891	0.00696626	0.00133743	0.000639902	0.00279793	0.000308723	0.000202005	0.000430721	0.000292689	0.0156971	0.000178414	0.000244171	0.000240519	0.000376523	0.000813912	0.000725248	0.000638077	0.00299327	0.00346123	0.00285318	0.000232394	0.000810239	0.000148185	0.00116993	0.00113737	0.00109996	0.00338185	0.000834685	0.00898373	0.000835512	0.00106713	0.00108983	0.00207612	0.00254733	0.00333877	0.0014441	0.00134977	0.00148132	0.000936962	0.000488274	0.00133906
k__Bacteria;p__Firmicutes;c__Clostridia;o__Clostridiales;f__Lachnospiraceae;g__	0.023597	0.0202886	0.0177359	0.0333001	0.0446337	0.0429736	0.0317423	0.02216	0.0326337	0.0560319	0.04148	0.0176591	0.0482708	0.0166057	0.00883248	0.00927109	0.00742564	0.112647	0.00362008	0.00401526	0.00406535	0.00591431	0.0233322	0.0179228	0.0231009	0.0283188	0.033107	0.043776	0.0312072	0.0358208	0.00577411	0.020993	0.0256179	0.0152644	0.0536548	0.0183631	0.0465337	0.0233634	0.028644	0.0216368	0.0388348	0.0386469	0.0492661	0.0451849	0.041828	0.0385364	0.0184778	0.0111415	0.0330302
k__Bacteria;p__Firmicutes;c__Clostridia;o__Clostridiales;f__Lachnospiraceae;g__Anaerostipes	4.27675e-05	5.04272e-05	2.28041e-05	0.000111835	1.43517e-05	0.000133276	6.59727e-05	5.17757e-05	2.34606e-05	1.48429e-05	0.000209793	1.09074e-05	6.7987e-05	0	0	2.8244e-05	5.42017e-06	0.000755435	0	5.42602e-06	1.75989e-05	0	6.33043e-05	3.47424e-05	5.88518e-05	2.29898e-05	5.30051e-05	4.10107e-05	5.217e-05	2.0643e-05	2.04393e-05	5.25811e-05	1.80535e-05	5.78927e-05	7.91077e-05	0	2.01882e-05	1.54725e-05	2.80824e-05	4.35932e-05	0	6.24344e-05	0.000132228	7.16084e-05	0.000163159	6.63277e-05	0.000130739	0	0
k__Bacteria;p__Firmicutes;c__Clostridia;o__Clostridiales;f__Lachnospiraceae;g__Blautia	0.0262058	0.0279479	0.0268689	0.0145066	0.0165618	0.0173494	0.0199238	0.0200742	0.0193034	0.015872	0.0202384	0.0147105	0.0160449	0.0150324	0.0137085	0.0168405	0.0122062	0.123717	0.0110732	0.0121326	0.0134162	0.0108265	0.0300062	0.0304431	0.0256718	0.0123041	0.0123873	0.0134457	0.0087456	0.00745213	0.00627488	0.0272239	0.0255276	0.0246623	0.0146349	0.0177331	0.0197844	0.0172054	0.0157402	0.0207359	0.0100105	0.0155087	0.018512	0.0156345	0.0184369	0.0160292	0.0208529	0.012562	0.0230244
k__Bacteria;p__Firmicutes;c__Clostridia;o__Clostridiales;f__Lachnospiraceae;g__Butyrivibrio	0	0	0	0	0	0	0	0	0	0	0	0	0	0	0	0	0	0	0	0	0	0	0	0	0	0	0	0	0	0	0	0	0	0	0	0	0	0	0	0	0	0	0	0	0	0	0	0	0
k__Bacteria;p__Firmicutes;c__Clostridia;o__Clostridiales;f__Lachnospiraceae;g__Clostridium	0	0	0	0	0	0	0	0	0	0	0	0	0	0	0	0	0	0	0	0	0	0	0	0	0	0	0	0	0	0	0	0	0	0	0	0	0	0	0	0	0	0	0	0	0	0	0	0	0
k__Bacteria;p__Firmicutes;c__Clostridia;o__Clostridiales;f__Lachnospiraceae;g__Coprococcus	0.00157883	0.00150161	0.00140815	0.00310475	0.00268376	0.00391204	0.00124877	0.00166792	0.00109327	0.00256782	0.0030256	0.00149795	0.00118716	0.000872735	0.000550289	0.00190647	0.00130626	0.0268252	0.000466179	0.000613141	0.000668759	0.00123963	0.00181774	0.00139838	0.00163856	0.00151733	0.00234283	0.0021267	0.000531186	0.000774114	0.000464995	0.00166945	0.0015526	0.001621	0.0020568	0.00157488	0.00466346	0.00103665	0.00126371	0.00133686	0.00223706	0.00249738	0.00233604	0.00205278	0.00225456	0.00221092	0.000915172	0.000769401	0.00150644
k__Bacteria;p__Firmicutes;c__Clostridia;o__Clostridiales;f__Lachnospiraceae;g__Dorea	0.00667886	0.00535089	0.00511382	0.0114018	0.0068888	0.0178433	0.0040479	0.00453038	0.00422291	0.0102169	0.00535627	0.00349765	0.0115787	0.00271913	0.00222902	0.00417305	0.00256916	0.0114332	0.00128919	0.00156812	0.00117326	0.0018189	0.00529495	0.0045556	0.00591615	0.00361859	0.0160553	0.00925671	0.00255633	0.00880425	0.00279508	0.00665151	0.00561463	0.00548051	0.0104224	0.00404744	0.0185731	0.00425492	0.00453531	0.00499869	0.0138247	0.00894061	0.0133441	0.00646863	0.0096412	0.00888791	0.00409649	0.00291485	0.00522606
k__Bacteria;p__Firmicutes;c__Clostridia;o__Clostridiales;f__Lachnospiraceae;g__Epulopiscium	0	0	0	5.32547e-06	0	3.91988e-06	0	0	0	4.94763e-06	3.27801e-06	7.27162e-06	0	1.18739e-05	0	0	0	0	0	0	0	5.79267e-06	0	4.3428e-06	0	0	0	0	0	0	0	1.31453e-05	0	0	0	0	2.01882e-05	0	4.21236e-05	0	1.6094e-05	0	1.1019e-05	0	1.48326e-05	0	2.17898e-05	0	0
k__Bacteria;p__Firmicutes;c__Clostridia;o__Clostridiales;f__Lachnospiraceae;g__Lachnobacterium	3.56396e-06	0	0	1.06509e-05	9.56778e-06	7.83976e-06	0	1.10948e-05	4.69213e-06	9.89526e-06	2.95021e-05	0	5.22977e-06	1.18739e-05	0	7.061e-06	0	5.08466e-05	5.7553e-06	5.42602e-06	0	0	0	8.68561e-06	3.09746e-06	4.59795e-06	0	1.17174e-05	1.42282e-05	5.16076e-06	5.10984e-06	1.31453e-05	0	0	1.97769e-05	0	0	0	0	0	0	0	3.30571e-05	2.38695e-05	0	0	0	1.47962e-05	0
k__Bacteria;p__Firmicutes;c__Clostridia;o__Clostridiales;f__Lachnospiraceae;g__Lachnospira	0.00397738	0.0042583	0.00406483	0.00284912	0.00280814	0.00306534	0.00222422	0.00327297	0.00183931	0.0037602	0.00412046	0.0044066	0.00363469	0.00294474	0.00267482	0.00208299	0.00157185	0.0124138	0.000823007	0.00156812	0.00158977	0.00144237	0.00417808	0.00515056	0.00371695	0.00276337	0.00228452	0.00226145	0.00213423	0.00246684	0.00211036	0.00408818	0.00341211	0.00362794	0.00318408	0.00414193	0.00329067	0.00278504	0.00247125	0.00293528	0.00280035	0.00263473	0.00331673	0.00266145	0.00229906	0.00252045	0.00291984	0.00359547	0.00234336
k__Bacteria;p__Firmicutes;c__Clostridia;o__Clostridiales;f__Lachnospiraceae;g__Moryella	0	0	0	0	0	0	0	0	0	0	0	0	0	0	0	0	0	0	0	0	5.86631e-06	0	0	0	0	0	0	0	0	0	0	0	0	0	0	0	0	0	0	0	0	0	0	0	0	0	0	0	0
k__Bacteria;p__Firmicutes;c__Clostridia;o__Clostridiales;f__Lachnospiraceae;g__Oribacterium	0	5.60303e-06	0	0	4.78389e-06	3.91988e-06	0	0	0	4.94763e-06	0	3.63581e-06	5.22977e-06	0	0	0	0	0	5.7553e-06	5.42602e-06	0	0	4.52174e-06	0	0	0	0	0	0	0	0	0	0	0	0	0	0	0	0	0	0	0	0	0	0	0	0	0	0
k__Bacteria;p__Firmicutes;c__Clostridia;o__Clostridiales;f__Lachnospiraceae;g__Pseudobutyrivibrio	3.56396e-06	5.60303e-06	0	0	4.78389e-06	0	4.71234e-06	7.39653e-06	0	0	6.55602e-06	0	0	0	0	0	0	0	0	0	0	0	0	0	3.09746e-06	0	0	0	0	0	0	1.31453e-05	0	1.92976e-05	0	0	2.01882e-05	1.54725e-05	0	0	1.6094e-05	1.24869e-05	0	0	1.48326e-05	0	0	0	0
k__Bacteria;p__Firmicutes;c__Clostridia;o__Clostridiales;f__Lachnospiraceae;g__Robinsoniella	0	0	0	0	0	0	0	0	0	0	0	0	0	0	0	0	0	0	0	0	0	0	0	0	0	0	0	0	0	0	0	0	0	0	0	0	0	0	0	0	0	0	0	0	0	0	0	0	0
k__Bacteria;p__Firmicutes;c__Clostridia;o__Clostridiales;f__Lachnospiraceae;g__Roseburia	0.00034214	0.000403418	0.000296453	0.00106509	0.000162652	0.00242248	0.000433535	0.000366128	0.000534902	0.000148429	0.00499897	9.81668e-05	0.000319016	0.000154361	7.66225e-05	9.8854e-05	7.58824e-05	0.002368	5.17977e-05	2.17041e-05	4.69305e-05	1.7378e-05	0.000316522	0.000230169	0.000470814	0.000165526	0.00138873	0.000556574	0.000128054	6.70898e-05	5.62082e-05	0.000302341	0.000523551	0.000270166	0.000375761	9.44927e-05	0.000282634	0.000216614	0.000336989	0.000217966	0.000128752	0.00124869	0.00232502	0.00192149	0.00384165	0.00172452	0.000239688	7.39809e-05	0.000260373
k__Bacteria;p__Firmicutes;c__Clostridia;o__Clostridiales;f__Lachnospiraceae;g__Shuttleworthia	0	0	0	0	0	0	0	0	0	0	0	0	0	0	0	0	0	0	0	0	0	0	0	0	0	0	0	0	0	0	0	0	0	0	0	0	0	0	0	0	0	0	0	0	0	0	0	0	0
k__Bacteria;p__Firmicutes;c__Clostridia;o__Clostridiales;f__Lachnospiraceae;g__[Ruminococcus]	0.00295452	0.00309287	0.00310706	0.000942607	0.000827613	0.00097605	0.00155507	0.00208952	0.00160471	0.00077183	0.000819503	0.00120345	0.000868142	0.00159111	0.00195736	0.0032763	0.00241198	0.0136051	0.00155969	0.00187198	0.00213534	0.00271097	0.00365356	0.0035003	0.00298595	0.000846024	0.000842781	0.000685465	0.000886891	0.000944419	0.00094532	0.00283938	0.00218447	0.00322269	0.00120639	0.00155913	0.000948843	0.00210425	0.0016709	0.00213607	0.00104611	0.000849108	0.00113496	0.00090704	0.00108278	0.00112757	0.0019175	0.00139084	0.00217598
k__Bacteria;p__Firmicutes;c__Clostridia;o__Clostridiales;f__Peptococcaceae;g__	3.56396e-06	0	0	0	0	0	0	0	0	0	0	3.63581e-06	0	0	0	0	0	0	0	0	0	0	0	0	3.09746e-06	0	0	0	0	0	0	0	0	0	0	0	0	0	0	0	0	0	0	0	0	0	0	0	0
k__Bacteria;p__Firmicutes;c__Clostridia;o__Clostridiales;f__Peptococcaceae;g__Desulfotomaculum	0	0	0	0	0	3.91988e-06	0	0	0	0	0	0	0	0	0	0	0	0	0	0	0	0	0	0	0	0	0	0	0	0	0	0	0	0	0	0	0	0	0	0	0	0	0	0	0	0	0	0	0
k__Bacteria;p__Firmicutes;c__Clostridia;o__Clostridiales;f__Peptococcaceae;g__Peptococcus	3.92035e-05	0.000100854	0.000182433	0.00011716	6.21905e-05	0.000109757	7.0685e-05	7.39653e-05	7.03819e-05	0.0001039	0.000137676	4.72655e-05	3.66084e-05	5.34328e-05	9.05538e-05	7.061e-05	0.000157185	0.000268761	5.7553e-06	4.88342e-05	8.21283e-05	0.000156402	9.04347e-05	0.000143313	9.60213e-05	2.75877e-05	6.89067e-05	0.000111315	4.26846e-05	5.16076e-05	3.57689e-05	0.000170888	7.22139e-05	0.000173678	9.88846e-05	4.72463e-05	0	0.000232087	2.80824e-05	8.71865e-05	0.000193128	7.49213e-05	0.000132228	0.000119347	0.000163159	0.000110546	2.17898e-05	0.000162758	1.85981e-05
k__Bacteria;p__Firmicutes;c__Clostridia;o__Clostridiales;f__Peptococcaceae;g__rc4-4	0	0	0	0	0	0	0	7.39653e-06	0	0	0	0	0	0	0	0	0	1.45276e-05	0	2.17041e-05	0	2.31707e-05	4.52174e-06	0	0	0	0	0	0	0	0	0	0	0	0	0	0	0	0	0	0	0	0	0	0	0	0	0	0
k__Bacteria;p__Firmicutes;c__Clostridia;o__Clostridiales;f__Peptostreptococcaceae;Other	0	5.60303e-06	5.70103e-06	0	4.78389e-06	3.91988e-06	4.71234e-06	0	4.69213e-06	4.94763e-06	0	3.63581e-06	0	5.93697e-06	6.96568e-06	1.4122e-05	0	2.17914e-05	1.72659e-05	0	5.86631e-06	0	4.52174e-06	4.3428e-06	6.19492e-06	0	0	5.85868e-06	4.74273e-06	0	1.02197e-05	0	0	0	5.93307e-05	0	0	0	0	0	1.6094e-05	1.24869e-05	0	2.38695e-05	0	2.21092e-05	0	1.47962e-05	0
k__Bacteria;p__Firmicutes;c__Clostridia;o__Clostridiales;f__Peptostreptococcaceae;g__	0.00142558	0.00151282	0.00157348	0.000495268	0.000889803	0.000525264	0.00172943	0.000713765	0.00177362	0.0120376	0.000871951	0.00235237	0.00495259	0.00150205	0.000891607	0.00375645	0.00215723	0.00513551	0.00441431	0.00817702	0.00289796	0.00186524	0.00162782	0.00158078	0.0010965	0.00560491	0.000349834	0.00152911	0.00813378	0.00386541	0.00147163	0.00166945	0.00247333	0.00173678	0.0100071	0.00119691	0.00944806	0.00374433	0.00366475	0.00367636	0.0101875	0.00129864	0.000771333	0.000835432	0.00100862	0.000729604	0.00294163	0.00204187	0.00375681
k__Bacteria;p__Firmicutes;c__Clostridia;o__Clostridiales;f__Peptostreptococcaceae;g__Clostridium	3.56396e-06	0	0	0	0	0	0	0	0	0	0	0	0	0	0	0	0	0	0	0	0	0	0	0	0	0	0	0	0	0	0	0	0	0	0	0	0	0	0	0	0	0	0	0	0	0	0	0	0
k__Bacteria;p__Firmicutes;c__Clostridia;o__Clostridiales;f__Peptostreptococcaceae;g__Peptostreptococcus	1.06919e-05	5.60303e-06	5.70103e-06	1.59764e-05	0	1.56795e-05	0	1.10948e-05	1.40764e-05	0	2.29461e-05	3.63581e-06	5.22977e-06	2.37479e-05	0	4.2366e-05	5.42017e-06	7.2638e-05	5.7553e-06	5.42602e-06	5.86631e-06	3.4756e-05	1.80869e-05	3.90852e-05	9.29238e-06	1.83918e-05	0	0	0	3.61253e-05	1.02197e-05	0	0	1.92976e-05	1.97769e-05	3.14976e-05	0	0	0	1.45311e-05	0	0	2.20381e-05	1.19347e-05	0	0	4.35796e-05	1.47962e-05	0
k__Bacteria;p__Firmicutes;c__Clostridia;o__Clostridiales;f__Peptostreptococcaceae;g__Tepidibacter	0	0	0	0	0	0	0	0	0	0	0	0	0	0	0	0	0	0	0	0	0	0	0	0	0	0	0	0	0	0	0	0	0	0	0	0	0	0	0	0	0	0	0	0	0	0	0	0	0
k__Bacteria;p__Firmicutes;c__Clostridia;o__Clostridiales;f__Peptostreptococcaceae;g__[Clostridium]	0	0	0	0	0	0	0	0	0	0	0	0	5.22977e-06	0	0	0	0	0	0	0	0	0	0	0	0	0	0	0	0	0	0	0	0	0	0	0	0	0	0	1.45311e-05	0	0	0	0	0	0	0	0	0
k__Bacteria;p__Firmicutes;c__Clostridia;o__Clostridiales;f__Ruminococcaceae;Other	1.06919e-05	2.24121e-05	1.71031e-05	0	0	7.83976e-06	1.4137e-05	2.95861e-05	1.87685e-05	0	0	1.09074e-05	5.22977e-06	1.78109e-05	6.96568e-06	1.4122e-05	0	5.08466e-05	0	0	1.17326e-05	5.79267e-06	9.04347e-06	1.30284e-05	2.47797e-05	4.59795e-06	0	5.85868e-06	0	0	5.10984e-06	9.20169e-05	3.61069e-05	7.71903e-05	1.97769e-05	3.14976e-05	0	0	1.40412e-05	5.81243e-05	0	1.24869e-05	1.1019e-05	1.19347e-05	1.48326e-05	0	2.17898e-05	0	1.85981e-05
k__Bacteria;p__Firmicutes;c__Clostridia;o__Clostridiales;f__Ruminococcaceae;g__	0.024823	0.0276285	0.0279578	0.0149007	0.0122994	0.015413	0.0118185	0.0205476	0.0123168	0.00941534	0.0115419	0.0141251	0.0109668	0.0156736	0.0185078	0.0141291	0.0102766	0.112705	0.00974947	0.0125667	0.0132168	0.0136186	0.0278132	0.0280632	0.0222707	0.0115317	0.0132778	0.00846579	0.00747929	0.0102647	0.0117475	0.024884	0.0225488	0.028599	0.011352	0.0171032	0.013304	0.0166019	0.0165686	0.0186434	0.0146938	0.0125993	0.0117904	0.0110993	0.0136757	0.0134424	0.017933	0.017637	0.0152504
k__Bacteria;p__Firmicutes;c__Clostridia;o__Clostridiales;f__Ruminococcaceae;g__Anaerotruncus	7.12791e-06	1.68091e-05	3.42062e-05	5.32547e-06	1.91356e-05	1.17596e-05	4.71234e-06	1.84913e-05	1.87685e-05	0	4.26141e-05	1.8179e-05	1.56893e-05	1.18739e-05	2.78627e-05	0	1.62605e-05	9.44294e-05	0	0	1.17326e-05	2.31707e-05	1.35652e-05	4.3428e-06	1.85848e-05	1.37939e-05	3.18031e-05	1.7576e-05	0	5.16076e-06	1.53295e-05	1.31453e-05	0	3.85951e-05	1.97769e-05	1.57488e-05	2.01882e-05	0	1.40412e-05	0	0	1.24869e-05	0	3.58042e-05	2.96652e-05	2.21092e-05	0	0	0
k__Bacteria;p__Firmicutes;c__Clostridia;o__Clostridiales;f__Ruminococcaceae;g__Faecalibacterium	0.000584489	0.000588318	0.000490288	0.000127811	0.000181788	0.000137196	0.000122521	0.000480775	0.000164224	9.89526e-05	0.000173735	0.000345402	8.36763e-05	0.000201857	0.000146279	0.000268318	0.000108403	0.00565124	0.000120861	4.88342e-05	0.000129059	6.37194e-05	0.000619478	0.000707877	0.000411962	0.00017932	0.000143114	7.61628e-05	0.000113826	0.000185787	0.000178844	0.000512665	0.00041523	0.000926283	0.000237323	0.000377971	0.000201882	0.000278504	0.000322948	0.000377808	0.000209222	0.000137356	0.000132228	0.000131282	0.000103828	0.000154765	0.000414006	0.000281127	0.000204579
k__Bacteria;p__Firmicutes;c__Clostridia;o__Clostridiales;f__Ruminococcaceae;g__Oscillospira	0.000691408	0.000784424	0.000769639	0.000553848	0.00032052	0.000795735	0.000386412	0.000721162	0.000365986	0.000128638	0.000753943	0.000138161	0.000350395	0.000302786	0.000320421	0.000557819	0.000981051	0.00593452	0.000212946	0.000217041	0.000164257	0.000700913	0.000750608	0.000985816	0.000941628	0.000331053	0.000524751	0.000292934	0.00031302	0.000247716	0.000235052	0.000538956	0.000433283	0.0007912	0.000316431	0.000204734	0.000242258	0.000464174	0.000336989	0.000435932	0.000177034	0.00039958	0.000363628	0.000525129	0.000815794	0.00055273	0.000326847	0.000281127	0.000520746
k__Bacteria;p__Firmicutes;c__Clostridia;o__Clostridiales;f__Ruminococcaceae;g__Ruminococcus	0.00662183	0.00637624	0.00614571	0.00354143	0.00334394	0.00370428	0.00557469	0.00758514	0.00580885	0.00132102	0.00257979	0.00209786	0.00339935	0.0039659	0.00369878	0.00823313	0.00545811	0.0566286	0.00132947	0.00206732	0.00181856	0.00554938	0.00696347	0.00655763	0.0100296	0.00254267	0.00367856	0.00248408	0.00278398	0.00292099	0.00308123	0.00617828	0.0051994	0.0063296	0.00284788	0.00483487	0.00218032	0.00337299	0.00438085	0.0038798	0.00300958	0.00297188	0.00366934	0.00377138	0.00673401	0.00448817	0.00435796	0.00406895	0.00537484
k__Bacteria;p__Firmicutes;c__Clostridia;o__Clostridiales;f__Veillonellaceae;Other	1.78198e-05	5.60303e-06	1.71031e-05	2.66273e-05	8.611e-05	6.2718e-05	4.71234e-06	3.69827e-06	9.38425e-06	8.90573e-05	5.57262e-05	2.54507e-05	2.61488e-05	0	6.96568e-06	7.061e-06	5.42017e-06	1.45276e-05	0	0	0	5.79267e-06	4.52174e-06	1.73712e-05	9.29238e-06	2.75877e-05	3.71036e-05	4.10107e-05	1.42282e-05	0	0	9.20169e-05	3.61069e-05	7.71903e-05	0.000138438	4.72463e-05	4.03763e-05	1.54725e-05	0	0	4.8282e-05	3.74607e-05	6.61142e-05	4.7739e-05	0.000118661	2.21092e-05	2.17898e-05	1.47962e-05	1.85981e-05
k__Bacteria;p__Firmicutes;c__Clostridia;o__Clostridiales;f__Veillonellaceae;g__	4.98954e-05	4.48242e-05	7.41133e-05	9.05329e-05	0.000114813	8.62373e-05	1.4137e-05	4.06809e-05	4.69213e-05	7.42144e-05	3.93361e-05	7.27162e-05	6.7987e-05	1.78109e-05	6.96568e-06	0	5.42017e-06	3.6319e-05	0	5.42602e-06	0	1.15853e-05	2.26087e-05	3.90852e-05	1.54873e-05	3.21857e-05	3.18031e-05	2.34347e-05	1.89709e-05	2.0643e-05	1.02197e-05	9.20169e-05	7.22139e-05	7.71903e-05	0.000296654	0.000204734	0.000343199	9.28347e-05	9.82884e-05	0.000101718	0.000209222	0.000124869	0.00011019	0.000179021	0.000163159	8.84369e-05	6.53694e-05	8.87771e-05	5.57942e-05
k__Bacteria;p__Firmicutes;c__Clostridia;o__Clostridiales;f__Veillonellaceae;g__Acidaminococcus	0.00013543	0.000274548	0.000376268	0.0120143	0.0452939	0.0174121	0.000183781	0.000240387	9.85346e-05	0.0246788	0.0103356	0.00370125	0.00573183	0.000860861	0.000842847	0.000190647	0.00102983	0.000399509	0.000454668	0.0007922	0.000393043	0.000810974	0.000149217	0.000486394	0.000235407	0.0131823	0.0120269	0.0127485	0.0079251	0.03467	0.0132038	0.000144598	0.000505497	0.000250868	0.00769322	0.00521284	0.0284249	0.000448701	0.000659936	0.00040687	0.0136799	0.00792917	0.00726155	0.0082111	0.00596271	0.0086447	0.000414006	0.00253015	0.000167383
k__Bacteria;p__Firmicutes;c__Clostridia;o__Clostridiales;f__Veillonellaceae;g__Dialister	0.000987216	0.00113741	0.0010889	0.000367457	0.000569283	0.000431187	0.000245041	0.000406809	0.000281528	0.000415601	0.000321245	0.000828964	0.00046545	0.000955853	0.000856779	0.000105915	0.000162605	0.0246243	0.000351073	0.00047749	0.000375444	0.000127439	0.00129774	0.00135061	0.000734098	0.000363238	0.000402839	0.000339803	0.000355705	0.000464468	0.00061829	0.000841297	0.000379123	0.00113856	0.000593307	0.000818936	0.000565268	0.000603426	0.000519524	0.000624837	0.000740323	0.000424554	0.000473819	0.000417716	0.00034115	0.000442184	0.000740854	0.00093216	0.000669531
k__Bacteria;p__Firmicutes;c__Clostridia;o__Clostridiales;f__Veillonellaceae;g__Megamonas	0	0	0	5.32547e-06	0	0	0	0	4.69213e-06	0	0	0	0	0	0	0	0	0	0	0	0	0	0	0	6.19492e-06	0	0	0	0	0	0	0	0	0	0	0	0	0	0	0	0	0	0	0	0	0	0	0	0
k__Bacteria;p__Firmicutes;c__Clostridia;o__Clostridiales;f__Veillonellaceae;g__Megasphaera	0	0	0	5.32547e-06	0	0	0	0	0	0	0	0	0	0	0	0	0	0	0	0	0	0	0	1.30284e-05	6.19492e-06	0	0	0	0	0	0	0	0	3.85951e-05	0	3.14976e-05	4.03763e-05	0	1.40412e-05	0	3.2188e-05	1.24869e-05	5.50952e-05	0	2.96652e-05	0	2.17898e-05	4.43885e-05	3.71962e-05
k__Bacteria;p__Firmicutes;c__Clostridia;o__Clostridiales;f__Veillonellaceae;g__Phascolarctobacterium	0.0146122	0.0235439	0.0218577	0.0602097	0.0339369	0.0597585	0.0105651	0.0131325	0.00933733	0.0329858	0.0594992	0.041321	0.0367234	0.0334073	0.0311157	0.0473369	0.0427652	0.00897806	0.0148659	0.0216553	0.0179802	0.0335222	0.0226403	0.0330053	0.0138271	0.0599343	0.0574576	0.0600163	0.0453879	0.0333849	0.0236892	0.0149462	0.023957	0.0180625	0.0431335	0.031781	0.034441	0.0176386	0.0180149	0.0161004	0.0290175	0.0474377	0.0544451	0.0349807	0.064596	0.052222	0.0276949	0.0276097	0.0141903
k__Bacteria;p__Firmicutes;c__Clostridia;o__Clostridiales;f__Veillonellaceae;g__Selenomonas	0	0	0	0	0	0	0	0	0	0	0	0	0	0	0	0	0	0	0	0	0	0	0	0	0	0	0	0	0	0	0	0	0	0	0	0	0	0	0	0	0	0	0	0	0	0	0	2.95924e-05	0
k__Bacteria;p__Firmicutes;c__Clostridia;o__Clostridiales;f__Veillonellaceae;g__Succiniclasticum	3.56396e-05	2.80151e-05	2.85051e-05	2.13019e-05	4.78389e-06	1.95994e-05	2.35617e-05	3.69827e-05	1.40764e-05	9.89526e-06	3.27801e-06	2.90865e-05	4.18382e-05	0.000142487	2.0897e-05	3.5305e-05	6.50421e-05	0.000196123	4.02871e-05	4.34082e-05	4.69305e-05	1.7378e-05	4.52174e-05	7.81705e-05	2.78772e-05	5.05775e-05	1.59015e-05	5.85868e-05	3.31991e-05	6.19291e-05	4.08787e-05	9.20169e-05	5.41604e-05	3.85951e-05	0	6.29951e-05	4.03763e-05	1.54725e-05	1.40412e-05	0	0	2.49738e-05	0	1.19347e-05	2.96652e-05	2.21092e-05	0	0	1.85981e-05
k__Bacteria;p__Firmicutes;c__Clostridia;o__Clostridiales;f__Veillonellaceae;g__Veillonella	0.00223816	0.00391091	0.00399072	0.0278362	0.0683235	0.019862	0.000805809	0.00113537	0.000619361	0.0130172	0.0128465	0.00544644	0.025924	0.004239	0.0042212	0.00944056	0.00841753	0.00214282	0.00554811	0.00877388	0.00517995	0.019753	0.00412834	0.00549365	0.00196999	0.0301856	0.0305734	0.0276412	0.0247286	0.0579863	0.0178691	0.0029051	0.0020942	0.00387881	0.0320584	0.00636251	0.0405782	0.00287788	0.00300482	0.00242669	0.0444838	0.0256606	0.0217406	0.0222225	0.0161082	0.0206721	0.00324668	0.00907006	0.00184121
k__Bacteria;p__Firmicutes;c__Clostridia;o__Clostridiales;f__[Acidaminobacteraceae];Other	0	0	0	0	0	0	0	0	0	0	0	0	0	0	0	0	0	0	0	0	0	0	0	0	0	0	0	0	0	0	0	0	0	0	0	0	0	0	0	0	0	0	0	0	0	0	0	0	0
k__Bacteria;p__Firmicutes;c__Clostridia;o__Clostridiales;f__[Mogibacteriaceae];g__	0.000384907	0.000341785	0.00038767	0.000101184	4.3055e-05	7.44777e-05	0.000183781	0.000273672	0.000281528	5.44239e-05	6.88382e-05	0.000105438	6.7987e-05	0.000142487	0.000125382	5.6488e-05	0.000124664	0.00109683	1.72659e-05	6.51123e-05	0.00011146	9.26827e-05	0.000379826	0.000416909	0.000331428	7.81652e-05	6.36062e-05	8.20215e-05	5.69128e-05	5.67683e-05	5.10984e-05	0.000341777	0.000126374	0.000289464	9.88846e-05	9.44927e-05	2.01882e-05	0.000170197	0.000322948	0.000174373	0.000128752	9.98951e-05	0.000176305	8.35432e-05	0.000118661	4.42184e-05	0.000217898	0.00019235	0.000260373
k__Bacteria;p__Firmicutes;c__Clostridia;o__Clostridiales;f__[Mogibacteriaceae];g__Anaerovorax	0	0	0	0	0	0	0	0	0	0	0	0	0	0	0	0	0	0	0	0	0	0	0	0	0	0	0	0	0	0	0	0	0	0	0	0	0	0	0	0	0	0	0	0	0	0	0	0	0
k__Bacteria;p__Firmicutes;c__Clostridia;o__Clostridiales;f__[Mogibacteriaceae];g__Mogibacterium	7.12791e-06	1.12061e-05	0	0	0	0	4.71234e-06	0	0	0	0	7.27162e-06	0	5.93697e-06	0	0	0	1.45276e-05	0	0	5.86631e-06	0	4.52174e-06	0	0	0	5.30051e-06	0	0	0	0	0	0	0	0	0	0	0	0	0	0	0	0	1.19347e-05	0	0	0	1.47962e-05	0
k__Bacteria;p__Firmicutes;c__Clostridia;o__Clostridiales;f__[Tissierellaceae];g__1-68	0	0	0	0	0	0	0	0	0	0	0	3.63581e-06	0	0	0	0	0	0	0	0	0	0	0	0	0	4.59795e-06	0	0	0	0	0	0	0	0	0	0	0	0	0	0	0	0	0	0	0	0	0	0	0
k__Bacteria;p__Firmicutes;c__Clostridia;o__Clostridiales;f__[Tissierellaceae];g__Anaerococcus	8.1971e-05	0.000117664	7.41133e-05	9.58584e-05	0	0.000184234	4.71234e-05	7.39653e-05	6.56898e-05	4.94763e-06	4.58922e-05	7.27162e-06	1.56893e-05	5.93697e-06	6.96568e-06	2.8244e-05	1.62605e-05	5.81104e-05	5.7553e-06	1.62781e-05	0	5.79267e-06	6.33043e-05	4.77708e-05	6.50467e-05	3.21857e-05	7.42072e-05	8.78802e-05	0	0	0	2.62905e-05	3.61069e-05	9.64878e-05	1.97769e-05	1.57488e-05	2.01882e-05	0.00012378	4.21236e-05	0.000232497	0	1.24869e-05	5.50952e-05	5.96737e-05	0.000148326	2.21092e-05	2.17898e-05	0	0.000130187
k__Bacteria;p__Firmicutes;c__Clostridia;o__Clostridiales;f__[Tissierellaceae];g__Finegoldia	1.06919e-05	0	0	2.13019e-05	0	2.35193e-05	9.42467e-06	0	0	9.89526e-06	6.55602e-06	1.45432e-05	0	5.93697e-06	0	2.8244e-05	2.16807e-05	0	0	5.42602e-06	5.86631e-06	3.4756e-05	4.52174e-06	1.30284e-05	1.54873e-05	0	5.30051e-06	0	0	5.16076e-06	0	0	3.61069e-05	1.92976e-05	0	3.14976e-05	2.01882e-05	1.54725e-05	1.40412e-05	2.90622e-05	1.6094e-05	2.49738e-05	3.30571e-05	2.38695e-05	0	2.21092e-05	0	0	0
k__Bacteria;p__Firmicutes;c__Clostridia;o__Clostridiales;f__[Tissierellaceae];g__Parvimonas	7.12791e-06	5.60303e-06	5.70103e-06	0	0	3.91988e-06	0	3.69827e-06	9.38425e-06	0	9.83403e-06	1.8179e-05	1.56893e-05	5.93697e-06	1.39314e-05	0	0	1.45276e-05	0	1.0852e-05	1.17326e-05	5.79267e-06	1.35652e-05	3.03996e-05	0	0	5.30051e-06	0	4.74273e-06	1.54823e-05	1.53295e-05	1.31453e-05	0	0	0	1.57488e-05	2.01882e-05	0	2.80824e-05	0	0	0	0	0	0	0	2.17898e-05	1.47962e-05	1.85981e-05
k__Bacteria;p__Firmicutes;c__Clostridia;o__Clostridiales;f__[Tissierellaceae];g__Peptoniphilus	0	0	0	0	4.78389e-06	7.83976e-06	0	1.84913e-05	4.69213e-06	9.89526e-06	3.27801e-06	7.27162e-06	0	0	2.0897e-05	7.061e-06	5.42017e-06	7.2638e-06	0	0	0	0	4.52174e-06	0	2.16822e-05	0	0	0	9.48546e-06	0	0	0	0	0	0	0	0	0	0	0	0	0	1.1019e-05	2.38695e-05	0	0	2.17898e-05	1.47962e-05	0
k__Bacteria;p__Firmicutes;c__Clostridia;o__Clostridiales;f__[Tissierellaceae];g__WAL_1855D	0	0	0	0	0	3.91988e-06	0	0	0	0	0	0	0	0	0	0	0	0	0	0	0	0	0	8.68561e-06	0	0	0	0	4.74273e-06	0	0	0	0	0	0	0	0	0	0	0	0	1.24869e-05	0	0	0	0	0	0	0
k__Bacteria;p__Firmicutes;c__Clostridia;o__Clostridiales;f__[Tissierellaceae];g__ph2	0	0	0	0	0	0	0	0	0	0	0	0	0	5.93697e-06	0	0	0	0	0	0	0	0	1.80869e-05	0	3.09746e-06	4.59795e-06	0	0	0	0	0	0	0	0	0	0	0	0	0	0	0	0	0	0	0	0	0	0	0
k__Bacteria;p__Firmicutes;c__Clostridia;o__SHA-98;f__;g__	0	0	0	0	0	0	0	0	0	0	0	0	0	0	0	0	0	7.2638e-06	0	0	0	0	0	4.3428e-06	0	0	0	0	0	0	0	0	0	1.92976e-05	0	1.57488e-05	0	0	0	0	0	0	0	0	0	0	0	0	0
k__Bacteria;p__Firmicutes;c__Erysipelotrichi;o__Erysipelotrichales;f__Erysipelotrichaceae;g__	0.000420547	0.000700378	0.000581505	0.000708287	0.000813261	0.00065462	0.000513645	0.00044749	0.000351909	0.00141007	0.000619544	0.000549007	0.000753087	0.000338407	0.000369181	0.000974418	0.000449874	0.00241158	0.000138127	0.000173633	0.00026985	0.000428657	0.000325565	0.000369138	0.000288064	0.000211506	0.000190818	0.000251923	0.000441074	0.000335449	0.000327029	0.000644118	0.000433283	0.00071401	0.0017997	0.000488212	0.00139298	0.00100571	0.000547607	0.000682961	0.00128752	0.000524449	0.000407705	0.000513194	0.000860292	0.000619058	0.00152529	0.000784198	0.000948502
k__Bacteria;p__Firmicutes;c__Erysipelotrichi;o__Erysipelotrichales;f__Erysipelotrichaceae;g__Bulleidia	3.56396e-05	8.40454e-05	7.41133e-05	9.58584e-05	0.000119597	7.83976e-05	5.18357e-05	7.02671e-05	2.81528e-05	9.4005e-05	0.000104896	7.6352e-05	5.22977e-06	1.18739e-05	2.0897e-05	2.8244e-05	4.33614e-05	0.000123485	0	2.71301e-05	1.17326e-05	2.31707e-05	5.87826e-05	5.64564e-05	4.0267e-05	1.37939e-05	2.12021e-05	4.10107e-05	1.42282e-05	2.0643e-05	1.02197e-05	9.20169e-05	1.80535e-05	3.85951e-05	1.97769e-05	0.000204734	0.000141317	3.09449e-05	5.61648e-05	4.35932e-05	0.000112658	8.74082e-05	4.40762e-05	4.7739e-05	0.000118661	6.63277e-05	8.71593e-05	0.000207147	0.000111588
k__Bacteria;p__Firmicutes;c__Erysipelotrichi;o__Erysipelotrichales;f__Erysipelotrichaceae;g__Catenibacterium	0.00178554	0.00216837	0.00237733	0.00219409	0.00254024	0.00161107	0.00155978	0.000728558	0.000825814	0.00368598	0.00124892	0.00327586	0.000815844	0.00117552	0.000738362	4.9427e-05	3.79412e-05	0.000145276	6.33083e-05	0.000162781	3.51978e-05	5.79267e-05	0.0015193	0.00169369	0.000650467	0.000813838	0.000869284	0.00103699	0.000782551	0.00126955	0.00092488	0.00199808	0.00229279	0.00214203	0.00288743	0.0076854	0.00320992	0.00280051	0.00193769	0.00188904	0.00656635	0.00118625	0.00120108	0.00103832	0.000875124	0.00128233	0.00372606	0.00513428	0.00213878
k__Bacteria;p__Firmicutes;c__Erysipelotrichi;o__Erysipelotrichales;f__Erysipelotrichaceae;g__Clostridium	0	0	0	0	9.56778e-06	0	0	0	0	0	0	0	0	0	0	0	5.42017e-06	1.45276e-05	0	0	0	0	0	0	0	0	0	0	0	0	0	0	0	0	0	0	0	0	0	0	0	0	0	0	0	0	0	2.95924e-05	0
k__Bacteria;p__Firmicutes;c__Erysipelotrichi;o__Erysipelotrichales;f__Erysipelotrichaceae;g__Coprobacillus	3.56396e-06	0	0	0	0	0	1.4137e-05	0	1.87685e-05	0	0	0	0	0	0	0	0	1.45276e-05	0	0	0	0	0	0	0	0	0	0	0	0	0	0	0	0	3.95538e-05	0	2.01882e-05	0	0	0	0	0	0	0	0	0	0	0	0
k__Bacteria;p__Firmicutes;c__Erysipelotrichi;o__Erysipelotrichales;f__Erysipelotrichaceae;g__Holdemania	3.56396e-06	1.12061e-05	0	0	0	7.83976e-06	0	0	0	0	0	0	0	0	0	0	0	4.35828e-05	0	0	0	5.79267e-06	4.52174e-06	0	0	0	0	0	0	0	0	0	0	0	0	0	0	0	0	0	0	0	0	0	0	0	0	0	0
k__Bacteria;p__Firmicutes;c__Erysipelotrichi;o__Erysipelotrichales;f__Erysipelotrichaceae;g__[Eubacterium]	0.00105493	0.00114302	0.000940669	0.00159764	0.00105246	0.00166595	0.0017954	0.000957851	0.00144048	0.000702563	0.00101946	0.00133071	0.000496828	0.000403714	0.000181108	0.000233013	6.50421e-05	0.000464883	2.87765e-05	8.68164e-05	4.10641e-05	0.000104268	0.000352695	0.000317025	0.000328331	0.000252888	0.000344533	0.000538998	0.000630783	0.000438664	0.000183954	0.000591537	0.00137206	0.000578927	0.00197769	0.000629951	0.000908467	0.0012378	0.00117946	0.000581243	0.000885169	0.000661805	0.000903561	0.000763823	0.00137943	0.00123812	0.00156887	0.000769401	0.00172962
k__Bacteria;p__Firmicutes;c__Erysipelotrichi;o__Erysipelotrichales;f__Erysipelotrichaceae;g__cc_115	0	5.60303e-06	0	0	4.78389e-06	0	0	3.69827e-06	0	0	0	3.63581e-06	0	0	0	0	0	1.45276e-05	0	0	0	1.7378e-05	0	0	3.09746e-06	0	0	0	0	0	0	0	1.80535e-05	0	0	0	0	0	0	0	0	0	0	0	0	0	0	0	0
k__Bacteria;p__Fusobacteria;c__Fusobacteriia;o__Fusobacteriales;f__Fusobacteriaceae;g__Fusobacterium	0	0	0	0	0	0	0	3.69827e-06	0	0	3.27801e-06	0	0	0	0	0	0	7.2638e-06	0	0	0	0	4.52174e-06	0	0	0	0	0	0	0	0	0	0	0	0	0	2.01882e-05	0	0	0	0	0	0	0	2.96652e-05	4.42184e-05	2.17898e-05	0	0
k__Bacteria;p__Fusobacteria;c__Fusobacteriia;o__Fusobacteriales;f__Leptotrichiaceae;g__Leptotrichia	0	0	0	0	0	0	0	0	0	0	0	0	0	0	0	0	0	0	0	0	0	0	0	0	0	0	0	0	0	0	0	0	0	0	0	0	0	0	0	0	0	0	0	0	0	0	0	0	0
k__Bacteria;p__Lentisphaerae;c__[Lentisphaeria];o__Victivallales;f__Victivallaceae;g__	0	0	0	0	0	0	0	0	0	0	0	0	0	5.93697e-06	0	0	0	0	0	1.62781e-05	0	0	4.52174e-06	0	0	0	0	0	0	0	0	0	0	0	0	0	0	0	0	0	0	0	1.1019e-05	0	0	0	0	0	0
k__Bacteria;p__OD1;c__ZB2;o__;f__;g__	0	0	0	0	0	0	0	0	0	0	0	0	0	0	0	0	0	0	0	0	0	0	0	0	3.09746e-06	0	0	0	0	0	0	0	0	0	0	0	0	0	0	0	0	0	0	0	0	0	0	0	0
k__Bacteria;p__Planctomycetes;c__Planctomycetia;o__Gemmatales;f__Gemmataceae;g__	0	0	0	0	0	0	0	0	0	0	0	0	0	0	0	0	0	0	0	0	0	0	0	0	0	0	0	0	0	0	0	0	0	0	0	0	0	0	0	0	0	0	0	0	0	0	0	0	0
k__Bacteria;p__Proteobacteria;Other;Other;Other;Other	0	0	0	5.32547e-06	0	3.91988e-06	0	3.69827e-06	4.69213e-06	1.48429e-05	3.27801e-06	0	0	0	6.96568e-06	0	5.42017e-06	0	0	0	0	0	0	0	0	0	0	0	0	0	0	0	0	0	0	0	2.01882e-05	0	0	0	1.6094e-05	0	1.1019e-05	2.38695e-05	2.96652e-05	2.21092e-05	0	0	0
k__Bacteria;p__Proteobacteria;c__Alphaproteobacteria;o__BD7-3;f__;g__	0	0	0	0	0	0	0	0	0	0	0	0	0	0	0	0	0	0	0	0	0	0	9.04347e-06	0	6.19492e-06	0	0	0	0	0	0	0	0	0	0	0	0	0	0	0	0	0	0	0	0	0	0	0	0
k__Bacteria;p__Proteobacteria;c__Alphaproteobacteria;o__Caulobacterales;f__Caulobacteraceae;g__	0	0	5.70103e-06	0	9.56778e-06	0	0	3.69827e-06	0	4.94763e-06	0	0	0	0	0	0	0	0	0	0	5.86631e-06	0	4.52174e-06	0	6.19492e-06	4.59795e-06	5.30051e-06	0	0	5.16076e-06	5.10984e-06	0	0	0	0	0	0	0	0	0	0	0	0	0	0	0	0	0	0
k__Bacteria;p__Proteobacteria;c__Alphaproteobacteria;o__Caulobacterales;f__Caulobacteraceae;g__Phenylobacterium	0	0	0	5.32547e-06	0	0	0	1.47931e-05	0	0	0	0	0	0	0	0	0	0	0	0	0	5.79267e-06	0	4.3428e-06	0	0	0	0	0	5.16076e-06	0	0	0	0	0	0	0	0	0	0	0	0	0	0	0	0	0	0	0
k__Bacteria;p__Proteobacteria;c__Alphaproteobacteria;o__RF32;f__;g__	1.06919e-05	2.24121e-05	5.70103e-06	1.59764e-05	4.78389e-06	1.17596e-05	1.4137e-05	4.80775e-05	3.7537e-05	9.89526e-06	1.96681e-05	1.45432e-05	3.13786e-05	5.34328e-05	7.66225e-05	8.4732e-05	5.96219e-05	7.99018e-05	5.17977e-05	3.25561e-05	8.79946e-05	5.2134e-05	3.61739e-05	5.64564e-05	3.40721e-05	3.21857e-05	2.12021e-05	5.85868e-05	1.89709e-05	6.70898e-05	1.02197e-05	1.31453e-05	0	0	3.95538e-05	3.14976e-05	0	4.64174e-05	2.80824e-05	1.45311e-05	1.6094e-05	0	2.20381e-05	1.19347e-05	1.48326e-05	0	0	2.95924e-05	1.85981e-05
k__Bacteria;p__Proteobacteria;c__Alphaproteobacteria;o__Rhizobiales;f__Aurantimonadaceae;g__	0	0	0	0	0	0	0	1.84913e-05	0	0	0	0	0	0	0	7.061e-06	0	0	0	0	0	0	1.35652e-05	0	0	0	0	5.85868e-06	0	0	0	0	0	0	0	0	0	0	0	0	0	0	0	0	0	0	0	0	0
k__Bacteria;p__Proteobacteria;c__Alphaproteobacteria;o__Rhizobiales;f__Beijerinckiaceae;g__	0	0	5.70103e-06	0	0	0	0	3.69827e-06	0	0	0	0	0	0	0	0	0	0	0	0	0	0	4.52174e-06	0	3.09746e-06	0	1.0601e-05	0	0	0	0	0	0	0	0	0	0	0	0	0	0	0	0	0	0	0	0	0	0
k__Bacteria;p__Proteobacteria;c__Alphaproteobacteria;o__Rhizobiales;f__Bradyrhizobiaceae;g__	0	0	0	0	0	0	0	0	0	0	3.27801e-06	0	0	0	0	0	0	0	0	0	5.86631e-06	0	0	0	0	0	0	0	0	5.16076e-06	0	0	0	0	0	0	0	0	0	0	0	0	0	0	0	0	0	0	0
k__Bacteria;p__Proteobacteria;c__Alphaproteobacteria;o__Rhizobiales;f__Bradyrhizobiaceae;g__Balneimonas	0	0	0	0	0	0	0	0	0	0	0	0	0	0	0	0	0	0	0	0	5.86631e-06	0	0	0	6.19492e-06	0	0	0	0	0	0	0	0	0	0	0	0	0	0	0	0	0	0	0	0	0	0	0	0
k__Bacteria;p__Proteobacteria;c__Alphaproteobacteria;o__Rhizobiales;f__Bradyrhizobiaceae;g__Bradyrhizobium	0	0	0	0	0	0	0	0	4.69213e-06	0	0	0	0	0	0	0	0	0	0	0	0	0	0	0	0	0	0	0	0	0	0	0	0	0	0	0	0	0	0	0	0	0	0	0	0	0	0	0	0
k__Bacteria;p__Proteobacteria;c__Alphaproteobacteria;o__Rhizobiales;f__Brucellaceae;g__Ochrobactrum	0	0	0	0	0	0	0	2.21896e-05	0	0	0	0	0	0	0	0	0	0	0	0	0	0	0	0	0	0	0	0	0	0	0	0	0	0	0	0	0	0	0	0	0	0	0	0	0	0	0	0	0
k__Bacteria;p__Proteobacteria;c__Alphaproteobacteria;o__Rhizobiales;f__Hyphomicrobiaceae;Other	0	0	0	1.06509e-05	9.56778e-06	0	0	0	0	0	0	0	0	0	0	0	0	0	0	0	0	0	2.26087e-05	2.60568e-05	6.19492e-06	9.19591e-06	0	2.34347e-05	0	1.03215e-05	1.02197e-05	0	0	0	0	0	0	0	0	0	0	0	0	0	0	0	0	0	0
k__Bacteria;p__Proteobacteria;c__Alphaproteobacteria;o__Rhizobiales;f__Hyphomicrobiaceae;g__Devosia	0	0	0	0	0	0	0	0	0	0	0	0	0	0	0	0	0	0	0	0	0	0	0	0	0	0	0	0	0	0	5.10984e-06	0	0	0	0	0	0	0	0	0	0	0	0	0	0	0	0	0	0
k__Bacteria;p__Proteobacteria;c__Alphaproteobacteria;o__Rhizobiales;f__Methylobacteriaceae;g__	0	0	0	0	0	0	0	0	0	0	0	0	0	0	0	0	0	0	0	0	0	0	0	0	0	0	0	5.85868e-06	0	0	0	0	0	0	0	0	0	0	0	0	0	0	0	0	0	0	0	0	0
k__Bacteria;p__Proteobacteria;c__Alphaproteobacteria;o__Rhizobiales;f__Methylobacteriaceae;g__Methylobacterium	0	0	0	0	0	0	0	5.91723e-05	0	0	0	0	0	0	0	0	0	0	0	0	0	0	0	0	0	0	0	0	4.74273e-06	0	0	0	0	0	0	0	0	0	0	0	0	0	0	0	0	0	0	0	0
k__Bacteria;p__Proteobacteria;c__Alphaproteobacteria;o__Rhizobiales;f__Methylocystaceae;g__Methylopila	0	0	0	0	0	0	0	3.69827e-06	0	0	0	0	0	0	0	0	0	0	0	0	0	0	0	0	0	0	0	0	0	0	0	0	0	0	0	0	0	0	0	0	0	0	0	0	0	0	0	0	0
k__Bacteria;p__Proteobacteria;c__Alphaproteobacteria;o__Rhizobiales;f__Methylocystaceae;g__Pleomorphomonas	0	0	0	0	0	0	0	0	0	0	0	0	0	0	0	0	0	0	0	0	0	0	4.52174e-06	0	0	0	0	0	0	0	0	0	0	0	0	0	0	0	0	0	0	0	0	0	0	0	0	0	0
k__Bacteria;p__Proteobacteria;c__Alphaproteobacteria;o__Rhizobiales;f__Rhizobiaceae;Other	0	0	0	0	0	0	0	1.47931e-05	4.69213e-06	0	0	0	0	0	0	0	0	0	0	0	0	0	0	0	0	0	0	5.85868e-06	0	0	0	0	0	0	0	0	0	0	0	0	0	0	0	0	0	0	0	0	0
k__Bacteria;p__Proteobacteria;c__Alphaproteobacteria;o__Rhizobiales;f__Rhizobiaceae;g__Agrobacterium	0	0	0	5.32547e-06	0	0	0	0.000177517	4.69213e-06	0	0	3.63581e-06	0	0	0	0	0	0	0	0	0	0	0	4.3428e-06	1.23898e-05	4.59795e-06	0	0	9.48546e-06	0	0	0	0	0	0	0	0	0	0	0	0	0	0	0	0	0	0	0	0
k__Bacteria;p__Proteobacteria;c__Alphaproteobacteria;o__Rhodobacterales;f__Rhodobacteraceae;g__	0	0	0	0	0	0	0	0	0	0	0	0	0	0	0	0	0	0	0	0	0	0	0	0	0	0	0	0	0	0	0	0	0	0	0	0	0	0	0	0	0	0	0	0	0	0	0	0	0
k__Bacteria;p__Proteobacteria;c__Alphaproteobacteria;o__Rhodobacterales;f__Rhodobacteraceae;g__Paracoccus	0	0	0	0	0	0	0	0	0	0	0	0	0	0	0	0	0	0	0	0	0	0	0	0	0	0	0	0	0	0	5.10984e-06	0	0	0	0	0	0	0	0	0	0	0	0	0	0	0	0	0	0
k__Bacteria;p__Proteobacteria;c__Alphaproteobacteria;o__Rhodospirillales;f__Acetobacteraceae;g__	0	0	0	0	0	0	0	1.84913e-05	0	0	0	0	0	0	0	0	0	0	0	0	0	0	0	0	0	0	0	0	0	0	0	0	0	0	0	0	0	0	0	0	0	0	0	0	0	0	0	0	0
k__Bacteria;p__Proteobacteria;c__Alphaproteobacteria;o__Rhodospirillales;f__Acetobacteraceae;g__Gluconobacter	0	0	0	0	0	0	0	0	4.69213e-06	0	0	0	0	0	0	0	0	0	0	0	0	0	0	0	0	0	0	0	0	0	0	0	0	0	0	0	0	0	0	0	0	0	0	0	0	0	0	0	0
k__Bacteria;p__Proteobacteria;c__Alphaproteobacteria;o__Rhodospirillales;f__Acetobacteraceae;g__Roseococcus	0	0	0	0	0	0	0	0	0	0	0	0	0	0	0	0	0	0	0	0	0	0	0	8.68561e-06	0	0	0	0	0	0	0	0	0	0	0	0	0	0	0	0	0	0	0	0	0	0	0	0	0
k__Bacteria;p__Proteobacteria;c__Alphaproteobacteria;o__Rhodospirillales;f__Rhodospirillaceae;Other	0	0	0	0	0	7.83976e-06	0	0	0	0	0	0	0	0	0	0	0	0	0	0	0	0	0	0	0	0	0	0	0	0	0	0	0	0	0	0	0	0	0	0	0	0	0	0	0	0	0	0	0
k__Bacteria;p__Proteobacteria;c__Alphaproteobacteria;o__Rhodospirillales;f__Rhodospirillaceae;g__Azospirillum	0	0	0	0	0	0	0	3.69827e-06	0	0	0	0	0	0	0	0	0	0	0	0	0	0	0	0	0	0	0	0	0	0	0	0	0	0	0	0	0	0	0	0	0	0	0	0	0	0	0	0	0
k__Bacteria;p__Proteobacteria;c__Alphaproteobacteria;o__Rickettsiales;f__Pelagibacteraceae;g__	0	0	0	0	0	0	0	0	0	0	0	0	0	0	0	0	0	0	0	0	0	0	0	0	0	0	0	0	0	0	0	0	0	1.92976e-05	0	0	0	0	0	1.45311e-05	0	0	0	0	0	0	0	0	0
k__Bacteria;p__Proteobacteria;c__Alphaproteobacteria;o__Rickettsiales;f__Rickettsiaceae;g__	0	0	0	0	0	0	0	7.39653e-06	0	0	0	0	0	0	0	0	0	0	0	0	0	0	0	0	0	0	0	0	0	0	0	0	0	0	0	0	0	0	0	0	0	0	0	0	0	0	0	0	0
k__Bacteria;p__Proteobacteria;c__Alphaproteobacteria;o__Rickettsiales;f__mitochondria;Other	0	0	0	0	0	0	0	1.10948e-05	0	0	0	1.09074e-05	0	0	0	0	0	0	0	0	0	0	0	0	0	0	0	0	0	0	0	0	0	0	0	0	0	0	0	0	0	0	0	0	0	0	0	0	0
k__Bacteria;p__Proteobacteria;c__Alphaproteobacteria;o__Sphingomonadales;f__Sphingomonadaceae;g__	0	0	5.70103e-06	0	0	0	0	0.000103551	9.38425e-06	0	0	0	0	0	0	0	0	0	0	0	0	0	9.04347e-06	0	3.09746e-06	4.59795e-06	0	0	0	0	5.10984e-06	0	0	0	0	0	0	0	0	0	0	0	0	0	0	0	0	0	0
k__Bacteria;p__Proteobacteria;c__Alphaproteobacteria;o__Sphingomonadales;f__Sphingomonadaceae;g__Kaistobacter	0	0	0	0	0	0	0	0	0	0	0	0	0	0	0	0	0	0	0	0	0	0	0	4.3428e-06	0	0	0	0	0	0	5.10984e-06	0	0	0	0	0	0	0	0	0	0	0	0	0	0	0	0	0	0
k__Bacteria;p__Proteobacteria;c__Alphaproteobacteria;o__Sphingomonadales;f__Sphingomonadaceae;g__Novosphingobium	0	0	0	0	0	0	0	0	0	0	0	0	0	0	0	0	0	0	0	0	0	0	0	0	0	0	0	0	4.74273e-06	0	0	0	0	0	0	0	0	0	0	0	0	0	0	0	0	0	0	0	0
k__Bacteria;p__Proteobacteria;c__Alphaproteobacteria;o__Sphingomonadales;f__Sphingomonadaceae;g__Sphingobium	0	0	0	0	0	0	0	1.84913e-05	0	0	0	0	0	0	0	0	0	0	0	0	0	0	0	0	0	0	0	0	0	0	0	0	0	0	0	0	0	0	0	0	0	0	0	0	0	0	0	0	0
k__Bacteria;p__Proteobacteria;c__Alphaproteobacteria;o__Sphingomonadales;f__Sphingomonadaceae;g__Sphingomonas	0	0	5.70103e-06	0	0	0	0	0.000125741	1.87685e-05	0	0	0	0	0	0	0	0	0	0	0	0	0	4.52174e-06	4.3428e-06	9.29238e-06	4.59795e-06	0	0	0	0	1.53295e-05	0	0	0	0	0	0	0	0	0	0	0	0	0	0	0	0	0	0
k__Bacteria;p__Proteobacteria;c__Betaproteobacteria;Other;Other;Other	0	0	2.28041e-05	2.13019e-05	4.78389e-06	2.74391e-05	0	0	0	1.97905e-05	4.58922e-05	1.09074e-05	1.04595e-05	5.93697e-06	6.96568e-06	1.4122e-05	0	1.45276e-05	1.15106e-05	0	0	0	0	0	3.09746e-06	4.59795e-06	0	5.85868e-06	0	0	0	0	3.61069e-05	0	0	0	6.05645e-05	3.09449e-05	0	0	0	0	6.61142e-05	3.58042e-05	2.96652e-05	6.63277e-05	2.17898e-05	0	0
k__Bacteria;p__Proteobacteria;c__Betaproteobacteria;o__;f__;g__	0	0	0	0	0	0	0	0	0	0	1.3112e-05	0	0	0	0	0	0	0	5.7553e-06	0	0	0	0	0	0	0	0	0	0	0	0	1.31453e-05	0	0	0	0	0	0	0	1.45311e-05	0	0	0	1.19347e-05	0	0	0	0	0
k__Bacteria;p__Proteobacteria;c__Betaproteobacteria;o__Burkholderiales;Other;Other	0	0	0	0	0	0	0	0	0	0	0	0	0	0	0	0	0	0	0	0	0	0	0	0	0	0	0	0	0	0	0	0	0	0	0	0	0	0	0	0	0	0	0	0	0	0	0	0	0
k__Bacteria;p__Proteobacteria;c__Betaproteobacteria;o__Burkholderiales;f__;g__	0	5.60303e-06	5.70103e-06	3.19528e-05	1.43517e-05	1.56795e-05	1.4137e-05	3.69827e-06	0	2.47381e-05	9.83403e-06	3.63581e-06	1.56893e-05	0	6.96568e-06	4.2366e-05	3.2521e-05	0	5.7553e-06	0	0	1.7378e-05	0	0	3.09746e-06	1.83918e-05	1.59015e-05	5.85868e-06	4.74273e-06	5.16076e-06	5.10984e-06	1.31453e-05	1.80535e-05	0	3.95538e-05	0	4.03763e-05	1.54725e-05	5.61648e-05	1.45311e-05	0.000112658	3.74607e-05	2.20381e-05	1.19347e-05	4.44978e-05	8.84369e-05	0	1.47962e-05	1.85981e-05
k__Bacteria;p__Proteobacteria;c__Betaproteobacteria;o__Burkholderiales;f__Alcaligenaceae;g__	0	0	0	0	0	0	0	7.39653e-06	0	0	0	0	0	0	0	0	0	0	0	0	0	0	0	0	0	0	0	0	0	0	0	0	0	0	0	0	0	0	0	0	0	0	0	0	0	0	0	0	0
k__Bacteria;p__Proteobacteria;c__Betaproteobacteria;o__Burkholderiales;f__Alcaligenaceae;g__Achromobacter	0	0	0	0	0	0	0	2.95861e-05	0	0	0	0	0	0	0	0	0	0	0	0	0	0	0	0	0	0	5.30051e-06	0	4.74273e-06	0	0	0	0	0	0	0	0	0	0	0	0	0	0	0	0	0	0	0	0
k__Bacteria;p__Proteobacteria;c__Betaproteobacteria;o__Burkholderiales;f__Alcaligenaceae;g__Pigmentiphaga	0	0	0	0	0	0	0	3.69827e-06	4.69213e-06	0	0	0	0	0	0	0	0	0	0	0	0	0	0	0	0	0	0	0	0	0	0	0	0	0	0	0	0	0	0	0	0	0	0	0	0	0	0	0	0
k__Bacteria;p__Proteobacteria;c__Betaproteobacteria;o__Burkholderiales;f__Alcaligenaceae;g__Sutterella	0.00271217	0.00156324	0.00161909	0.00334972	0.00203794	0.00774176	0.015447	0.0162391	0.0178348	0.00270635	0.0230182	0.00130889	0.00332613	0.000813365	0.000682637	0.00168758	0.00127916	0.0014237	0.000241722	0.000282153	0.000316781	0.00143658	0.00129322	0.00164592	0.00203503	0.00234955	0.00534822	0.00867084	0.00187812	0.000283842	0.000388348	0.00199808	0.00169703	0.00123504	0.00397516	0.00116541	0.0023822	0.00126874	0.00205001	0.00138045	0.0010622	0.00448279	0.00253438	0.00378331	0.0204245	0.00296264	0.00115486	0.000680624	0.0019714
k__Bacteria;p__Proteobacteria;c__Betaproteobacteria;o__Burkholderiales;f__Comamonadaceae;Other	0	0	0	0	0	0	0	7.39653e-06	0	0	0	0	0	0	0	0	0	0	0	0	0	0	4.52174e-06	4.3428e-06	0	0	0	0	0	0	0	0	0	0	0	0	0	0	0	0	0	0	0	0	0	0	0	0	0
k__Bacteria;p__Proteobacteria;c__Betaproteobacteria;o__Burkholderiales;f__Comamonadaceae;g__	7.12791e-06	5.60303e-06	1.14021e-05	0	9.56778e-06	0	0	2.58879e-05	0	0	0	0	0	0	0	7.061e-06	0	0	0	0	5.86631e-06	5.79267e-06	9.04347e-06	4.3428e-06	6.19492e-06	0	0	1.17174e-05	0	0	5.10984e-06	0	0	0	0	0	0	0	0	0	0	0	0	0	0	0	0	0	0
k__Bacteria;p__Proteobacteria;c__Betaproteobacteria;o__Burkholderiales;f__Comamonadaceae;g__Comamonas	3.56396e-06	0	0	0	0	0	0	0	0	0	0	0	0	0	0	0	0	0	5.7553e-06	0	0	0	0	0	0	0	0	0	0	0	0	0	0	0	0	0	0	0	0	0	0	0	0	0	0	0	0	0	0
k__Bacteria;p__Proteobacteria;c__Betaproteobacteria;o__Burkholderiales;f__Comamonadaceae;g__Delftia	0	0	0	0	0	0	0	1.10948e-05	0	0	0	0	0	0	0	0	0	0	0	0	0	0	0	0	0	0	0	0	0	0	0	0	0	0	0	0	0	0	0	0	0	0	0	0	0	0	0	0	0
k__Bacteria;p__Proteobacteria;c__Betaproteobacteria;o__Burkholderiales;f__Comamonadaceae;g__Limnobacter	0	0	0	0	0	0	0	0	0	0	0	0	0	0	0	0	0	0	0	0	0	0	0	0	0	0	0	0	0	0	0	0	0	0	0	0	0	0	0	0	0	0	0	0	0	0	0	0	0
k__Bacteria;p__Proteobacteria;c__Betaproteobacteria;o__Burkholderiales;f__Oxalobacteraceae;g__	0	0	2.28041e-05	1.59764e-05	1.43517e-05	0	0	2.58879e-05	0	0	0	0	0	0	0	0	0	0	0	0	1.17326e-05	0	1.35652e-05	2.1714e-05	3.09746e-06	0	0	0	4.74273e-06	5.16076e-06	5.10984e-06	0	0	0	0	0	0	0	0	0	0	0	0	0	0	0	0	0	0
k__Bacteria;p__Proteobacteria;c__Betaproteobacteria;o__Burkholderiales;f__Oxalobacteraceae;g__Collimonas	0	0	0	0	0	0	0	0	0	0	0	0	0	0	0	0	0	0	0	0	0	0	0	0	0	0	0	0	0	0	0	0	0	0	0	0	2.01882e-05	0	0	0	0	0	0	0	0	0	0	0	0
k__Bacteria;p__Proteobacteria;c__Betaproteobacteria;o__Burkholderiales;f__Oxalobacteraceae;g__Cupriavidus	0	0	0	5.32547e-06	0	3.91988e-06	2.8274e-05	1.47931e-05	1.87685e-05	0	0	0	0	0	0	0	0	0	0	0	0	0	0	0	0	0	0	0	0	0	0	0	0	0	0	0.000188985	4.03763e-05	0	0	0	0	0	0	0	0	0	0	0	0
k__Bacteria;p__Proteobacteria;c__Betaproteobacteria;o__Burkholderiales;f__Oxalobacteraceae;g__Janthinobacterium	0	0	0	0	0	0	0	3.69827e-06	0	0	0	0	0	0	0	0	0	0	0	0	0	0	0	0	0	0	0	0	0	0	0	0	0	0	0	0	0	0	0	0	0	0	0	0	0	0	0	0	0
k__Bacteria;p__Proteobacteria;c__Betaproteobacteria;o__Burkholderiales;f__Oxalobacteraceae;g__Oxalobacter	1.78198e-05	1.68091e-05	2.28041e-05	0	0	3.91988e-06	9.42467e-06	3.69827e-06	4.69213e-06	0	3.27801e-06	7.27162e-06	0	5.93697e-06	3.48284e-05	7.061e-06	5.42017e-06	0.000138012	5.7553e-06	1.0852e-05	5.86631e-06	5.79267e-06	2.71304e-05	1.30284e-05	9.29238e-06	0	0	0	9.48546e-06	5.16076e-06	5.10984e-06	0	0	0	0	0	0	0	0	0	0	0	0	0	0	0	0	0	0
k__Bacteria;p__Proteobacteria;c__Betaproteobacteria;o__Methylophilales;f__Methylophilaceae;g__	0	0	0	0	0	0	0	0	0	0	0	0	0	0	0	0	0	0	0	0	0	0	0	0	0	0	0	0	0	0	0	0	0	0	0	0	0	0	0	0	0	0	0	0	0	0	0	0	0
k__Bacteria;p__Proteobacteria;c__Betaproteobacteria;o__Neisseriales;f__Neisseriaceae;g__	0	0	0	0	0	0	0	0	0	0	0	0	0	0	0	0	0	0	0	0	0	0	0	0	6.19492e-06	0	0	0	0	0	0	0	0	0	0	0	0	0	0	0	0	0	0	0	0	0	0	0	0
k__Bacteria;p__Proteobacteria;c__Betaproteobacteria;o__Rhodocyclales;f__Rhodocyclaceae;g__	0	0	0	0	0	3.91988e-06	0	0	0	0	0	0	0	0	0	0	0	0	0	0	0	0	0	0	0	0	0	0	0	0	0	0	0	0	0	0	0	0	0	0	0	0	0	0	0	0	0	0	0
k__Bacteria;p__Proteobacteria;c__Deltaproteobacteria;o__Bdellovibrionales;f__Bdellovibrionaceae;g__Bdellovibrio	0	0	0	0	0	0	0	0	0	0	0	0	0	0	0	0	0	0	0	0	0	0	0	8.68561e-06	0	0	0	0	0	0	0	0	0	0	0	0	0	0	0	0	0	0	0	0	0	0	0	0	0
k__Bacteria;p__Proteobacteria;c__Deltaproteobacteria;o__Desulfovibrionales;f__Desulfovibrionaceae;g__	1.06919e-05	0	5.70103e-06	5.32547e-06	1.43517e-05	3.91988e-06	9.42467e-06	3.69827e-06	4.69213e-06	0	9.83403e-06	1.09074e-05	0	0	6.96568e-06	7.061e-06	5.42017e-06	1.45276e-05	5.7553e-06	0	0	1.15853e-05	4.52174e-06	4.3428e-06	0	9.19591e-06	0	0	4.74273e-06	0	1.53295e-05	0	5.41604e-05	0	0	0	0	0	0	1.45311e-05	1.6094e-05	0	0	0	0	0	2.17898e-05	0	0
k__Bacteria;p__Proteobacteria;c__Deltaproteobacteria;o__Desulfovibrionales;f__Desulfovibrionaceae;g__Bilophila	0.00032432	0.000268945	0.000319257	0.000170415	0.000200923	0.00031751	0.000245041	0.000399413	0.000328449	0.000311701	0.000383527	0.000469019	0.000303327	0.000284975	0.000362215	0.000360111	0.000818446	0.00101693	0.000431647	0.000347266	0.000305048	0.000816766	0.000248695	0.000473366	0.000405767	0.000211506	0.000212021	0.000251923	0.000331991	0.00034061	0.000347469	0.000394358	0.000397176	0.000385951	0.000177992	0.00051971	0.000383575	0.000278504	0.000308906	0.000363277	0.000370162	0.000349633	0.000275476	0.000346107	0.000400481	0.000309529	0.000414006	0.000488274	0.000223177
k__Bacteria;p__Proteobacteria;c__Deltaproteobacteria;o__Desulfovibrionales;f__Desulfovibrionaceae;g__Desulfovibrio	0.000231657	0.000190503	0.000188134	6.92311e-05	9.08939e-05	0.000188154	0.000179069	0.000288465	0.00015484	0.000113795	0.000239295	0.000149068	9.41359e-05	0.000112802	0.000132348	0.000473087	0.00063958	0.000370454	0.000143882	0.000168207	0.000134925	0.000324389	0.000122087	0.000173712	0.000223017	6.43714e-05	0.000111311	7.03041e-05	0.000118568	6.19291e-05	0.000122636	0.000131453	0.000252749	0.000192976	0.000118661	0.000110241	0.000141317	7.73623e-05	0.0002387	0.000290622	0.000144846	0.00016233	0.000154267	0.000131282	0.00028182	0.000110546	0.000174319	7.39809e-05	9.29904e-05
k__Bacteria;p__Proteobacteria;c__Deltaproteobacteria;o__MIZ46;f__;g__	0	0	0	0	0	0	0	3.69827e-06	0	0	0	0	0	0	0	0	0	0	0	0	0	0	0	0	0	0	0	0	0	0	0	0	0	0	0	0	0	0	0	0	0	0	0	0	0	0	0	0	0
k__Bacteria;p__Proteobacteria;c__Deltaproteobacteria;o__Syntrophobacterales;f__Syntrophobacteraceae;g__	0	0	0	0	0	0	0	0	0	0	0	0	0	0	0	0	0	0	0	0	0	0	0	0	0	0	0	0	0	0	0	0	0	0	0	0	0	0	0	0	0	0	0	0	0	0	0	0	0
k__Bacteria;p__Proteobacteria;c__Epsilonproteobacteria;o__Campylobacterales;f__Campylobacteraceae;g__Arcobacter	0	0	0	0	0	0	0	0	0	0	0	0	0	0	0	0	0	0	0	0	0	0	0	0	0	0	0	0	0	0	0	0	0	0	0	0	0	0	0	0	0	0	0	0	0	0	0	0	0
k__Bacteria;p__Proteobacteria;c__Epsilonproteobacteria;o__Campylobacterales;f__Campylobacteraceae;g__Campylobacter	0	5.60303e-06	1.14021e-05	0	4.78389e-06	7.83976e-06	0	3.69827e-06	0	0	3.27801e-06	0	0	1.78109e-05	1.39314e-05	0	0	0	0	0	0	0	0	0	3.09746e-06	0	0	0	0	1.03215e-05	1.02197e-05	0	0	0	0	0	0	0	0	0	0	0	0	1.19347e-05	0	0	2.17898e-05	0	1.85981e-05
k__Bacteria;p__Proteobacteria;c__Gammaproteobacteria;Other;Other;Other	0	0	0	0	0	0	0	0	0	0	0	3.63581e-06	0	5.93697e-06	0	0	0	0	0	5.42602e-06	0	0	0	0	3.09746e-06	0	0	0	0	0	0	0	0	0	0	0	0	0	0	0	0	0	0	0	0	0	0	0	0
k__Bacteria;p__Proteobacteria;c__Gammaproteobacteria;o__;f__;g__	0	0	0	0	0	0	0	0	0	0	0	0	0	0	0	0	0	0	0	0	0	0	0	0	0	0	0	0	0	0	0	0	0	0	0	0	0	0	0	0	0	0	0	0	0	0	0	0	0
k__Bacteria;p__Proteobacteria;c__Gammaproteobacteria;o__Aeromonadales;f__Aeromonadaceae;g__	0	0	0	0	0	0	0	3.69827e-06	0	0	0	0	0	0	0	0	0	0	0	0	0	0	0	0	0	0	0	0	0	0	0	0	0	0	0	0	0	0	0	0	0	0	0	0	0	0	0	0	0
k__Bacteria;p__Proteobacteria;c__Gammaproteobacteria;o__Aeromonadales;f__Succinivibrionaceae;g__Succinivibrio	0	0	0	0	0	0	0	0	0	0	0	0	0	0	0	0	0	0	5.7553e-06	0	0	0	1.80869e-05	0	0	0	0	0	0	0	0	0	0	0	0	0	0	0	0	0	0	0	0	0	0	0	0	0	0
k__Bacteria;p__Proteobacteria;c__Gammaproteobacteria;o__Alteromonadales;f__Colwelliaceae;g__	0	0	0	0	0	0	0	0	0	0	0	0	0	0	0	0	0	0	0	0	0	0	0	0	0	0	0	0	0	0	0	0	0	0	0	0	0	0	0	0	0	0	0	0	0	0	0	2.95924e-05	0
k__Bacteria;p__Proteobacteria;c__Gammaproteobacteria;o__Alteromonadales;f__Shewanellaceae;g__Shewanella	0	5.60303e-06	0	0	0	0	0	0	4.69213e-06	0	0	0	5.22977e-06	0	0	0	0	0	0	5.42602e-06	0	0	0	0	0	0	0	0	0	0	0	0	0	0	0	0	0	0	0	0	0	0	0	0	0	0	0	0	0
k__Bacteria;p__Proteobacteria;c__Gammaproteobacteria;o__Alteromonadales;f__[Chromatiaceae];g__Rheinheimera	0	0	0	0	4.78389e-06	0	0	0	0	0	0	0	0	0	0	0	0	0	0	0	0	0	0	8.68561e-06	3.09746e-06	0	0	0	1.42282e-05	1.54823e-05	0	0	0	0	0	0	0	0	0	0	0	0	0	0	0	0	0	0	0
k__Bacteria;p__Proteobacteria;c__Gammaproteobacteria;o__Cardiobacteriales;f__Cardiobacteriaceae;g__Cardiobacterium	0	0	0	0	0	0	0	0	0	0	0	7.27162e-06	0	0	0	0	0	7.2638e-06	0	0	0	0	0	0	0	0	0	0	0	0	0	0	0	0	0	0	0	0	0	0	0	0	0	0	0	0	0	0	0
k__Bacteria;p__Proteobacteria;c__Gammaproteobacteria;o__Chromatiales;f__Chromatiaceae;g__	0	0	0	0	0	0	0	0	0	0	0	0	0	0	0	0	0	0	0	0	0	0	0	0	0	0	0	0	0	0	5.10984e-06	0	0	0	0	0	0	0	0	0	0	0	0	0	0	0	0	0	0
k__Bacteria;p__Proteobacteria;c__Gammaproteobacteria;o__Enterobacteriales;f__Enterobacteriaceae;Other	8.90989e-05	0.000112061	7.41133e-05	0.000250297	0.000105246	0.000211673	0.000146082	4.80775e-05	0.000197069	0.000143481	0.000245851	0.000345402	0.00023534	0.000296849	0.000243799	0.000268318	0.000466135	2.17914e-05	0.000356828	0.000265875	0.000357845	0.000492377	0.000185391	0.000160684	0.000114606	0.000216104	0.000159015	0.000181619	0.000294049	0.000258038	0.00031681	0.000131453	0.00041523	0.000173678	0.000415315	0.000425217	0.000282634	0.000433229	0.000393154	0.000276091	0.00024141	0.000374607	0.000407705	0.000656411	0.000266987	0.000508512	0.000479376	0.000443885	0.00039056
k__Bacteria;p__Proteobacteria;c__Gammaproteobacteria;o__Enterobacteriales;f__Enterobacteriaceae;g__	0.0550239	0.0688108	0.0655333	0.133659	0.0528189	0.131716	0.0806563	0.0356032	0.095222	0.111658	0.131094	0.166076	0.143861	0.198414	0.203168	0.238824	0.304077	0.00446724	0.301221	0.262321	0.258481	0.259245	0.0728542	0.0794386	0.0688659	0.137249	0.150296	0.14485	0.234495	0.231057	0.248246	0.0649639	0.126645	0.0574489	0.13565	0.1424	0.109682	0.147344	0.12001	0.139498	0.153891	0.139479	0.163545	0.177756	0.162699	0.15388	0.155754	0.191418	0.125835
k__Bacteria;p__Proteobacteria;c__Gammaproteobacteria;o__Enterobacteriales;f__Enterobacteriaceae;g__Citrobacter	2.13837e-05	6.16333e-05	1.14021e-05	6.92311e-05	4.78389e-06	3.1359e-05	2.8274e-05	1.10948e-05	2.34606e-05	9.89526e-06	9.50623e-05	3.27223e-05	6.27572e-05	3.56218e-05	4.87598e-05	7.061e-05	0.000195126	7.2638e-06	9.784e-05	4.88342e-05	7.03957e-05	0.000469206	2.71304e-05	1.73712e-05	1.23898e-05	2.29898e-05	4.24041e-05	2.34347e-05	9.95973e-05	9.80544e-05	4.59885e-05	0	3.61069e-05	3.85951e-05	3.95538e-05	3.14976e-05	0	6.18898e-05	2.80824e-05	0	3.2188e-05	9.98951e-05	0.000209362	0.000202891	0.000192824	0.000132655	4.35796e-05	7.39809e-05	1.85981e-05
k__Bacteria;p__Proteobacteria;c__Gammaproteobacteria;o__Enterobacteriales;f__Enterobacteriaceae;g__Enterobacter	0	0	0	0	0	0	0	3.69827e-06	9.38425e-06	0	0	0	0	0	0	0	0	0	0	5.42602e-06	0	0	0	0	3.09746e-06	9.19591e-06	0	0	4.74273e-06	5.16076e-06	0	0	0	0	0	1.57488e-05	0	0	0	0	0	0	0	0	0	0	0	0	0
k__Bacteria;p__Proteobacteria;c__Gammaproteobacteria;o__Enterobacteriales;f__Enterobacteriaceae;g__Erwinia	7.12791e-06	1.12061e-05	5.70103e-06	2.13019e-05	9.56778e-06	1.56795e-05	1.4137e-05	6.65688e-05	7.97661e-05	0	3.27801e-05	6.18087e-05	3.13786e-05	2.37479e-05	6.96568e-06	4.2366e-05	3.79412e-05	0	6.90636e-05	3.79822e-05	5.86631e-05	1.15853e-05	1.35652e-05	8.68561e-06	2.47797e-05	2.29898e-05	1.59015e-05	3.51521e-05	4.74273e-05	5.67683e-05	6.64279e-05	3.94358e-05	0.000108321	1.92976e-05	0.000118661	3.14976e-05	0	0.00012378	5.61648e-05	0.000116249	4.8282e-05	0.000149843	6.61142e-05	5.96737e-05	5.93305e-05	6.63277e-05	2.17898e-05	5.91847e-05	3.71962e-05
k__Bacteria;p__Proteobacteria;c__Gammaproteobacteria;o__Enterobacteriales;f__Enterobacteriaceae;g__Escherichia	3.56396e-06	0	0	5.32547e-06	0	0	9.42467e-06	3.69827e-06	4.69213e-06	0	6.55602e-06	1.8179e-05	1.56893e-05	1.78109e-05	0	7.061e-06	1.62605e-05	0	1.15106e-05	1.62781e-05	5.86631e-06	0	0	1.30284e-05	0	9.19591e-06	5.30051e-06	0	4.74273e-06	1.54823e-05	1.02197e-05	1.31453e-05	1.80535e-05	1.92976e-05	0	4.72463e-05	0	0	0	2.90622e-05	1.6094e-05	1.24869e-05	2.20381e-05	0	2.96652e-05	0	0	0	0
k__Bacteria;p__Proteobacteria;c__Gammaproteobacteria;o__Enterobacteriales;f__Enterobacteriaceae;g__Ewingella	0	0	0	0	0	0	4.71234e-06	0	0	0	0	0	0	0	0	0	0	0	0	0	0	0	0	0	0	0	0	0	0	0	0	0	0	0	0	0	0	0	0	0	0	0	0	0	0	0	0	0	0
k__Bacteria;p__Proteobacteria;c__Gammaproteobacteria;o__Enterobacteriales;f__Enterobacteriaceae;g__Klebsiella	0	0	0	0	0	3.91988e-06	0	0	9.38425e-06	0	0	0	0	0	0	0	5.42017e-06	0	0	0	5.86631e-06	5.79267e-06	4.52174e-06	4.3428e-06	0	0	5.30051e-06	0	0	0	0	0	0	0	0	0	0	0	1.40412e-05	4.35932e-05	0	1.24869e-05	0	0	2.96652e-05	2.21092e-05	0	0	0
k__Bacteria;p__Proteobacteria;c__Gammaproteobacteria;o__Enterobacteriales;f__Enterobacteriaceae;g__Pantoea	0	0	0	0	0	0	0	0	0	0	0	0	0	0	0	0	0	0	0	0	5.86631e-06	5.79267e-06	0	0	0	0	0	0	0	0	0	0	0	0	0	0	0	1.54725e-05	0	0	0	0	0	0	0	0	0	0	0
k__Bacteria;p__Proteobacteria;c__Gammaproteobacteria;o__Enterobacteriales;f__Enterobacteriaceae;g__Plesiomonas	0	0	5.70103e-06	5.32547e-06	0	0	0	3.69827e-06	0	0	6.55602e-06	3.63581e-06	1.56893e-05	0	0	0	1.62605e-05	0	1.15106e-05	1.0852e-05	5.86631e-06	0	4.52174e-06	0	0	4.59795e-06	0	0	4.74273e-06	0	5.10984e-06	0	0	0	1.97769e-05	3.14976e-05	4.03763e-05	3.09449e-05	0	2.90622e-05	3.2188e-05	1.24869e-05	5.50952e-05	0	1.48326e-05	0	0	1.47962e-05	0
k__Bacteria;p__Proteobacteria;c__Gammaproteobacteria;o__Enterobacteriales;f__Enterobacteriaceae;g__Proteus	7.12791e-06	5.60303e-06	1.71031e-05	1.59764e-05	0	3.91988e-06	4.71234e-06	7.39653e-06	3.7537e-05	9.89526e-06	9.83403e-06	3.27223e-05	5.22977e-06	0	0	0	0	0	5.7553e-06	2.71301e-05	1.75989e-05	0	4.52174e-06	4.3428e-06	3.09746e-06	0	0	0	0	5.16076e-06	1.02197e-05	0	1.80535e-05	3.85951e-05	1.97769e-05	1.57488e-05	6.05645e-05	7.73623e-05	8.42472e-05	0	3.2188e-05	1.24869e-05	1.1019e-05	0	1.48326e-05	0	4.35796e-05	1.47962e-05	5.57942e-05
k__Bacteria;p__Proteobacteria;c__Gammaproteobacteria;o__Enterobacteriales;f__Enterobacteriaceae;g__Salmonella	0	0	0	0	0	3.91988e-06	0	0	4.69213e-06	0	0	0	0	0	0	0	0	0	0	0	0	0	0	0	0	0	0	0	0	0	0	0	0	0	0	0	0	0	0	0	0	0	0	0	0	0	0	0	0
k__Bacteria;p__Proteobacteria;c__Gammaproteobacteria;o__Enterobacteriales;f__Enterobacteriaceae;g__Serratia	0	0	0	0	0	3.91988e-06	0	0	4.69213e-06	0	0	3.63581e-06	0	0	0	0	0	0	0	0	0	0	0	0	0	9.19591e-06	0	0	0	5.16076e-06	0	0	1.80535e-05	0	1.97769e-05	0	0	0	0	0	0	0	0	0	2.96652e-05	0	0	0	1.85981e-05
k__Bacteria;p__Proteobacteria;c__Gammaproteobacteria;o__Enterobacteriales;f__Enterobacteriaceae;g__Shigella	0	0	0	0	0	0	0	0	0	0	0	0	0	0	0	0	0	0	0	0	0	0	0	0	0	0	0	0	0	0	0	0	0	0	0	0	0	0	0	1.45311e-05	0	0	0	0	0	0	0	0	0
k__Bacteria;p__Proteobacteria;c__Gammaproteobacteria;o__Enterobacteriales;f__Enterobacteriaceae;g__Trabulsiella	0	5.60303e-06	0	0	0	0	0	0	0	0	0	0	0	0	0	0	5.42017e-06	0	0	0	0	0	0	0	0	0	0	0	0	0	5.10984e-06	0	0	0	0	0	0	0	0	0	0	0	0	0	0	0	0	0	0
k__Bacteria;p__Proteobacteria;c__Gammaproteobacteria;o__Legionellales;f__Coxiellaceae;g__	0	0	0	0	0	0	0	0	0	0	0	0	0	0	0	0	0	0	0	0	0	0	0	0	0	0	0	0	0	0	0	0	0	0	0	0	0	0	0	0	0	0	0	0	0	0	0	0	0
k__Bacteria;p__Proteobacteria;c__Gammaproteobacteria;o__Legionellales;f__Coxiellaceae;g__Rickettsiella	0	0	0	0	0	0	0	0.00010725	9.38425e-06	0	0	0	0	0	0	0	0	0	0	0	0	0	0	0	0	0	0	0	4.74273e-06	0	0	0	0	0	0	0	0	0	0	0	0	0	0	0	0	0	0	0	0
k__Bacteria;p__Proteobacteria;c__Gammaproteobacteria;o__Legionellales;f__Francisellaceae;g__	0	0	0	0	0	0	0	0	0	0	0	0	0	0	0	0	0	0	0	0	0	0	0	0	0	0	0	0	0	0	0	0	0	0	0	0	0	0	0	0	0	0	0	0	0	0	0	0	0
k__Bacteria;p__Proteobacteria;c__Gammaproteobacteria;o__Oceanospirillales;f__Halomonadaceae;g__Candidatus Portiera	0	0	0	0	0	0	0	0	0	0	0	0	0	0	0	0	0	0	0	0	0	0	0	0	0	0	0	0	0	0	0	0	0	0	0	0	0	0	0	0	0	0	0	0	0	0	0	0	0
k__Bacteria;p__Proteobacteria;c__Gammaproteobacteria;o__Oceanospirillales;f__Oceanospirillaceae;g__Oceanospirillum	0	0	0	0	0	0	0	0	0	0	0	0	0	0	0	0	0	0	0	0	0	0	0	0	0	0	0	0	0	0	0	0	0	0	0	0	0	0	0	0	0	0	0	0	0	0	0	0	0
k__Bacteria;p__Proteobacteria;c__Gammaproteobacteria;o__Oceanospirillales;f__Oceanospirillaceae;g__Oleispira	0	0	0	0	0	0	0	0	0	0	0	0	0	0	0	0	0	0	0	0	0	0	0	0	0	0	0	0	0	0	0	0	0	0	0	0	0	0	0	0	0	0	0	0	0	0	0	0	0
k__Bacteria;p__Proteobacteria;c__Gammaproteobacteria;o__Pasteurellales;f__Pasteurellaceae;Other	0	0	5.70103e-06	0	0	0	4.71234e-06	0	0	4.94763e-06	0	0	0	0	0	7.061e-06	0	2.90552e-05	0	0	0	0	0	8.68561e-06	0	0	0	0	0	0	0	1.31453e-05	0	0	0	0	0	0	0	0	0	0	0	0	0	0	0	0	0
k__Bacteria;p__Proteobacteria;c__Gammaproteobacteria;o__Pasteurellales;f__Pasteurellaceae;g__	0	0	0	0	0	0	0	0	0	0	0	0	0	0	0	0	5.42017e-06	0	0	0	0	0	0	0	6.19492e-06	0	0	0	0	5.16076e-06	0	0	0	0	0	0	0	0	0	0	0	0	0	0	1.48326e-05	0	0	1.47962e-05	0
k__Bacteria;p__Proteobacteria;c__Gammaproteobacteria;o__Pasteurellales;f__Pasteurellaceae;g__Actinobacillus	0	0	0	0	0	7.83976e-06	9.42467e-06	0	0	0	6.55602e-06	3.63581e-06	0	5.93697e-06	1.39314e-05	7.061e-06	0	0	0	1.0852e-05	0	1.15853e-05	0	4.3428e-06	0	0	1.0601e-05	0	0	0	5.10984e-06	1.31453e-05	0	1.92976e-05	0	0	2.01882e-05	0	2.80824e-05	0	0	0	6.61142e-05	2.38695e-05	0	2.21092e-05	4.35796e-05	4.43885e-05	0
k__Bacteria;p__Proteobacteria;c__Gammaproteobacteria;o__Pasteurellales;f__Pasteurellaceae;g__Aggregatibacter	3.56396e-05	3.36182e-05	5.70103e-05	2.13019e-05	1.91356e-05	1.17596e-05	4.71234e-06	2.21896e-05	1.87685e-05	2.47381e-05	1.96681e-05	3.27223e-05	2.61488e-05	2.96849e-05	2.0897e-05	0	5.42017e-06	3.6319e-05	1.72659e-05	2.17041e-05	0	1.15853e-05	1.35652e-05	2.60568e-05	2.47797e-05	4.59795e-06	3.71036e-05	2.34347e-05	9.48546e-06	2.58038e-05	1.02197e-05	3.94358e-05	0	1.92976e-05	0	1.57488e-05	2.01882e-05	0	0	2.90622e-05	3.2188e-05	0	6.61142e-05	0	4.44978e-05	0	4.35796e-05	1.47962e-05	5.57942e-05
k__Bacteria;p__Proteobacteria;c__Gammaproteobacteria;o__Pasteurellales;f__Pasteurellaceae;g__Haemophilus	0.000167506	0.0001849	0.000262247	0.000244971	0.000153084	0.00031751	9.42467e-05	0.000225594	9.85346e-05	0.000138534	0.000426141	0.000203605	0.000203961	0.000184046	0.000181108	0.00117919	0.000905169	0.000399509	0.00019568	0.000179059	0.000258118	0.00123963	0.000307478	0.00032571	0.000204432	0.00015633	0.000365735	0.000164043	0.000227651	0.000159983	0.000189064	0.000184034	7.22139e-05	0.000250868	0.000177992	0.000157488	0.000100941	0.000185669	0.000252742	0.000159842	0.000177034	0.00016233	0.000220381	0.000202891	0.000504309	0.000486403	6.53694e-05	0.000236739	0.000148785
k__Bacteria;p__Proteobacteria;c__Gammaproteobacteria;o__Pseudomonadales;f__Moraxellaceae;g__Acinetobacter	0	0	0	0	4.78389e-06	7.83976e-06	0	3.69827e-06	0	0	0	7.27162e-06	0	0	6.96568e-06	0	5.42017e-06	0	1.15106e-05	0	0	0	0	0	0	1.37939e-05	0	0	4.74273e-06	0	0	5.25811e-05	0	0	0	0	0	0	5.61648e-05	0	0	0	0	0	0	0	0	0	0
k__Bacteria;p__Proteobacteria;c__Gammaproteobacteria;o__Pseudomonadales;f__Moraxellaceae;g__Enhydrobacter	3.56396e-06	0	0	5.32547e-06	9.56778e-06	0	0	0	0	0	0	0	0	0	0	0	0	0	0	0	0	0	4.52174e-06	1.73712e-05	2.16822e-05	1.37939e-05	1.59015e-05	0	9.48546e-06	0	0	0	0	0	0	0	0	0	0	0	0	0	0	0	0	0	0	0	0
k__Bacteria;p__Proteobacteria;c__Gammaproteobacteria;o__Pseudomonadales;f__Moraxellaceae;g__Moraxella	0	0	5.70103e-06	0	0	0	0	0	0	0	0	0	0	0	0	0	0	0	0	0	0	0	0	0	0	0	0	0	0	0	0	0	0	1.92976e-05	0	0	0	0	0	0	0	0	0	0	0	0	0	0	0
k__Bacteria;p__Proteobacteria;c__Gammaproteobacteria;o__Pseudomonadales;f__Moraxellaceae;g__Psychrobacter	0	0	0	0	0	0	0	0	0	0	0	0	0	0	0	0	0	0	0	0	0	0	0	0	0	0	0	0	0	0	0	0	0	0	0	0	0	0	0	0	0	0	0	0	0	0	0	0	0
k__Bacteria;p__Proteobacteria;c__Gammaproteobacteria;o__Pseudomonadales;f__Pseudomonadaceae;g__	0	0	0	5.32547e-06	0	0	0	3.69827e-06	4.69213e-06	0	3.27801e-06	0	0	5.93697e-06	0	0	5.42017e-06	0	0	0	0	5.79267e-06	0	0	0	0	0	0	4.74273e-06	0	0	0	0	0	0	0	2.01882e-05	0	0	0	0	0	1.1019e-05	0	1.48326e-05	0	0	0	0
k__Bacteria;p__Proteobacteria;c__Gammaproteobacteria;o__Pseudomonadales;f__Pseudomonadaceae;g__Pseudomonas	0	0	1.14021e-05	0	0	0	6.59727e-05	0.000166422	1.87685e-05	0	0	4.36297e-05	0	0	6.96568e-06	1.4122e-05	1.62605e-05	0	0	0	0	0	4.52174e-06	4.3428e-06	1.85848e-05	1.37939e-05	0	0	4.74273e-06	0	1.02197e-05	0	0	0	0	0	0	0	0	0	0	0	0	0	0	0	0	0	0
k__Bacteria;p__Proteobacteria;c__Gammaproteobacteria;o__Thiohalorhabdales;f__Thiohalorhabdaceae;g__	0	0	0	0	0	0	0	0	0	0	0	0	0	0	0	0	0	0	0	0	0	0	0	0	0	0	0	0	0	0	0	0	0	0	0	0	0	0	0	0	0	0	0	0	0	0	0	0	0
k__Bacteria;p__Proteobacteria;c__Gammaproteobacteria;o__Vibrionales;f__Pseudoalteromonadaceae;g__Pseudoalteromonas	0	0	0	0	0	0	0	0	0	0	0	0	0	0	0	0	0	0	0	0	0	0	0	0	0	0	0	0	0	0	0	0	0	0	0	0	0	0	0	0	0	0	0	0	0	0	0	0	0
k__Bacteria;p__Proteobacteria;c__Gammaproteobacteria;o__Vibrionales;f__Vibrionaceae;g__	0	0	0	0	0	0	0	0	0	0	0	0	0	0	0	0	0	0	0	0	0	0	0	0	0	0	0	0	0	0	0	0	0	0	0	0	0	0	0	0	0	0	0	0	0	0	0	0	0
k__Bacteria;p__Proteobacteria;c__Gammaproteobacteria;o__Vibrionales;f__Vibrionaceae;g__Photobacterium	0	0	0	0	0	0	0	0	0	0	0	0	0	0	0	0	0	0	0	0	0	0	0	0	0	0	0	0	0	0	0	0	0	0	0	0	0	0	0	0	0	0	0	0	0	0	0	0	0
k__Bacteria;p__Proteobacteria;c__Gammaproteobacteria;o__Vibrionales;f__Vibrionaceae;g__Vibrio	0	0	0	0	0	0	0	0	0	0	0	0	0	0	0	0	0	0	0	0	0	0	0	0	0	0	0	0	0	0	0	0	0	0	0	0	0	0	0	0	0	0	0	0	0	0	0	0	0
k__Bacteria;p__Proteobacteria;c__Gammaproteobacteria;o__Xanthomonadales;f__Xanthomonadaceae;Other	0	0	0	0	0	0	0	0	0	0	0	0	0	0	0	0	0	0	0	0	0	0	0	0	3.09746e-06	0	0	0	0	0	0	0	0	0	0	0	0	0	0	0	0	0	0	0	0	0	0	0	0
k__Bacteria;p__Proteobacteria;c__Gammaproteobacteria;o__Xanthomonadales;f__Xanthomonadaceae;g__	0	0	0	0	0	0	0	0.000125741	4.69213e-06	0	3.27801e-06	0	0	0	0	0	0	0	0	5.42602e-06	0	0	0	0	0	4.59795e-06	0	5.85868e-06	0	0	0	0	7.22139e-05	0	0	4.72463e-05	0	0	0	7.26554e-05	0	0	0	0	0	0	0	0	0
k__Bacteria;p__Proteobacteria;c__Gammaproteobacteria;o__Xanthomonadales;f__Xanthomonadaceae;g__Arenimonas	0	0	0	0	0	0	0	0	0	0	0	0	0	0	0	0	0	0	0	0	0	0	0	0	0	0	0	0	0	0	0	0	0	0	0	1.57488e-05	0	0	0	0	0	0	0	0	0	0	0	0	0
k__Bacteria;p__Proteobacteria;c__Gammaproteobacteria;o__Xanthomonadales;f__Xanthomonadaceae;g__Luteibacter	0	0	0	0	0	0	0	1.84913e-05	0	0	0	0	0	0	0	0	0	0	0	5.42602e-06	0	0	0	0	0	0	0	0	0	0	0	0	0	0	0	0	0	0	0	0	0	0	0	0	0	0	0	0	0
k__Bacteria;p__Proteobacteria;c__Gammaproteobacteria;o__Xanthomonadales;f__Xanthomonadaceae;g__Pseudoxanthomonas	0	0	0	0	0	0	0	7.39653e-06	0	0	0	0	0	0	0	0	0	0	0	0	0	0	0	0	0	0	0	0	0	0	0	0	0	0	0	0	0	0	0	0	0	0	0	0	0	0	0	0	0
k__Bacteria;p__Proteobacteria;c__Gammaproteobacteria;o__Xanthomonadales;f__Xanthomonadaceae;g__Stenotrophomonas	0	0	0	0	0	3.91988e-06	5.18357e-05	0.000129439	4.69213e-06	0	0	0	0	0	0	0	0	0	0	0	0	0	0	0	0	4.59795e-06	0	5.85868e-06	0	0	5.10984e-06	0	0.000920727	0	3.95538e-05	0.000677197	0	0	0	0.00145311	0	0	1.1019e-05	0	2.96652e-05	0	0	0	1.85981e-05
k__Bacteria;p__SAR406;c__AB16;o__Arctic96B-7;f__A714017;g__ZA3312c	0	0	0	0	0	0	0	0	0	0	0	0	0	0	0	0	0	0	0	0	0	0	0	0	0	0	0	0	0	0	0	0	0	0	0	0	0	0	0	0	0	0	0	0	0	0	0	0	0
k__Bacteria;p__Synergistetes;c__Synergistia;o__Synergistales;f__Dethiosulfovibrionaceae;g__TG5	0	5.60303e-06	0	0	0	0	0	0	0	0	0	0	0	0	0	0	0	0	0	0	0	0	0	0	0	0	0	0	0	0	0	0	0	0	0	0	0	0	0	0	0	0	0	0	0	0	0	0	0
k__Bacteria;p__TM7;c__TM7-1;o__;f__;g__	0	0	1.14021e-05	0	0	0	0	0	0	0	0	0	0	0	0	0	0	0	0	0	5.86631e-06	0	4.52174e-06	8.68561e-06	6.19492e-06	0	1.59015e-05	1.7576e-05	0	0	2.04393e-05	0	0	0	0	0	0	0	0	0	0	0	0	0	0	0	0	0	0
k__Bacteria;p__TM7;c__TM7-3;o__;f__;g__	3.56396e-06	1.68091e-05	5.70103e-06	1.59764e-05	0	1.56795e-05	0	2.21896e-05	0	9.89526e-06	3.27801e-06	1.8179e-05	0	1.18739e-05	1.39314e-05	1.4122e-05	1.08403e-05	4.35828e-05	5.7553e-06	1.62781e-05	5.86631e-06	1.7378e-05	9.04347e-06	1.30284e-05	9.29238e-06	4.59795e-06	5.30051e-06	0	9.48546e-06	5.16076e-06	1.02197e-05	1.31453e-05	1.80535e-05	0	0	1.57488e-05	0	0	0	0	0	0	0	0	1.48326e-05	2.21092e-05	0	0	0
k__Bacteria;p__TM7;c__TM7-3;o__CW040;f__;g__	0	1.68091e-05	1.71031e-05	0	0	3.91988e-06	0	0	0	0	0	0	0	0	0	1.4122e-05	0	0	5.7553e-06	0	0	0	0	8.68561e-06	0	0	0	0	0	0	5.10984e-06	0	0	0	1.97769e-05	0	0	0	0	0	0	0	0	0	0	0	0	0	0
k__Bacteria;p__TM7;c__TM7-3;o__CW040;f__F16;g__	0	0	0	0	0	0	0	0	0	0	0	0	0	0	0	0	0	0	0	0	0	0	0	0	0	0	0	0	0	0	0	0	0	0	0	0	0	0	0	1.45311e-05	0	0	0	0	0	0	0	0	0
k__Bacteria;p__TM7;c__TM7-3;o__I025;f__Rs-045;g__	0	0	0	0	0	0	0	0	0	0	0	0	0	0	0	0	0	7.2638e-06	0	0	0	0	0	0	0	0	0	0	4.74273e-06	0	0	0	0	0	0	0	0	0	0	0	0	0	0	0	0	0	0	0	0
k__Bacteria;p__Tenericutes;c__Mollicutes;o__Anaeroplasmatales;f__Anaeroplasmataceae;g__	7.12791e-06	0	0	0	0	0	0	0	0	0	0	0	0	0	0	0	0	0	0	0	0	0	0	0	0	0	0	0	0	0	0	0	1.80535e-05	0	0	0	0	0	1.40412e-05	0	0	0	0	0	0	0	0	0	0
k__Bacteria;p__Tenericutes;c__Mollicutes;o__RF39;f__;g__	3.20756e-05	5.60303e-05	4.56082e-05	1.59764e-05	3.82711e-05	3.52789e-05	3.76987e-05	3.32844e-05	4.69213e-06	2.96858e-05	4.58922e-05	5.09013e-05	5.22977e-06	5.93697e-06	1.39314e-05	2.1183e-05	2.16807e-05	5.81104e-05	0	1.0852e-05	1.75989e-05	4.63414e-05	4.52174e-06	3.47424e-05	3.09746e-06	0	3.71036e-05	0	0	5.16076e-06	5.10984e-06	0.000131453	5.41604e-05	5.78927e-05	1.97769e-05	0.000110241	0	7.73623e-05	4.21236e-05	2.90622e-05	1.6094e-05	4.99476e-05	7.71333e-05	2.38695e-05	4.44978e-05	8.84369e-05	4.35796e-05	8.87771e-05	1.85981e-05
k__Bacteria;p__Tenericutes;c__RF3;o__ML615J-28;f__;g__	3.56396e-06	0	5.70103e-06	0	9.56778e-06	0	0	3.69827e-06	0	0	0	0	5.22977e-06	5.93697e-06	0	7.061e-06	2.16807e-05	2.17914e-05	0	0	0	0	2.26087e-05	0	0	0	5.30051e-06	1.7576e-05	0	0	0	0	0	0	0	0	0	0	0	0	0	0	0	0	0	0	0	0	0
k__Bacteria;p__Verrucomicrobia;c__Opitutae;o__[Cerasicoccales];f__[Cerasicoccaceae];g__	0	0	0	0	0	0	0	0	0	0	0	0	0	0	0	0	0	0	0	0	0	0	0	0	0	0	0	0	0	0	0	0	0	0	0	0	0	0	0	1.45311e-05	0	0	0	0	0	0	0	0	0
k__Bacteria;p__Verrucomicrobia;c__Verrucomicrobiae;o__Verrucomicrobiales;f__Verrucomicrobiaceae;g__Akkermansia	0.00114047	0.0014792	0.00120292	0.00103314	0.000674528	0.000795735	0.00056548	0.000920868	0.000539595	0.000880678	0.000698216	0.00194879	0.000324246	0.000498706	0.000376147	0.000289501	5.96219e-05	0.00172878	4.02871e-05	0.000320135	0.000357845	0.000237499	0.00052	0.000846847	0.000334526	0.00020231	0.000238523	0.000287075	0.000123311	0.000196109	0.000250382	0.00193235	0.00166092	0.00167889	0.00124595	0.00143314	0.000868091	0.00082004	0.000800348	0.00122061	0.00123924	0.000437041	0.000749295	0.000883171	0.00096412	0.000729604	0.00318131	0.00121329	0.00130187
k__Bacteria;p__[Thermi];c__Deinococci;o__Deinococcales;f__Deinococcaceae;g__Deinococcus	0	0	0	5.32547e-06	0	0	0	0	0	0	0	0	0	0	0	0	0	0	0	0	2.34652e-05	0	1.35652e-05	4.3428e-06	0	0	0	0	4.74273e-06	0	0	0	0	0	0	0	0	0	0	0	0	0	0	0	0	0	0	0	0
[truncated: 66 more columns]

## Sheet: L6_sp
#SampleID	UserID	Chewer	Total_Chewing_time_s	Average_chew_time	MB_group	Day	Substrate_state	Substrate	Control	Time	Description	#OTU ID	Unassigned;Other;Other;Other;Other;Other	k__Archaea;p__Euryarchaeota;c__Methanobacteria;o__Methanobacteriales;f__Methanobacteriaceae;g__Methanobrevibacter	k__Bacteria;Other;Other;Other;Other;Other	k__Bacteria;p__Actinobacteria;Other;Other;Other;Other	k__Bacteria;p__Actinobacteria;c__Actinobacteria;o__Actinomycetales;Other;Other	k__Bacteria;p__Actinobacteria;c__Actinobacteria;o__Actinomycetales;f__Actinomycetaceae;g__	k__Bacteria;p__Actinobacteria;c__Actinobacteria;o__Actinomycetales;f__Actinomycetaceae;g__Actinomyces	k__Bacteria;p__Actinobacteria;c__Actinobacteria;o__Actinomycetales;f__Actinomycetaceae;g__Mobiluncus	k__Bacteria;p__Actinobacteria;c__Actinobacteria;o__Actinomycetales;f__Actinomycetaceae;g__Varibaculum	k__Bacteria;p__Actinobacteria;c__Actinobacteria;o__Actinomycetales;f__Brevibacteriaceae;g__Brevibacterium	k__Bacteria;p__Actinobacteria;c__Actinobacteria;o__Actinomycetales;f__Cellulomonadaceae;g__Cellulomonas	k__Bacteria;p__Actinobacteria;c__Actinobacteria;o__Actinomycetales;f__Corynebacteriaceae;g__Corynebacterium	k__Bacteria;p__Actinobacteria;c__Actinobacteria;o__Actinomycetales;f__Dermacoccaceae;g__Dermacoccus	k__Bacteria;p__Actinobacteria;c__Actinobacteria;o__Actinomycetales;f__Frankiaceae;g__	k__Bacteria;p__Actinobacteria;c__Actinobacteria;o__Actinomycetales;f__Geodermatophilaceae;g__	k__Bacteria;p__Actinobacteria;c__Actinobacteria;o__Actinomycetales;f__Intrasporangiaceae;Other	k__Bacteria;p__Actinobacteria;c__Actinobacteria;o__Actinomycetales;f__Kineosporiaceae;g__Kineococcus	k__Bacteria;p__Actinobacteria;c__Actinobacteria;o__Actinomycetales;f__Microbacteriaceae;Other	k__Bacteria;p__Actinobacteria;c__Actinobacteria;o__Actinomycetales;f__Microbacteriaceae;g__	k__Bacteria;p__Actinobacteria;c__Actinobacteria;o__Actinomycetales;f__Micrococcaceae;g__Arthrobacter	k__Bacteria;p__Actinobacteria;c__Actinobacteria;o__Actinomycetales;f__Micrococcaceae;g__Kocuria	k__Bacteria;p__Actinobacteria;c__Actinobacteria;o__Actinomycetales;f__Micrococcaceae;g__Micrococcus	k__Bacteria;p__Actinobacteria;c__Actinobacteria;o__Actinomycetales;f__Micrococcaceae;g__Rothia	k__Bacteria;p__Actinobacteria;c__Actinobacteria;o__Actinomycetales;f__Nocardiaceae;g__Rhodococcus	k__Bacteria;p__Actinobacteria;c__Actinobacteria;o__Actinomycetales;f__Nocardioidaceae;g__	k__Bacteria;p__Actinobacteria;c__Actinobacteria;o__Actinomycetales;f__Nocardioidaceae;g__Aeromicrobium	k__Bacteria;p__Actinobacteria;c__Actinobacteria;o__Actinomycetales;f__Nocardioidaceae;g__Nocardioides	k__Bacteria;p__Actinobacteria;c__Actinobacteria;o__Actinomycetales;f__Propionibacteriaceae;g__Propionibacterium	k__Bacteria;p__Actinobacteria;c__Actinobacteria;o__Actinomycetales;f__Pseudonocardiaceae;g__Actinomycetospora	k__Bacteria;p__Actinobacteria;c__Actinobacteria;o__Actinomycetales;f__Sporichthyaceae;g__	k__Bacteria;p__Actinobacteria;c__Actinobacteria;o__Actinomycetales;f__Streptomycetaceae;g__Streptomyces	k__Bacteria;p__Actinobacteria;c__Actinobacteria;o__Actinomycetales;f__Williamsiaceae;g__Williamsia	k__Bacteria;p__Actinobacteria;c__Actinobacteria;o__Bifidobacteriales;f__Bifidobacteriaceae;Other	k__Bacteria;p__Actinobacteria;c__Actinobacteria;o__Bifidobacteriales;f__Bifidobacteriaceae;g__	k__Bacteria;p__Actinobacteria;c__Actinobacteria;o__Bifidobacteriales;f__Bifidobacteriaceae;g__Bifidobacterium	k__Bacteria;p__Actinobacteria;c__Actinobacteria;o__Bifidobacteriales;f__Bifidobacteriaceae;g__Scardovia	k__Bacteria;p__Actinobacteria;c__Coriobacteriia;o__Coriobacteriales;f__Coriobacteriaceae;Other
S1	27	D03	20.6	Med	Chewer	1	chewed	rice	NA	16	chewed_rice_16h_D03	S1	0.0146158	4.98954e-05	0	0	0	0	6.41512e-05	0	0	0	0	2.49477e-05	0	0	0	0	0	0	0	0	0	0	2.13837e-05	0	0	0	0	0	0	0	0	0	0	0	0.264228	0	6.05873e-05
S2	29	D03	20.6	Med	Chewer	1	chewed	rice	NA	16	chewed_rice_16h_D03	S2	0.0147135	7.28393e-05	1.12061e-05	0	0	0	0.000112061	0	1.12061e-05	0	0	0	0	0	0	0	0	0	0	5.60303e-06	0	0	1.12061e-05	0	0	0	0	0	0	0	0	0	0	5.60303e-06	0.253302	0	7.84424e-05
S3	30	D03	20.6	Med	Chewer	1	chewed	rice	NA	16	chewed_rice_16h_D03	S3	0.0133974	7.41133e-05	0	0	5.70103e-06	0	6.84123e-05	0	0	0	0	0	0	0	0	0	0	0	0	0	0	0	0	0	5.70103e-06	0	0	0	0	0	0	0	0	0	0.248086	0	0.000102618
S4	38	D04	34.2	Long	Smoosher	1	chewed	rice	NA	16	chewed_rice_16h_D04	S4	0.0171853	5.32547e-06	0	0	0	1.06509e-05	6.92311e-05	0	5.32547e-06	0	0	1.06509e-05	0	0	0	0	0	0	0	0	0	0	0	0	0	0	0	0	0	0	0	0	0	1.06509e-05	0.0800631	0	1.59764e-05
S5	41	D04	34.2	Long	Smoosher	1	chewed	rice	NA	16	chewed_rice_16h_D04	S5	0.0147487	0	0	0	0	0	4.3055e-05	0	0	0	0	0	0	0	0	0	0	0	0	0	0	0	9.56778e-06	0	0	0	0	0	0	0	0	0	0	0	0.0995527	0	3.34872e-05
S6	42	D04	34.2	Long	Smoosher	1	chewed	rice	NA	16	chewed_rice_16h_D04	S6	0.0150563	1.17596e-05	0	0	0	0	0.000105837	0	3.91988e-06	0	0	0	0	0	0	0	0	0	0	0	0	0	1.17596e-05	0	0	0	0	0	0	0	0	0	0	3.91988e-06	0.0736506	0	2.35193e-05
S7	D1U1	NA	NA	NA	Unchewed	1	unchewed	rice	NA	16	unchewed_rice_16h	S7	0.0139768	1.4137e-05	0	0	0	0	4.71234e-05	0	0	0	0	0	0	0	0	0	0	0	0	0	0	0	0	0	0	0	0	0	0	0	0	0	0	4.71234e-06	0.231248	0	5.18357e-05
S8	D1U2	NA	NA	NA	Unchewed	1	unchewed	rice	NA	16	unchewed_rice_16h	S8	0.0138537	2.58879e-05	0	0	7.39653e-06	0	3.69827e-05	0	0	0	1.10948e-05	3.69827e-06	0	3.69827e-06	3.69827e-06	0	1.10948e-05	3.69827e-06	6.28705e-05	0	0	0	1.84913e-05	1.10948e-05	1.10948e-05	3.69827e-06	3.69827e-06	0	1.10948e-05	3.69827e-06	6.65688e-05	2.95861e-05	0	0	0.253997	0	4.43792e-05
S9	D1U3	NA	NA	NA	Unchewed	1	unchewed	rice	NA	16	unchewed_rice_16h	S9	0.0145972	2.81528e-05	0	0	0	0	4.22291e-05	0	0	0	9.38425e-06	4.69213e-06	0	0	0	0	0	0	0	0	0	0	9.38425e-06	0	0	0	0	0	0	0	2.81528e-05	0	0	9.38425e-06	0.213384	0	2.34606e-05
S10	D1H1	NA	NA	NA	Homogenised	1	homogenised	rice	NA	16	homogenised_rice_16h	S10	0.0132695	0	0	0	0	0	7.42144e-05	0	9.89526e-06	0	0	9.89526e-06	0	0	0	0	0	0	0	0	0	0	4.94763e-06	0	0	0	0	0	0	0	0	0	0	4.94763e-06	0.108403	0	9.89526e-06
S11	D1H2	NA	NA	NA	Homogenised	1	homogenised	rice	NA	16	homogenised_rice_16h	S11	0.0160655	9.83403e-06	0	0	0	0	0.000104896	0	0	0	0	3.27801e-06	0	0	0	0	0	0	0	0	0	0	1.3112e-05	0	0	0	0	0	0	0	0	0	0	0	0.0474951	0	3.60581e-05
S12	D1H3	NA	NA	NA	Homogenised	1	homogenised	rice	NA	16	homogenised_rice_16h	S12	0.0210804	3.63581e-06	7.27162e-06	0	0	0	7.6352e-05	0	0	0	0	3.63581e-06	0	0	0	0	0	0	0	0	0	0	0	0	0	0	0	0	0	0	0	0	0	0	0.161746	0	1.09074e-05
S13	204	D19	18.7	Short	Cruncher	4	chewed	rice	NA	16	chewed_rice_16h_D19	S13	0.0131215	5.22977e-06	0	0	0	5.22977e-06	0.000130744	0	0	0	0	0	0	0	0	0	0	0	0	0	0	0	0	0	0	0	0	0	0	0	0	0	0	5.22977e-06	0.125384	0	4.18382e-05
S14	206	D19	18.7	Short	Cruncher	4	chewed	rice	NA	16	chewed_rice_16h_D19	S14	0.0105797	0	0	0	0	0	8.90546e-05	5.93697e-06	0	0	0	0	0	0	0	0	0	0	0	0	0	0	5.93697e-06	0	0	0	0	0	0	0	0	0	0	0	0.247364	0	6.53067e-05
S15	207	D19	18.7	Short	Cruncher	4	chewed	rice	NA	16	chewed_rice_16h_D19	S15	0.00875586	6.96568e-06	0	0	0	6.96568e-06	0.000139314	0	0	0	0	0	0	0	0	0	0	0	0	0	0	0	0	0	0	0	0	0	0	0	0	0	0	0	0.245143	0	6.96568e-05
S16	Control A	NA	NA	NA	NA	NA	NA	water	vehicle 16 h	16	water_16h	S16	0.00869915	2.8244e-05	0	0	0	1.4122e-05	0.000444843	0	0	0	0	7.061e-06	0	0	0	0	0	0	0	0	7.061e-06	0	7.061e-06	0	0	0	0	0	0	0	0	0	0	0	0.0392874	0	6.3549e-05
S17	Control B	NA	NA	NA	NA	NA	NA	water	vehicle 16 h	16	water_16h	S17	0.00768038	1.62605e-05	0	0	0	0	0.000238488	0	5.42017e-06	0	0	5.42017e-06	0	0	0	0	0	0	0	0	0	0	5.42017e-06	0	0	0	0	0	0	0	0	0	0	0	0.0312364	0	0.000130084
S18	Blank 0 h	NA	NA	NA	NA	NA	NA	water	inoculum 0 h	0	Blank_0h	S18	0.00509919	7.2638e-05	0	0	0	1.45276e-05	0.000813546	0	7.2638e-06	1.45276e-05	0	2.17914e-05	0	0	0	0	0	0	0	0	0	0	0.000123485	0	0	0	0	0	0	0	0	0	0	7.2638e-06	0.0686792	0	0.000225178
S19	Pos A	NA	NA	NA	NA	NA	NA	inulin GR	inulin GR 16 h	16	inulin_GR_16h	S19	0.00879985	0	0	0	0	1.15106e-05	0.000120861	0	0	0	0	0	0	0	0	0	0	0	0	0	0	0	0	0	0	0	0	0	0	0	0	0	0	2.87765e-05	0.282102	0	6.90636e-05
S20	Pos B	NA	NA	NA	NA	NA	NA	inulin GR	inulin GR 16 h	16	inulin_GR_16h	S20	0.00919711	5.42602e-06	0	0	0	5.42602e-06	0.000189911	5.42602e-06	1.0852e-05	0	0	0	0	0	0	0	0	0	0	0	0	0	1.0852e-05	0	0	0	0	0	0	0	0	0	0	5.42602e-06	0.256391	0	5.42602e-05
S21	Pos C	NA	NA	NA	NA	NA	NA	inulin GR	inulin GR 16 h	16	inulin_GR_16h	S21	0.0116857	0	5.86631e-06	0	0	0	0.000152524	0	5.86631e-06	0	0	5.86631e-06	0	0	0	0	0	0	0	0	0	0	1.75989e-05	0	5.86631e-06	0	0	0	0	0	0	0	0	5.86631e-06	0.206559	0	3.51978e-05
S22	Blank 16 h	NA	NA	NA	NA	NA	NA	water	inoculum 16 h	16	Blank_16h	S22	0.00746096	1.7378e-05	0	0	0	0	0.00026067	0	0	0	0	1.7378e-05	0	0	0	0	0	0	0	0	0	0	1.7378e-05	0	0	0	0	0	0	0	0	0	0	0	0.0326127	0	0.000104268
S23	5	D01	12.7	Short	Chewer	1	chewed	rice	NA	16	chewed_rice_16h_D01	S23	0.00910225	1.80869e-05	0	0	0	1.35652e-05	8.5913e-05	0	0	0	0	1.35652e-05	0	0	0	0	0	0	0	4.52174e-06	0	0	1.35652e-05	0	0	0	0	0	0	0	0	0	0	9.04347e-06	0.286149	0	7.68695e-05
S24	7	D01	12.7	Short	Chewer	1	chewed	rice	NA	16	chewed_rice_16h_D01	S24	0.0123379	1.73712e-05	0	0	0	4.3428e-06	0.000204112	0	4.3428e-06	0	0	0	0	0	0	0	0	0	0	4.3428e-06	0	0	8.68561e-06	0	0	0	0	0	0	0	0	0	4.3428e-06	4.3428e-06	0.252534	4.3428e-06	9.11989e-05
S25	8	D01	12.7	Short	Chewer	1	chewed	rice	NA	16	chewed_rice_16h_D01	S25	0.00934504	2.16822e-05	0	0	0	0	7.12416e-05	0	0	0	0	3.09746e-06	0	0	0	0	0	0	0	0	0	0	1.23898e-05	0	0	0	0	0	0	0	3.09746e-06	0	0	0	0.314566	0	4.95594e-05
S26	50	D05	29.7	Long	Cruncher	1	chewed	rice	NA	16	chewed_rice_16h_D05	S26	0.00886945	0	0	0	0	4.59795e-06	0.000124145	0	0	0	0	4.59795e-06	0	0	0	0	0	0	0	0	0	0	9.19591e-06	0	9.19591e-06	0	0	0	0	0	0	0	0	0	0.120043	0	2.29898e-05
S27	52	D05	29.7	Long	Cruncher	1	chewed	rice	NA	16	chewed_rice_16h_D05	S27	0.00702848	1.59015e-05	0	0	0	5.30051e-06	0.000132513	5.30051e-06	1.0601e-05	0	0	0	0	0	0	0	0	0	0	0	0	0	5.30051e-06	0	0	0	0	0	0	0	0	0	0	1.59015e-05	0.105252	0	8.48082e-05
S28	53	D05	29.7	Long	Cruncher	1	chewed	rice	NA	16	chewed_rice_16h_D05	S28	0.00923327	5.85868e-06	0	0	0	5.85868e-06	7.03041e-05	0	0	0	0	5.85868e-06	0	0	0	0	0	0	0	0	0	0	1.17174e-05	0	0	0	0	0	0	0	0	0	0	0	0.109223	0	7.61628e-05
S29	303	D28	30.7	Long	Smoosher	5	chewed	rice	NA	16	chewed_rice_16h_D28	S29	0.00701924	0	0	0	0	0	6.16555e-05	0	0	0	0	9.48546e-06	0	0	0	0	0	0	0	0	0	0	9.48546e-06	0	0	0	0	0	0	0	0	0	4.74273e-06	4.74273e-06	0.140138	0	1.89709e-05
S30	305	D28	30.7	Long	Smoosher	5	chewed	rice	NA	16	chewed_rice_16h_D28	S30	0.0080353	0	0	0	0	0	0.000118697	0	5.16076e-06	0	0	0	0	0	0	0	0	0	0	0	0	5.16076e-06	2.58038e-05	0	0	0	0	0	0	1.03215e-05	5.16076e-06	5.16076e-06	0	1.03215e-05	0.187836	0	7.22506e-05
S31	306	D28	30.7	Long	Smoosher	5	chewed	rice	NA	16	chewed_rice_16h_D28	S31	0.00746547	0	0	0	0	1.02197e-05	0.000168625	0	0	0	0	5.10984e-06	0	0	0	0	0	0	5.10984e-06	0	0	0	0	0	0	0	0	0	0	0	5.10984e-06	0	0	5.10984e-06	0.25682	0	4.08787e-05
S32	17	D02	21	Med	Cruncher	1	chewed	rice	NA	16	chewed_rice_16h_D02	S32	0.0312069	5.25811e-05	0	0	0	1.31453e-05	0.000170888	0	1.31453e-05	0	0	0	0	0	0	0	0	0	0	2.62905e-05	0	0	0	0	0	0	0	0	0	0	0	0	0	2.62905e-05	0.268742	0	3.94358e-05
S33	19	D02	21	Med	Cruncher	1	chewed	rice	NA	16	chewed_rice_16h_D02	S33	0.033074	7.22139e-05	0	0	0	0	9.02674e-05	0	0	0	0	0	0	0	0	0	0	0	0	0	0	0	1.80535e-05	0	0	0	0	0	0	0	0	0	0	0	0.214295	0	0
S34	20	D02	21	Med	Cruncher	1	chewed	rice	NA	16	chewed_rice_16h_D02	S34	0.0329602	9.64878e-05	0	0	0	1.92976e-05	3.85951e-05	0	0	0	0	0	0	0	0	0	0	0	0	1.92976e-05	0	0	1.92976e-05	0	0	0	0	0	0	0	0	0	0	0	0.268873	0	1.92976e-05
S35	61	D06	10.3	Short	Smoosher	1	chewed	rice	NA	16	chewed_rice_16h_D06	S35	0.0389605	0	0	0	0	0	5.93307e-05	0	0	0	0	0	0	0	0	0	0	0	0	0	0	0	3.95538e-05	0	0	0	0	0	0	0	0	0	0	5.93307e-05	0.100902	0	0
S36	62	D06	10.3	Short	Smoosher	1	chewed	rice	NA	16	chewed_rice_16h_D06	S36	0.0265209	0	0	0	0	0	0.000141739	0	0	0	0	0	0	0	0	0	0	0	0	0	0	0	0	0	0	0	0	0	0	0	0	0	0	1.57488e-05	0.187395	0	3.14976e-05
S37	63	D06	10.3	Short	Smoosher	1	chewed	rice	NA	16	chewed_rice_16h_D06	S37	0.0384988	0	0	0	0	0	4.03763e-05	0	0	0	0	0	0	0	0	0	0	0	0	0	0	0	0	0	0	0	0	0	0	0	0	0	0	0	0.114346	0	0
S38	71	D07	16	Short	Chewer	2	chewed	rice	NA	16	chewed_rice_16h_D07	S38	0.0307592	1.54725e-05	0	1.54725e-05	0	0	9.28347e-05	0	0	0	0	0	0	0	0	0	0	0	0	0	0	0	0	0	0	0	0	0	0	0	0	0	0	4.64174e-05	0.192029	0	1.54725e-05
S39	73	D07	16	Short	Chewer	2	chewed	rice	NA	16	chewed_rice_16h_D07	S39	0.0315646	0	0	0	0	0	9.82884e-05	0	1.40412e-05	0	0	0	0	0	0	0	0	0	0	0	0	0	0	0	0	0	0	0	0	0	0	0	0	1.40412e-05	0.217863	0	2.80824e-05
S40	75	D07	16	Short	Chewer	2	chewed	rice	NA	16	chewed_rice_16h_D07	S40	0.0284955	5.81243e-05	0	0	0	1.45311e-05	0.000159842	0	0	0	0	1.45311e-05	0	0	0	0	0	0	0	0	0	0	1.45311e-05	0	0	0	0	0	0	0	0	0	1.45311e-05	0	0.204685	0	0
S41	83	D08	21	Med	Chewer	2	chewed	rice	NA	16	chewed_rice_16h_D08	S41	0.0282289	1.6094e-05	0	0	0	0	0.000144846	0	0	0	0	0	0	0	0	0	0	0	0	0	0	0	0	0	0	0	0	0	0	0	0	0	0	0	0.170355	0	3.2188e-05
S42	84	D08	21	Med	Chewer	2	chewed	rice	NA	16	chewed_rice_16h_D08	S42	0.0269592	1.24869e-05	0	0	0	0	0.00016233	0	0	0	0	2.49738e-05	0	0	0	0	0	0	0	0	0	0	0	0	0	0	0	0	0	0	0	0	0	1.24869e-05	0.0808651	0	0
S43	86	D08	21	Med	Chewer	2	chewed	rice	NA	16	chewed_rice_16h_D08	S43	0.0351838	0	0	0	0	0	0.000132228	0	0	0	0	0	0	0	0	0	0	0	0	0	0	0	0	0	0	0	0	0	0	0	0	0	0	0	0.0682409	0	1.1019e-05
S44	93	D09	22.8	Med	Smoosher	2	chewed	rice	NA	16	chewed_rice_16h_D09	S44	0.0356252	3.58042e-05	0	0	0	0	0.000202891	0	1.19347e-05	0	0	4.7739e-05	0	0	0	0	0	0	0	0	0	0	0	0	0	0	0	0	0	0	0	0	0	0	0.070773	0	0
S45	96	D09	22.8	Med	Smoosher	2	chewed	rice	NA	16	chewed_rice_16h_D09	S45	0.033581	0	0	0	0	0	0.000148326	0	0	0	0	1.48326e-05	0	0	0	0	0	0	0	0	0	0	1.48326e-05	0	0	0	0	0	0	0	0	0	0	0	0.0489773	0	2.96652e-05
S46	97	D09	22.8	Med	Smoosher	2	chewed	rice	NA	16	chewed_rice_16h_D09	S46	0.0312403	0	0	0	0	0	8.84369e-05	0	4.42184e-05	0	0	0	0	0	0	0	0	0	0	0	0	0	0	0	0	0	0	0	0	0	0	0	0	0	0.0602034	0	0
S47	105	D10	20.9	Med	Cruncher	2	chewed	rice	NA	16	chewed_rice_16h_D10	S47	0.0354738	0	0	0	0	2.17898e-05	0.000152529	0	0	0	0	0	0	0	0	0	0	0	0	0	0	0	0	0	0	0	0	0	0	0	0	0	0	0	0.163119	0	0
S48	106	D10	20.9	Med	Cruncher	2	chewed	rice	NA	16	chewed_rice_16h_D10	S48	0.0290597	4.43885e-05	0	0	0	0	0.000177554	0	0	0	0	2.95924e-05	0	0	0	0	0	0	0	0	0	0	0	0	0	0	0	0	0	0	0	0	1.47962e-05	0	0.178886	0	0
S49	107	D10	20.9	Med	Cruncher	2	chewed	rice	NA	16	chewed_rice_16h_D10	S49	0.0361547	1.85981e-05	0	0	0	3.71962e-05	3.71962e-05	0	0	1.85981e-05	0	0	0	0	0	0	0	0	0	0	0	0	0	0	0	0	0	0	0	0	0	0	0	0	0.18414	0	3.71962e-05
S50	115	D11	32.7	Long	Smoosher	2	chewed	rice	NA	16	chewed_rice_16h_D11	S50	0.0326422	0	2.18929e-05	0	0	0	0.000240821	0	0	0	0	0	0	0	0	0	0	0	0	0	0	0	0	0	0	0	0	0	0	0	0	0	0	0	0.121374	0	2.18929e-05
S51	117	D11	32.7	Long	Smoosher	2	chewed	rice	NA	16	chewed_rice_16h_D11	S51	0.0274793	1.42527e-05	0	0	0	0	0.000114022	0	0	0	0	1.42527e-05	0	0	0	0	0	0	0	0	0	0	0	0	0	0	0	0	0	0	0	0	0	0	0.0972464	0	2.85055e-05
S52	119	D11	32.7	Long	Smoosher	2	chewed	rice	NA	16	chewed_rice_16h_D11	S52	0.0258852	0	0	0	0	0	0.00029278	0	0	0	0	1.72224e-05	0	0	0	0	0	0	0	0	0	0	0	0	0	0	0	0	0	0	0	0	0	0	0.0552322	0	3.44448e-05
S53	127	D12	28.4	Long	Cruncher	2	chewed	rice	NA	16	chewed_rice_16h_D12	S53	0.0286537	0	0	0	0	0	0.000228772	0	0	0	0	0	0	0	0	0	0	0	0	0	0	0	0	0	0	0	0	0	0	0	0	0	0	0	0.122336	0	3.81286e-05
S54	128	D12	28.4	Long	Cruncher	2	chewed	rice	NA	16	chewed_rice_16h_D12	S54	0.0254843	2.43055e-05	0	0	0	0	0.000218749	0	0	0	0	0	0	0	0	0	0	0	0	0	0	0	2.43055e-05	0	0	0	0	0	0	0	0	0	0	0	0.194881	0	3.64582e-05
S55	130	D12	28.4	Long	Cruncher	2	chewed	rice	NA	16	chewed_rice_16h_D12	S55	0.0384486	0	0	0	0	0	0.000152393	0	0	0	0	0	0	0	0	0	0	0	0	0	0	0	0	0	0	0	0	0	0	0	0	0	0	0	0.138479	0	3.04785e-05
S56	D2U1	Unchewed	Unchewed	Unchewed	Unchewed	2	Unchewed	rice	NA	16	unchewed_rice_16h_	S56	0.0397333	2.22284e-05	0	0	0	0	5.5571e-05	0	0	0	0	0	2.22284e-05	0	0	0	0	0	0	0	0	0	0	0	0	0	0	0	0	0	0	0	0	3.33426e-05	0.213537	0	1.11142e-05
S57	D2U2	Unchewed	Unchewed	Unchewed	Unchewed	2	Unchewed	rice	NA	16	unchewed_rice_16h_	S57	0.0360838	8.21207e-05	0	0	0	0	1.64241e-05	0	0	0	0	0	0	0	0	0	0	0	0	0	0	0	0	0	0	0	0	0	0	0	0	0	0	0	0.23631	0	3.28483e-05
S58	D2U3	Unchewed	Unchewed	Unchewed	Unchewed	2	Unchewed	rice	NA	16	unchewed_rice_16h_	S58	0.0235159	4.64742e-05	0	0	0	0	0.000139422	0	0	0	0	0	0	0	0	0	0	0	0	0	0	0	1.54914e-05	0	0	0	0	0	0	0	0	0	0	3.09828e-05	0.276661	0	4.64742e-05
S59	D2H1	Homogenised	Homogenised	Homogenised	Homogenised	2	Homogenised	rice	NA	16	homogenised_rice_16h_	S59	0.0339061	2.8734e-05	0	0	0	0	8.62019e-05	0	0	0	0	1.4367e-05	0	0	0	0	0	0	0	0	0	0	0	0	0	0	0	0	0	0	0	0	0	0	0.0396529	0	2.8734e-05
S60	D2H2	Homogenised	Homogenised	Homogenised	Homogenised	2	Homogenised	rice	NA	16	homogenised_rice_16h_	S60	0.0254415	0	0	0	0	0	0.000128622	0	0	0	0	0	0	0	0	0	0	0	0	1.28622e-05	0	0	1.28622e-05	0	0	0	0	0	0	0	0	0	0	0	0.082717	0	0
S61	D2H3	Homogenised	Homogenised	Homogenised	Homogenised	2	Homogenised	rice	NA	16	homogenised_rice_16h_	S61	0.0266331	1.37001e-05	0	0	0	0	0.000109601	0	0	0	0	0	0	0	0	0	0	0	0	0	0	0	0	0	0	0	0	0	0	0	0	0	1.37001e-05	0	0.0415525	0	0
S62	138	D13	23.7	Med	Smoosher	3	chewed	rice	NA	16	chewed_rice_16h_D13	S62	0.0312282	0	0	0	0	0	9.04416e-05	1.29202e-05	0	0	0	1.29202e-05	0	0	0	0	0	0	0	0	0	0	0	0	0	0	0	0	0	0	0	0	0	0	0.202809	0	2.58405e-05
S63	139	D13	23.7	Med	Smoosher	3	chewed	rice	NA	16	chewed_rice_16h_D13	S63	0.030062	0	0	0	0	0	0.000118354	0	0	0	0	1.18354e-05	0	0	0	0	0	0	0	0	0	0	0	0	0	0	0	0	0	0	0	0	0	1.18354e-05	0.14309	0	1.18354e-05
S64	140	D13	23.7	Med	Smoosher	3	chewed	rice	NA	16	chewed_rice_16h_D13	S64	0.0279981	0	1.2855e-05	0	0	0	7.71297e-05	0	0	0	0	1.2855e-05	0	0	0	0	0	0	0	0	0	0	0	0	0	0	0	0	0	0	0	0	0	1.2855e-05	0.126274	0	2.57099e-05
S65	148	D14	20.4	Med	Smoosher	3	chewed	rice	NA	16	chewed_rice_16h_D14	S65	0.02273	0	0	0	0	0	0.000180875	1.5073e-05	0	0	0	1.5073e-05	0	0	0	0	0	0	0	0	0	0	6.02918e-05	0	0	0	0	0	0	0	0	0	0	0	0.0888852	0	1.5073e-05
S66	151	D14	20.4	Med	Smoosher	3	chewed	rice	NA	16	chewed_rice_16h_D14	S66	0.0234868	1.09854e-05	0	0	0	1.09854e-05	0.000164781	0	1.09854e-05	0	0	0	0	0	0	0	0	0	0	0	0	0	3.29562e-05	0	0	0	0	0	0	0	0	0	0	0	0.0905086	0	3.29562e-05
S67	152	D14	20.4	Med	Smoosher	3	chewed	rice	NA	16	chewed_rice_16h_D14	S67	0.0309241	1.46699e-05	0	0	0	0	0.000161368	0	0	0	0	0	0	0	0	0	0	0	0	0	0	0	0	0	0	0	0	0	0	0	0	0	0	0	0.07065	0	1.46699e-05
S68	160	D15	28.2	Long	Chewer	3	chewed	rice	NA	16	chewed_rice_16h_D15	S68	0.0382613	0	0	0	0	0	6.22743e-05	0	0	0	0	0	0	0	0	0	0	0	0	0	0	0	0	0	0	0	0	0	0	0	0	0	0	0	0.0745423	0	2.49097e-05
S69	162	D15	28.2	Long	Chewer	3	chewed	rice	NA	16	chewed_rice_16h_D15	S69	0.0256538	1.42126e-05	0	0	0	0	0.000213189	0	1.42126e-05	1.42126e-05	0	0	0	0	0	0	0	0	0	0	0	0	0	0	0	0	0	0	0	0	0	0	0	1.42126e-05	0.110844	0	0
S70	163	D15	28.2	Long	Chewer	3	chewed	rice	NA	16	chewed_rice_16h_D15	S70	0.0251865	0	0	0	0	1.5414e-05	6.16561e-05	0	0	0	0	0	0	0	0	0	0	0	0	0	0	0	1.5414e-05	0	0	0	0	0	0	0	0	0	0	0	0.118041	0	1.5414e-05
S71	170	D16	10.2	Short	Chewer	3	chewed	rice	NA	16	chewed_rice_16h_D16	S71	0.0267456	1.61215e-05	0	0	0	0	0.000290187	0	0	0	0	0	0	0	0	0	0	0	0	1.61215e-05	0	1.61215e-05	0	0	0	0	0	0	0	0	0	0	3.2243e-05	0	0.22741	0	3.2243e-05
S72	172	D16	10.2	Short	Chewer	3	chewed	rice	NA	16	chewed_rice_16h_D16	S72	0.026062	0	0	1.51612e-05	0	0	0.000106128	0	4.54835e-05	0	0	0	0	0	0	0	0	0	0	0	0	0	0	0	0	0	0	0	0	0	0	0	0	0	0.200461	0	1.51612e-05
S73	173	D16	10.2	Short	Chewer	3	chewed	rice	NA	16	chewed_rice_16h_D16	S73	0.0155541	0	0	0	0	0	6.41849e-05	0	0	0	0	0	0	0	0	0	0	0	0	0	0	0	0	0	0	0	0	0	0	0	0	0	0	0	0.252204	0	4.27899e-05
S74	182	D17	11.1	Short	Cruncher	3	chewed	rice	NA	16	chewed_rice_16h_D17	S74	0.0272795	1.35181e-05	0	0	0	0	2.70362e-05	0	0	0	0	1.35181e-05	0	0	0	0	0	0	0	0	0	0	0	0	0	0	0	0	0	0	0	0	0	0	0.246178	0	6.75904e-05
S75	183	D17	11.1	Short	Cruncher	3	chewed	rice	NA	16	chewed_rice_16h_D17	S75	0.020201	0	0	0	0	0	0.00022302	0	0	0	0	0	0	0	0	0	0	0	0	0	0	0	1.17379e-05	0	0	0	0	0	0	0	0	0	0	0	0.228349	0	5.86896e-05
S76	185	D17	11.1	Short	Cruncher	3	chewed	rice	NA	16	chewed_rice_16h_D17	S76	0.0323622	2.81901e-05	0	0	0	0	0.000155045	0	0	0	0	1.4095e-05	0	0	0	0	0	0	0	0	0	0	0	0	0	0	0	0	0	0	0	0	1.4095e-05	1.4095e-05	0.196908	0	5.63801e-05
S77	192	D18	36.1	Long	Smoosher	3	chewed	rice	NA	16	chewed_rice_16h_D18	S77	0.0244738	0	0	0	0	0	0.000317017	0	0	0	0	1.58509e-05	0	0	0	0	0	0	0	0	0	0	0	0	0	0	0	0	0	0	0	0	1.58509e-05	0	0.0658287	0	0
S78	194	D18	36.1	Long	Smoosher	3	chewed	rice	NA	16	chewed_rice_16h_D18	S78	0.0254879	0	0	0	0	0	0.000271937	1.23608e-05	3.70824e-05	0	0	2.47216e-05	0	0	0	0	0	0	0	0	0	0	2.47216e-05	0	0	0	0	0	0	0	0	0	1.23608e-05	0	0.072496	0	1.23608e-05
S79	195	D18	36.1	Long	Smoosher	3	chewed	rice	NA	16	chewed_rice_16h_D18	S79	0.0354941	1.53721e-05	0	0	0	0	7.68604e-05	0	0	0	0	3.07442e-05	0	0	0	0	0	0	0	0	0	0	1.53721e-05	0	0	0	0	0	0	0	0	0	0	1.53721e-05	0.0896961	0	4.61162e-05
S80	D3U1	Unchewed	Unchewed	Unchewed	Unchewed	3	Unchewed	rice	NA	16	unchewed_rice_16h_	S80	0.0263734	0	0	0	0	0	6.52577e-05	0	0	0	0	0	0	0	0	9.32253e-06	0	0	0	0	0	0	0	0	0	0	0	9.32253e-06	0	0	0	0	0	9.32253e-06	0.251494	0	2.79676e-05
S81	D3U2	Unchewed	Unchewed	Unchewed	Unchewed	3	Unchewed	rice	NA	16	unchewed_rice_16h_	S81	0.0261166	4.65261e-05	0	0	0	0	0.000124069	0	0	0	0	7.75434e-05	0	0	0	0	0	0	0	0	0	0	0	0	0	0	0	0	0	0	0	0	0	1.55087e-05	0.253846	0	1.55087e-05
S82	D3U3	Unchewed	Unchewed	Unchewed	Unchewed	3	Unchewed	rice	NA	16	unchewed_rice_16h_	S82	0.02061	1.27458e-05	0	0	0	0	5.09833e-05	0	0	0	0	0	0	0	0	0	0	0	0	0	0	0	0	0	0	0	0	1.27458e-05	0	0	0	0	0	0	0.284117	0	6.37292e-05
S83	D3H1	Homogenised	Homogenised	Homogenised	Homogenised	3	Homogenised	rice	NA	16	homogenised_rice_16h_	S83	0.0364013	0	0	0	0	0	0.000112499	0	0	0	0	0	0	0	0	0	0	0	0	0	0	0	0	0	0	0	0	0	0	0	0	0	1.60712e-05	0	0.132588	0	3.21425e-05
S84	D3H2	Homogenised	Homogenised	Homogenised	Homogenised	3	Homogenised	rice	NA	16	homogenised_rice_16h_	S84	0.0290214	2.77982e-05	0	0	0	0	0.000194588	0	1.38991e-05	0	0	1.38991e-05	0	0	0	0	0	0	0	0	0	0	0	0	0	0	0	0	0	0	0	0	0	0	0.0602249	0	2.77982e-05
S85	D3H3	Homogenised	Homogenised	Homogenised	Homogenised	3	Homogenised	rice	NA	16	homogenised_rice_16h_	S85	0.0291317	0	0	0	0	0	7.86918e-05	0	0	0	0	1.57384e-05	0	0	0	0	0	0	0	0	0	0	0	0	0	0	0	0	0	0	0	0	0	0	0.0685091	0	0
S86	215	D20	40.8	Long	Smoosher	4	chewed	rice	NA	16	chewed_rice_16h_D20	S86	0.029787	0	0	0	0	0	0.000169164	0	0	0	0	0	0	0	0	0	0	0	0	0	0	0	0	0	0	0	0	0	0	0	0	0	0	0	0.141308	0	7.04851e-05
S87	216	D20	40.8	Long	Smoosher	4	chewed	rice	NA	16	chewed_rice_16h_D20	S87	0.0243519	1.15686e-05	0	0	0	0	0.000115686	0	0	0	0	0	0	0	0	0	0	0	0	0	0	0	0	0	0	0	0	0	0	0	0	0	1.15686e-05	1.15686e-05	0.219109	0	2.31372e-05
S88	218	D20	40.8	Long	Smoosher	4	chewed	rice	NA	16	chewed_rice_16h_D20	S88	0.033946	0	1.42931e-05	0	0	0	0.000114345	0	1.42931e-05	0	0	1.42931e-05	0	0	0	0	0	0	0	0	0	0	0	0	0	0	0	0	0	0	0	0	0	0	0.144746	0	2.85861e-05
S89	225	D21	16.7	Short	Cruncher	4	chewed	rice	NA	16	chewed_rice_16h_D21	S89	0.0259838	0	0	0	0	0	0.00014391	0	0	0	0	0	0	0	0	0	0	0	0	0	0	0	4.79701e-05	0	0	0	0	0	0	0	0	0	0	0	0.183038	0	1.599e-05
S90	228	D21	16.7	Short	Cruncher	4	chewed	rice	NA	16	chewed_rice_16h_D21	S90	0.0240257	0	0	0	0	0	0.000145108	0	0	0	0	0	0	0	0	0	0	0	0	0	0	0	1.03648e-05	0	0	0	0	0	0	0	0	0	0	1.03648e-05	0.18637	0	2.07297e-05
S91	229	D21	16.7	Short	Cruncher	4	chewed	rice	NA	16	chewed_rice_16h_D21	S91	0.0357186	0	0	0	0	0	0.000157939	0	0	0	0	1.21492e-05	0	0	0	0	0	0	0	0	0	0	2.42984e-05	0	0	0	0	0	0	0	0	0	0	0	0.185482	0	1.21492e-05
S92	236	D22	19.2	Short	Chewer	4	chewed	rice	NA	16	chewed_rice_16h_D22	S92	0.0307726	0	0	0	0	0	0.000134559	0	0	0	0	1.03507e-05	0	0	0	0	0	0	0	0	0	0	1.03507e-05	0	0	0	0	0	0	0	0	0	0	0	0.214176	0	0
S93	238	D22	19.2	Short	Chewer	4	chewed	rice	NA	16	chewed_rice_16h_D22	S93	0.0310468	5.98666e-05	0	0	0	0	0.000119733	0	0	0	0	0	0	0	0	0	0	0	0	0	0	0	0	0	0	0	0	0	0	0	0	0	0	1.19733e-05	0.220046	0	3.592e-05
S94	239	D22	19.2	Short	Chewer	4	chewed	rice	NA	16	chewed_rice_16h_D22	S94	0.0313707	3.31614e-05	0	0	0	0	0.000149227	0	0	0	0	0	0	0	0	0	0	0	0	0	0	0	0	0	0	0	0	0	0	0	0	0	0	0	0.22578	0	0
S95	248	D23	14.7	Short	Chewer	4	chewed	rice	NA	16	chewed_rice_16h_D23	S95	0.0328579	0	1.23805e-05	0	0	1.23805e-05	0.000123805	0	0	0	0	0	0	0	0	0	0	0	0	0	0	0	0	0	0	0	0	0	0	0	0	0	0	1.23805e-05	0.186723	0	0
S96	249	D23	14.7	Short	Chewer	4	chewed	rice	NA	16	chewed_rice_16h_D23	S96	0.0300196	0	0	0	0	0	0.000114676	0	1.27418e-05	0	0	1.27418e-05	0	0	0	0	0	0	0	0	0	0	0	0	0	0	0	0	0	0	0	0	1.27418e-05	0	0.183341	0	2.54836e-05
S97	251	D23	14.7	Short	Chewer	4	chewed	rice	NA	16	chewed_rice_16h_D23	S97	0.0277831	5.93023e-05	0	0	0	0	5.93023e-05	0	0	0	0	0	0	0	0	0	0	0	0	0	0	0	0	0	0	0	0	0	0	0	0	0	1.48256e-05	2.96512e-05	0.203036	0	0
S98	258	D24	26.1	Med	Smoosher	4	chewed	rice	NA	16	chewed_rice_16h_D24	S98	0.0309916	1.34454e-05	0	0	0	0	0.000201681	0	0	0	0	1.34454e-05	0	0	0	0	0	0	0	0	0	0	1.34454e-05	0	0	0	0	0	0	0	0	0	0	0	0.0594151	0	0
S99	260	D24	26.1	Med	Smoosher	4	chewed	rice	NA	16	chewed_rice_16h_D24	S99	0.0257892	0	0	0	0	0	0.00011513	0	0	0	0	1.04664e-05	0	0	0	0	0	0	0	0	0	0	1.04664e-05	0	0	0	0	0	0	0	0	0	0	0	0.0840136	0	0
S100	262	D24	26.1	Med	Smoosher	4	chewed	rice	NA	16	chewed_rice_16h_D24	S100	0.0264452	0	0	0	0	0	0.000195119	0	0	0	0	0	0	0	0	0	0	0	0	0	0	0	0	0	0	0	0	0	0	0	0	0	0	0	0.0868932	0	3.90239e-05
S101	270	D25	14.9	Short	Cruncher	5	chewed	rice	NA	16	chewed_rice_16h_D25	S101	0.0180004	1.40958e-05	0	0	0	0	0.000112767	0	0	0	0	0	0	0	0	0	0	0	0	0	0	0	0	0	0	0	0	0	0	0	0	0	0	1.40958e-05	0.243717	0	4.22875e-05
S102	271	D25	14.9	Short	Cruncher	5	chewed	rice	NA	16	chewed_rice_16h_D25	S102	0.0216063	0	0	0	0	0	0.000116413	0	0	0	0	1.16413e-05	0	0	0	0	0	0	0	0	0	0	0	0	0	0	0	0	0	0	0	0	0	0	0.193304	0	1.16413e-05
S103	272	D25	14.9	Short	Cruncher	5	chewed	rice	NA	16	chewed_rice_16h_D25	S103	0.0251654	0	0	0	0	1.22103e-05	4.88412e-05	0	0	0	0	0	0	0	0	0	0	0	0	0	0	0	0	0	0	0	0	0	0	0	0	0	0	1.22103e-05	0.202007	0	3.66309e-05
S104	280	D26	25.6	Med	Chewer	5	chewed	rice	NA	16	chewed_rice_16h_D26	S104	0.0334947	3.41e-05	0	0	0	0	0.0001364	0	0	0	0	0	0	0	0	0	0	0	0	0	0	0	0	0	0	0	0	0	0	0	0	0	8.525e-06	0	0.199195	0	1.705e-05
S105	283	D26	25.6	Med	Chewer	5	chewed	rice	NA	16	chewed_rice_16h_D26	S105	0.0368702	3.29591e-05	0	0	0	0	6.59181e-05	0	0	0	0	1.09864e-05	0	0	0	0	0	0	0	0	0	0	0	0	0	0	0	0	0	0	0	0	0	2.19727e-05	0.197293	0	2.19727e-05
S106	284	D26	25.6	Med	Chewer	5	chewed	rice	NA	16	chewed_rice_16h_D26	S106	0.0272494	2.23631e-05	0	0	0	0	6.70893e-05	3.35447e-05	1.11816e-05	0	0	0	0	0	0	0	0	0	0	0	0	0	0	0	0	0	0	0	0	0	0	0	2.23631e-05	1.11816e-05	0.205864	0	6.70893e-05
S107	292	D27	41.3	Long	Chewer	5	chewed	rice	NA	16	chewed_rice_16h_D27	S107	0.0318651	1.04923e-05	0	0	0	0	0.000115415	0	0	0	0	1.04923e-05	0	0	0	0	0	0	0	0	0	0	0	0	0	0	0	1.04923e-05	0	0	0	0	1.04923e-05	0	0.0964767	0	4.19692e-05
S108	293	D27	41.3	Long	Chewer	5	chewed	rice	NA	16	chewed_rice_16h_D27	S108	0.0325187	0	0	0	0	2.181e-05	0.000163575	0	1.0905e-05	0	0	0	0	0	0	0	0	0	0	0	0	0	1.0905e-05	0	0	0	0	1.0905e-05	0	0	0	0	0	0	0.107611	0	1.0905e-05
S109	294	D27	41.3	Long	Chewer	5	chewed	rice	NA	16	chewed_rice_16h_D27	S109	0.0302635	1.13431e-05	0	0	0	0	0.000102088	0	1.13431e-05	0	0	0	0	0	0	0	0	0	0	0	0	0	0	0	0	0	0	0	0	0	0	0	0	0	0.146485	0	3.40294e-05
S110	313	D29	29	Long	Cruncher	5	chewed	rice	NA	16	chewed_rice_16h_D29	S110	0.0307782	0	0	0	0	0	0.00011632	0	2.32639e-05	0	0	0	0	0	0	0	0	0	0	0	0	0	0	0	0	0	0	0	0	0	0	0	0	0	0.137583	0	1.1632e-05
S111	315	D29	29	Long	Cruncher	5	chewed	rice	NA	16	chewed_rice_16h_D29	S111	0.0284908	9.79403e-06	0	0	0	0	0.000176293	0	0	0	0	0	0	0	0	0	0	0	0	0	0	0	0	0	0	0	0	0	0	0	0	0	0	0	0.122807	0	0
S112	317	D29	29	Long	Cruncher	5	chewed	rice	NA	16	chewed_rice_16h_D29	S112	0.0393173	0	0	0	0	0	0.000103433	0	1.29291e-05	0	0	0	0	0	0	0	0	0	0	0	0	0	1.29291e-05	0	0	0	0	0	0	0	0	0	0	0	0.148865	0	1.29291e-05
S116	Pos A rpt	NA			NA	NA	NA	NA	inulin GR	16	inulin_GR	S116	0.0220901	9.93929e-05	8.28274e-06	0	0	0	0.000372723	0	0	0	0	0	0	0	0	0	0	0	0	0	0	0	2.48482e-05	0	0	0	0	0	0	0	0	0	0	8.28274e-06	0.0368168	0	4.14137e-05
S117	Pos B rpt	NA			NA	NA	NA	NA	inulin GR	16	inulin_GR	S117	0.0266514	1.83486e-05	0	0	0	9.17431e-06	6.42202e-05	0	0	0	9.17431e-06	0	0	0	0	0	0	0	0	0	0	0	0	0	0	0	0	0	0	0	0	0	0	1.83486e-05	0.206138	0	2.75229e-05
S118	Blank 0 h	NA			NA	NA	NA	NA	water	0	Blank_0h	S118	0.0184733	0	1.41884e-05	0	0	0	0.000595914	0	1.41884e-05	0	0	0	0	0	0	0	0	0	0	0	0	0	1.41884e-05	0	0	0	0	0	0	0	0	0	0	0	0.0170829	0	0
[truncated: 306 more columns]

[truncated: 7 more sheets: L6_sp (2), L6_SP_1, L6_SP_1 (2), L6_SP_1(3), Sheet2, Sheet3, re]
