# Supplementary material for: Chewing differences in consumers affect the digestion and colonic fermentation outcomes: in vitro studies
Source: Royal Society of Chemistry journal article supplement (doi:10.1039/d1fo04364a), 2022-01-01
Supplement: d1fo04364a2.pdf [file d1fo04364a2.pdf]

**Table S1.** Pearson correlations between oral physiological, anatomical characteristics and chewing behavior and bolus properties. Only the correlations that are significant at  $p < 0.05$  are presented here.

|                                                         | Eye width<br>(mm) | Face length<br>(mm) | Bottom<br>width (mm) | Jaw angle<br>(°) | Bottom face<br>length (mm) | Left eye to<br>mouth<br>(mm) | Max Bite<br>Force (N) | Oral cavity<br>volume<br>(mL) | Unstimulate<br>d saliva<br>flow rate<br>(g/min) | Stimulated<br>saliva flow<br>rate (g/min) | sAA (U/mL) |
|---------------------------------------------------------|-------------------|---------------------|----------------------|------------------|----------------------------|------------------------------|-----------------------|-------------------------------|-------------------------------------------------|-------------------------------------------|------------|
| Natural mouthful size (a mouthful of rice) (g/mouthful) |                   | 0.46 *              |                      |                  | 0.42 *                     |                              |                       |                               |                                                 |                                           | 0.46 *     |
| <b><i>Chewing parameters</i></b>                        |                   |                     |                      |                  |                            |                              |                       |                               |                                                 |                                           |            |
| Total chewing time (s/mouthful)                         |                   |                     |                      |                  |                            |                              |                       |                               |                                                 | − 0.44 *                                  |            |
| Chew time per gram rice (s/g)                           | − 0.42 *          |                     |                      |                  | − 0.37 *                   |                              |                       |                               |                                                 |                                           |            |
| Number of chews                                         |                   |                     |                      |                  |                            |                              |                       |                               |                                                 | − 0.45 *                                  |            |
| Cycle opening angle (°)                                 |                   |                     |                      |                  |                            |                              |                       |                               |                                                 |                                           | 0.40 *     |
| Cycle closing time (s)                                  |                   |                     |                      | 0.49 **          |                            |                              |                       |                               | 0.44 *                                          |                                           |            |
| Cycle opening time (s)                                  |                   |                     |                      |                  |                            | 0.38 *                       |                       |                               |                                                 |                                           |            |
| Distance of closing mouth (mm)                          |                   |                     |                      |                  | 0.39 *                     |                              | 0.43 *                | 0.37 *                        | 0.48 **                                         |                                           |            |
| Vertical closing speed (mm/s)                           |                   |                     |                      |                  |                            |                              | 0.44 *                | 0.40 *                        |                                                 |                                           |            |
| Distance of opening mouth (mm)                          |                   |                     |                      |                  | 0.38 *                     |                              | 0.41 *                |                               | 0.48 **                                         |                                           |            |
| Chew cycle angle (°)                                    |                   |                     |                      |                  | 0.52 **                    |                              |                       |                               |                                                 |                                           |            |
| Area of chew cycle (mm <sup>2</sup> )                   |                   |                     |                      | 0.38 *           | 0.37 *                     |                              | 0.47 *                | 0.44 *                        | 0.57 ***                                        |                                           |            |
| Width of chew cycle (mm)                                |                   |                     |                      |                  |                            |                              |                       |                               | 0.46 *                                          |                                           |            |
| Height of chew cycle (mm)                               |                   |                     |                      |                  |                            |                              | 0.41 *                | 0.37 *                        | 0.47 **                                         |                                           |            |
| Perimeter of chew cycle (mm)                            |                   |                     |                      |                  | 0.38 *                     |                              | 0.42 *                | 0.40 *                        | 0.50 **                                         |                                           |            |
| <b><i>Bolus properties</i></b>                          |                   |                     |                      |                  |                            |                              |                       |                               |                                                 |                                           |            |
| Saliva added to the bolus (g/g dry rice)                |                   |                     |                      |                  |                            |                              |                       |                               |                                                 | 0.59 ***                                  |            |
| Proportion of particles bigger than 2mm (%)             |                   |                     | − 0.37 *             |                  | 0.38 *                     |                              |                       |                               |                                                 |                                           |            |
| Proportion of particles smaller than 2 mm (%)           |                   |                     | 0.37 *               |                  | − 0.38 *                   |                              |                       |                               |                                                 |                                           |            |
| d (0.1) (μm)                                            |                   |                     |                      | − 0.45 *         |                            |                              |                       | − 0.38 *                      |                                                 | 0.38 *                                    |            |
| d (0.5) (μm)                                            |                   |                     |                      |                  |                            |                              |                       |                               |                                                 | 0.40 *                                    |            |
| d (0.9) (μm)                                            |                   |                     | 0.51 **              | − 0.47 **        |                            |                              |                       |                               |                                                 |                                           |            |
| D [3, 2] - Surface weighted mean (μm)                   |                   |                     |                      | − 0.38 *         |                            |                              |                       |                               |                                                 | 0.41 *                                    |            |
| D [4, 3] - Volume weighted mean (μm)                    |                   |                     | 0.45 *               | − 0.42 *         |                            |                              |                       |                               |                                                 |                                           |            |

\*  $p < 0.05$ , \*\*  $p < 0.01$ , \*\*\*  $p < 0.001$

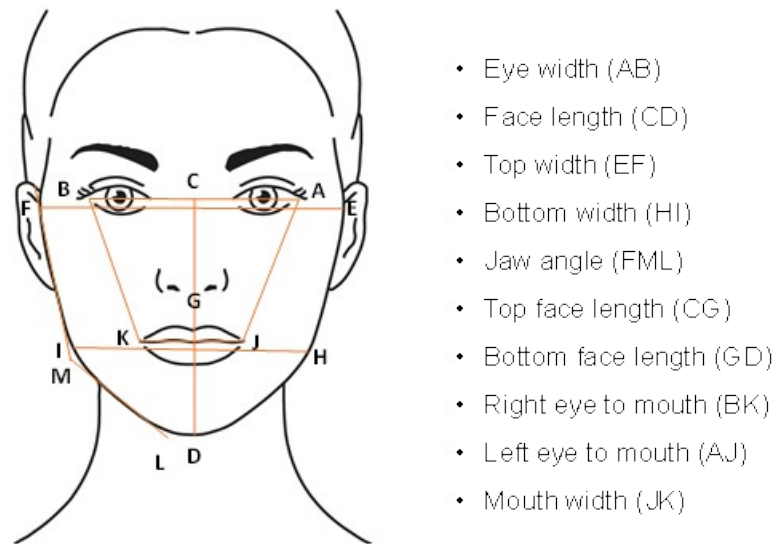

**Figure S1.** The definitions of 10 facial dimension parameters measured.

|               |                                                                                   |                                                                                    |                                                                                     |
|---------------|-----------------------------------------------------------------------------------|------------------------------------------------------------------------------------|-------------------------------------------------------------------------------------|
| Short chewers |  |  |  |
| Long chewers  |  |  |  |

**Figure S2.** Visual inspection of expectorated ready-to-swallow boluses collected from three short chewers and three long chewers.
